# Supplementary material for: Quinolizidine-Type Alkaloids: Chemodiversity, Occurrence, and Bioactivity
Source: PubMed Central journal article supplement — ACS Omega. 2023 Jul 28;8(31):27862–93. doi: 10.1021/acsomega.3c02179 (PMC10413377; doi:10.1021/acsomega.3c02179), 2023-07-28
Supplement: ao3c02179_si_001.pdf [file ao3c02179_si_001.pdf]

## Supporting Information

# Quinolizidine-Type Alkaloids: Chemodiversity, Occurrence and Bioactivity

Willy Cely-Veloza,<sup>†</sup> Massuo J. Kato,<sup>‡</sup> Ericsson Coy-Barrera <sup>\*,†</sup>

<sup>†</sup> Bioorganic Chemistry Laboratory, Facultad de Ciencias Básicas y Aplicadas, Universidad Militar Nueva Granada, Campus Nueva Granada, Cajicá 250247, Colombia.

<sup>‡</sup>Institute of Chemistry, University of São Paulo, São Paulo 05508-000, SP, Brazil

Corresponding author: E. Coy-Barrera. Telephone: +57-1-6500000, ext. 3270. E-mail: ericsson.coy@unimilitar.edu.co

## Contents

|                          |                                                                               | <b>Pages</b> |
|--------------------------|-------------------------------------------------------------------------------|--------------|
| <b>Table S1</b>          | Names and SMILES of compiled 397 quinolizidine alkaloids (QAs)                | 2-21         |
| <b>Figures S1 to S22</b> | Individual structures of quinolizidine alkaloids <b>1-397</b>                 | 22-36        |
| <b>Table S2</b>          | Compendium of reported biological activity of the 397 quinolizidine alkaloids | 37-58        |
| <b>Table S3</b>          | Calculated properties of compiled QAs <b>1-397</b>                            | 59-65        |
| <b>References</b>        |                                                                               | 66-72        |

**Table S1.** Names and SMILES of compiled 397 quinolizidine alkaloids (QAs)

| QAs | Name                                     | SMILES                                                                                     |
|-----|------------------------------------------|--------------------------------------------------------------------------------------------|
| 1   | (-)-sophcence A                          | <chem>[H][C@]12CCCC(N1[C@@H]([C@]3(CCC[N+]4(CCC[C@]2([C@]34[H]))[H])[O-])[H])O)=O</chem>   |
| 2   | (+)-oxymatrine                           | <chem>[H][C@]12CCCC(N1C[C@@]3(CCC[N+]4(CCC[C@]2([C@]34[H]))[H])[O-])[H])=O</chem>          |
| 3   | (+)-oxysophocarpine                      | <chem>[H][C@]1([C@@](CCC2)3[H])CCCN([C@]14[H])CCC[C@@]4(O)C([H])N3C2=O</chem>              |
| 4   | (+)-sophoranol                           | <chem>[H][C@]1([C@@](CCC2)3[H])CCCN([C@]14[H])CCC[C@@]4([H])[C@@H](O)N3C2=O</chem>         |
| 5   | 17 $\beta$ -hydroxysophoridine           | <chem>[H][C@]1([C@@](CCC2)3[H])CCCN([C@]14[H])CCC[C@]4([H])CN3C2=O</chem>                  |
| 6   | sophoridine                              | <chem>[H][C@]1([C@@](CCC2)3[H])CCCN([C@]14[H])CCC[C@]4([H])CN3C2=O</chem>                  |
| 7   | (+)-matrine                              | <chem>[H][C@]1([C@@](CC=C2)3[H])CCCN([C@]14[H])CCC[C@]4([H])CN3C2=O</chem>                 |
| 8   | (+)-9 $\alpha$ -hydroxymatrine           | <chem>O=C1N2C[C@@]([H])([C@@]34[H])CCCN4C[C@@H](O)C[C@]3([H])[C@@]2([H])CCC1</chem>        |
| 9   | (-)-sophocarpine                         | <chem>[H][C@]12CC=CC(N1C[C@]3([H])CCCN4CCC[C@]2([C@]34[H]))[H])=O</chem>                   |
| 10  | (-)- $\Delta^7$ -dehydrosophoramine      | <chem>O=C1C=CC=C2C([C@]34[H])=CCCN4CCC[C@@]3([H])CN12</chem>                               |
| 11  | 15-deoxymatrine                          | <chem>[H][C@]12CCCCN1C[C@@]3(CCCN4CCC[C@@]2([H]))[C@]34[H])[H]</chem>                      |
| 12  | darvasamine                              | <chem>[H][C@@]([C@](CCC1)2[H])([C@]34[H])CCCN4CCC[C@]3([H])CN2C1=O</chem>                  |
| 13  | allomatrine                              | <chem>[H][C@@]([C@@](CCC1)2[H])([C@@]34[H])CCCN4CCC[C@@]3([H])CN2C1=O</chem>               |
| 14  | sophoramine                              | <chem>O=C1C=CC=C2[C@@]([C@]34[H])([H])CCCN4CCC[C@@]3([H])CN12</chem>                       |
| 15  | lehmannine                               | <chem>[H][C@]12CCCN3CCC[C@]([C@]4(C=CCC(N4C1)=O)[H])([C@]23[H])[H]</chem>                  |
| 16  | leontalbinine                            | <chem>[H][C@]12CCCN3CCCC([C@]23[H])=C4CCCC(N4C1)=O</chem>                                  |
| 17  | (+)-5 $\alpha$ -hydroxyoxymatrine        | <chem>O=C1CCC[C@]2([H])[C@@]([C@]34[H])([H])CCC[N+]4([O-])CCC[C@@]3(O)CN12</chem>          |
| 18  | 14 $\beta$ -hydroxyoxymatrine            | <chem>[H][C@@]([C@@](CC[C@@H]1O)2[H])([C@]34[H])CCC[N+]4([O-])CCC[C@@]3([H])CN2C1=O</chem> |
| 19  | 5 $\alpha$ ,14 $\beta$ -dihydroxymatrine | <chem>[H][C@]12CC[C@@H](C(N1C[C@@]3(CCCN4CCC[C@]2([C@]34[H]))[H])O)=O)O</chem>             |

|    |                                   |                                                                                             |
|----|-----------------------------------|---------------------------------------------------------------------------------------------|
| 20 | 7b-sophoramine                    | [H][C@]12CCCN3CCC[C@@](C4=CC=CC(N4C1)=O)([C@]23[H])[H]                                      |
| 21 | 14 β -hydroxymatrine              | [H][C@]12CCCN3CCC[C@]([C@]4(CC[C@@H](C(N4C1)=O)O)[H])([C@]23[H])[H]                         |
| 22 | sophaline F                       | [H][C@@]12CCCN3C(C(CC(C4=CNC5=C4C=CC=C5)=O)=C[C@@]([C@]6(CCCC(N6C1)=O)[H])([C@]23[H])[H])=O |
| 23 | 13b-butoxymatrine                 | [H][C@@]([C@@](C[C@H](OCCCC)C1)2[H])([C@]34[H])CCCN4CCC[C@@]3([H])CN2C1=O                   |
| 24 | (+)-(14β)-14-ethylmatridin-15-one | CC[C@H]1CC[C@]2(N(C1=O)C[C@]3([H])CCCN4CCC[C@]2([C@]34[H])[H])[H]                           |
| 25 | 9,10-dehydrosophocarpine          | [H][C@]12CCCN3C=CC[C@]([C@]4(CC=CC(N4C1)=O)[H])([C@]23[H])[H]                               |
| 26 | 2,3-dehydrosophocarpine           | [H][C@]12CC=CN3CCC[C@]([C@]4(CC=CC(N4C1)=O)[H])([C@]23[H])[H]                               |
| 27 | isomatrine                        | [H][C@@]12CCCN3CCC[C@@]([C@]4(CCCC(N4C1)=O)[H])([C@@]23[H])[H]                              |
| 28 | 7,11-dehydromatrine               | O=C1CCCC2=C([C@]34[H])CCCN4CCC[C@]3([H])CN12                                                |
| 29 | 9α-hydroxy-7,11-dehydromatrine    | O[C@@H](CC([C@]12[H])=C3CCC4)CN2CCC[C@@]1([H])CN3C4=O                                       |
| 30 | 9α-hydroxy-13,14-dehydromatrine   | [H][C@]12CCCN3C[C@H](C[C@]([C@]4(CC=CC(N4C1)=O)[H])([C@]23[H])[H])O                         |
| 31 | 9α-hydroxysophoramine             | O=C1C=CC=C2N1C[C@@]3(CCCN4C[C@H](C[C@]2([C@]34[H])[H])O)[H]                                 |
| 32 | sophtonseedline B                 | O[C@]12CCCN3C[C@H](C[C@]([C@]4(CC=CC(N4C1)=O)[H])([C@]23[H])[H])O                           |
| 33 | sophtonseedline C                 | O[C@]12CCCN3C[C@H](C[C@]([C@]4(CC=CC(N4C1)=O)[H])([C@]23[H])[H])OC(C)=O                     |
| 34 | sophtonseedline D                 | O[C@]12CCCN3C[C@H](C[C@]([C@]4(CC=CC(N4C1)=O)[H])([C@]23[H])[H])OCSC                        |
| 35 | sophtonseedline E                 | O[C@]12CCCN3C[C@H](C[C@]([C@]4(CCCC(N4C1)=O)[H])([C@]23[H])[H])OC(C)=O                      |
| 36 | sophtonseedline F                 | O[C@]12CCCN3C[C@H](C[C@]([C@]4(CCCC(N4C1)=O)[H])([C@]23[H])[H])OCSC                         |
| 37 | sophtonseedline G                 | [H][C@]12CCC[N+](O-)]C[C@H](C[C@]([C@]4(CCCC(N4C1)=O)[H])([C@]23[H])[H])O                   |
| 38 | sophtonseedline H                 | O[C@]12CCCN3C[C@H](C[C@]([C@]4(CCCC(N4C1)=O)[H])([C@]23[H])[H])OC                           |
| 39 | sophtonseedline I                 | O[C@@]12CCCN3C[C@H](CC([C@]4(CCCC(N4C2)=O)[H])=C13)OC(C)=O                                  |
| 40 | sophtonseedline J                 | O[C@]12CCCN3CCC[C@@]4([C@]23O4)[C@]5(CC=CC(N5C1)=O)[H]                                      |

|    |                                              |                                                                            |
|----|----------------------------------------------|----------------------------------------------------------------------------|
| 41 | sophtonseedline K                            | [H][C@@]1(CC=C2)[C@@]([C@]34O5)(O)CCCN4CCC[C@@]35CN1C2=O                   |
| 42 | (-)-5 $\alpha$ -hydroxysophocarpine          | O[C@@]12CCCN3CCC[C@@]([C@]4(CC=CC(N4C1)=O)[H])([C@]23[H])[H]               |
| 43 | (+)-5 $\alpha$ ,9 $\alpha$ -dihydroxymatrine | O[C@@]12CCCN3C[C@@H](O)C[C@@]([C@]4(CCCC(N4C1)=O)[H])([C@]23[H])[H]        |
| 44 | 6,7-dehydromatrine                           | [H][C@@]12CCCN3CCCC([C@]4(CCCC(N4C2)=O)[H])=C13                            |
| 45 | 5-hydroxy-6,7-dehydromatrine                 | O[C@@]12CCCN3CCCC([C@]4(CCCC(N4C2)=O)[H])=C13                              |
| 46 | 5,6-dehydro-matrine                          | [H][C@@]1(CCCC(N1C2)=O)[C@@]3([H])CCCN4CCCC2=C34                           |
| 47 | (+)-12 $\alpha$ -Hydroxysophocarpine         | [H][C@@]([C@@]([C@@H](O)C=C1)2[H])([C@]34[H])CCCN4CCC[C@@]3([H])CN2C1=O    |
| 48 | (-)-13,14-dehydrosophoridine                 | [H][C@@]([C@@]([C@]12O)3[H])([C@]34[H])CCCN4CCC[C@@]3([H])CN2C1=O          |
| 49 | 7 $\alpha$ -hydroxysophoramine               | [H][C@@]([C@]12O)3[H])([C@]34[H])CCCN4CCC[C@@]3([H])CN1C2=O                |
| 50 | 12 $\beta$ -hydroxysophocarpine              | [H][C@@]([C@@]([C@H](O)C=C1)2[H])([C@]34[H])CCCN4CCC[C@@]3([H])CN2C1=O     |
| 51 | (-)-14 $\alpha$ -Acetoxymatrine              | [H][C@@]12CCCN3CCC[C@@]([C@]4(CC[C@H](C(N4C1)=O)OC(C)=O)[H])([C@]23[H])[H] |
| 52 | (-)-14 $\beta$ -Acetoxymatrine               | [H][C@@]([C@@]([C@]12O)3[H])([C@]34[H])CCCN4CCC[C@@]3([H])CN2C1=O          |
| 53 | 14 $\alpha$ -hydroxymatrine                  | [H][C@@]12CCCN3CCC[C@@]([C@]4(CC[C@H](C(N4C1)=O)O)[H])([C@]23[H])[H]       |
| 54 | (-)-14 $\beta$ -Hydroxysophoridine           | [H][C@@]1([C@@]([C@]12O)3[H])([C@]34[H])CCCN4CCC[C@@]3([H])CN3C2=O         |
| 55 | 5,6-dehydro-lupanine                         | [H][C@@]12CCCCN1C[C@H]3C[C@@H]2CN4C(CCC=C34)=O                             |
| 56 | (-)-lupanine                                 | [H][C@@]12CCCCN1C[C@H]3C[C@@H]2CN4C(CCC[C@]34[H])=O                        |
| 57 | 5 $\alpha$ -hydroxylupanine                  | [H][C@@]12CCCCN1C[C@H]3C[C@@H]2CN4C(CC[C@@H]([C@]34[H])O)=O                |
| 58 | 7 $\beta$ -hydroxylupanine                   | [H][C@@]12CCCCN1C[C@]3(O)C[C@H]2CN4C(CCC[C@]34[H])=O                       |
| 59 | oxylupanine                                  | [H][C@@]12CCCCN1C[C@H]3C[C@@H]2C[N+](=O)C(CCC[C@]34[H])=O                  |
| 60 | 17 $\alpha$ -hydroxylupanine                 | [H][C@@]12CCCCN1[C@@H]([C@@H]3C[C@H]2CN4C(CCC[C@]34[H])=O)O                |
| 61 | (+)-lupanine                                 | [H][C@@]12CCCCN1C[C@@H]3C[C@H]2CN4C(CCC[C@]34[H])=O                        |

|    |                                                              |                                                                                   |
|----|--------------------------------------------------------------|-----------------------------------------------------------------------------------|
| 62 | $\alpha$ -isolupanine                                        | [H][C@]12CCCCN1C[C@H]3C[C@@H]2CN4C(CCC[C@]34[H])=O                                |
| 63 | 13 $\alpha$ -hydroxylupanine                                 | [H][C@]12CCCC(N1C[C@@H]3C[C@@H]2CN4CC[C@@H](C[C@@]34[H])O)=O                      |
| 64 | 13 $\alpha$ -tigloyloxylupanine                              | [H][C@@]12C[C@@H](OC(/C(C)=C/C)=O)CCN1C[C@H]3C[C@@H]2CN4C(CCC[C@]34[H])=O         |
| 65 | 6,7-dihydroxylupanine                                        | O=C1N2C[C@]([H])(C3)[C@]4([H])CCCCN4C[C@@]3(O)[C@@]2(O)CCC1                       |
| 66 | lanatine A                                                   | [H][C@]12CCCC(N1C[C@@H]3C[C@@H]2CN4CC[C@@H](OC(C5=CC=CC=C5N)=O)C[C@@]34[H])=O     |
| 67 | 13 $\alpha$ - <i>E</i> -cinnamoyloxylupanine                 | [H][C@]12CCCC(N1C[C@@H]3C[C@@H]2CN4CC[C@@H](OC(/C=C/C5=CC=CC=C5)=O)C[C@@]34[H])=O |
| 68 | 13 $\alpha$ -angeloyloxylupanine                             | [H][C@]12CCCC(N1C[C@@H]3C[C@@H]2CN4CC[C@@H](C[C@@]34[H])OC(/C(C)=C/C)=O)=O        |
| 69 | 17-oxolupanine                                               | [H][C@@]12CCCCN1C([C@@H]3C[C@@H]2CN4C(CCC[C@]34[H])=O)=O                          |
| 70 | 13 $\alpha$ - <i>cis</i> -cinnamoyloxylupanine               | [H][C@]12CCCC(N1C[C@@H]3C[C@@H]2CN4CC[C@@H](OC(/C=C/C5=CC=CC=C5)=O)C[C@@]34[H])=O |
| 71 | 13 $\beta$ -methoxylupanine                                  | [H][C@]12CCCC(N1C[C@@H]3C[C@@H]2CN4CC[C@@H](OC)C[C@@]34[H])=O                     |
| 72 | 4 $\alpha$ -hydroxy-13 $\beta$ -methoxylupanine              | [H][C@]12C[C@@H](O)CC(N1C[C@@H]3C[C@@H]2CN4CC[C@@H](OC)C[C@@]34[H])=O             |
| 73 | 3 $\beta$ ,4 $\alpha$ -dihydroxy-13 $\beta$ -methoxylupanine | [H][C@]12C[C@H]([C@H](O)C(N1C[C@@H]3C[C@@H]2CN4CC[C@@H](C[C@@]34[H])OC)=O)O       |
| 74 | 3 $\beta$ ,13 $\beta$ -dihydroxylupanine                     | [H][C@]12CC[C@H](O)C(N1C[C@@H]3C[C@@H]2CN4CC[C@@H](O)C[C@@]34[H])=O               |
| 75 | (-)-3 $\beta$ -Hydroxy-13 $\alpha$ -tigloyloxylupanine       | [H][C@]12CC[C@H](O)C(N1C[C@@H]3C[C@@H]2CN4CC[C@@H](O/C=C(C)/CC=O)C[C@@]34[H])=O   |
| 76 | (+)-15 $\beta$ -hydroxy-17-oxolupanine                       | [H][C@]12CCCC(N1C[C@@H]3C[C@@H]2C(N4[C@@H](O)CCC[C@@]34[H])=O)=O                  |
| 77 | 5 $\alpha$ -hydroxy-7,17-dehydroisolupanine                  | [H][C@]12[C@@H](O)CCC(N1C[C@@H]3CC2=CN4CCCC[C@@]34[H])=O                          |
| 78 | (+)-3 $\alpha$ -hydroxylupanine                              | [H][C@]12CC[C@@H](O)C(N1C[C@@H]3C[C@@H]2CN4CCCC[C@@]34[H])=O                      |
| 79 | 3 $\beta$ -hydroxylupanine                                   | [H][C@]12CC[C@H](O)C(N1C[C@@H]3C[C@@H]2CN4CCCC[C@@]34[H])=O                       |
| 80 | 3 $\beta$ ,13 $\alpha$ -dihydroxylupanine                    | [H][C@]12CC[C@H](O)C(N1C[C@@H]3C[C@@H]2CN4CC[C@@H](O)C[C@@]34[H])=O               |
| 81 | 8 $\alpha$ ,13 $\alpha$ -dihydroxylupanine                   | [H][C@]12CCCC(N1C[C@@H]3C(O)[C@H]2CN4CC[C@@H](O)C[C@@]34[H])=O                    |
| 82 | 3 $\beta$ ,8 $\alpha$ ,13 $\alpha$ -trihydroxylupanine       | [H][C@]12CC[C@H](O)C(N1C[C@@H]3C(O)[C@H]2CN4CC[C@@H](O)C[C@@]34[H])=O             |

|     |                                                                 |                                                                                          |
|-----|-----------------------------------------------------------------|------------------------------------------------------------------------------------------|
| 83  | (+)-13 $\alpha$ -(4'-hydroxytigloyloxy) lupanine                | [H][C@]12CCCC(N1C[C@@H]3C[C@H]2CN4CC[C@H](OC(/C(C)=C/CO)=O)C[C@@]34[H])=O                |
| 84  | 13 $\alpha$ -methoxylupanine                                    | [H][C@]12CCCC(N1C[C@@H]3C[C@H]2CN4CC[C@H](OC)C[C@@]34[H])=O                              |
| 85  | (+)-12 $\alpha$ -Hydroxylupanine                                | [H][C@@]12CCCC(N1C[C@H]3C[C@@H]2CN4CCCC[C@H](O)[C@]34[H])=O                              |
| 86  | lebeckianine                                                    | [H][C@]12C[C@@H](O)[C@H](O)C(N1C[C@@H]3C[C@H]2CN4CCCC[C@@]34[H])=O                       |
| 87  | pearsonine                                                      | [H][C@]12CC([C@@H](C(N1C[C@@H]3C(O)[C@H]2CN4CC[C@H](OC(/C(C)=C/C)=O)C[C@@]34[H])=O)O)[H] |
| 88  | 3 $\beta$ -hydroxylupanine-4 $\alpha$ - <i>O</i> -angelate      | [H][C@]12C[C@H]([C@H](O)C(N1C[C@@H]3C[C@H]2CN4CCCC[C@@]34[H])=O)OC(/C(C)=C\C)=O          |
| 89  | 3 $\beta$ ,13 $\alpha$ -dihydroxylupanine                       | [H][C@]12CC[C@H](O)C(N1C[C@@H]3C[C@H]2CN4CC[C@H](O)C[C@@]34[H])=O                        |
| 90  | 13-(2'-pirroylcarboxyl)calpurmenine                             | [H][C@]12CCCC(N1C[C@@H]3C[C@H]2CN4CC[C@@H]([C@@H](O)[C@@]34[H])OC(C5=CC=CN5)=O)=O        |
| 91  | 8 $\alpha$ -hydroxylupanine-13 $\alpha$ - <i>O</i> -angelate    | [H][C@]12CCCC(N1C[C@@H]3C(O)[C@H]2CN4CC[C@H](OC(/C(C)=C\C)=O)C[C@@]34[H])=O              |
| 92  | Nuttalline                                                      | [H][C@]12C[C@H](O)CC(N1C[C@@H]3C[C@H]2CN4CCCC[C@@]34[H])=O                               |
| 93  | 3 $\beta$ -hydroxylupanine-13 $\alpha$ - <i>O</i> -angelate     | [H][C@]12CC[C@H](O)C(N1C[C@@H]3C[C@H]2CN4CC[C@H](OC(/C(C)=C\C)=O)C[C@@]34[H])=O          |
| 94  | anagryne                                                        | [H][C@]12CCCCN1C[C@H]3C[C@@H]2CN(C3=CC=C4)C4=O                                           |
| 95  | thermopsine                                                     | [H][C@@]12CCCCN1C[C@H]3C[C@@H]2CN(C3=CC=C4)C4=O                                          |
| 96  | sophaline E                                                     | O=C1C=CC=C2N1C[C@H]3C[C@@H]2CN4[C@@]3([H])C[C@H](O)C[C@@]4([H])C(C5=CNC6=C5C=CC=C6)=O    |
| 97  | (-)-13 $\alpha$ -hydroxy-15 $\alpha$ -(1-hydroxyethyl)-anagryne | O=C1C=CC=C2N1C[C@H]3C[C@@H]2CN4[C@@]3([H])C[C@@H](O)C[C@H]4[C@@H](C)O                    |
| 98  | (-)-baptifoline                                                 | O=C1C=CC=C2N1C[C@H]3C[C@@H]2CN4[C@@]3([H])C[C@@H](O)CC4                                  |
| 99  | (-)-epibaptifoline                                              | O=C1C=CC=C2N1C[C@H]3C[C@@H]2CN4[C@@]3([H])C[C@H](O)CC4                                   |
| 100 | (+)-sophazrine                                                  | O=C1C=CC=C2N1C[C@H]3C[C@@H]2CN4[C@@]3([H])CN(C(CCC=C)=O)CC4                              |
| 101 | <i>O</i> -acetylbaptifoline                                     | O=C1C=CC=C2N1C[C@H]3C[C@@H]2CN4[C@@]3([H])C[C@H](OC(C)=O)CC4                             |
| 102 | thermseedline H                                                 | O=C1C=CC=C2N1C[C@H]3C[C@@H]2[C@H](CC(OC)=O)N4[C@@]3([H])CCCC4                            |
| 103 | thermseedline I                                                 | O=C1C=CC=C2N1C[C@H]3C[C@@H]2CN4[C@@]3([H])C[C@@H](O)C[C@@]4([H])C(OC)=O                  |

|     |                                       |                                                                                                 |
|-----|---------------------------------------|-------------------------------------------------------------------------------------------------|
| 104 | thermseedline J                       | <chem>O=C1C=CC=C2N1C[C@H]3C[C@@H]2CN4[C@@]3([H])[C@H](O)C=CC4</chem>                            |
| 105 | thermseedline K                       | <chem>O=C1C=CC=C2N1C[C@H]3C[C@@H]2CN4[C@@]3([H])[C@@H](O5)[C@@H]5CC4</chem>                     |
| 106 | thermseedline L                       | <chem>O=C1C=CC=C2N1C[C@H]([C@@]3([H])N4CCCC3)C[C@@H]2C4=O</chem>                                |
| 107 | thermseedline M                       | <chem>O=C1C=CC=C2N1C[C@H]3C[C@@H]2CN4[C@@]3([H])CC[C@H](O)C4</chem>                             |
| 108 | thermseedline N                       | <chem>O=C1C=CC=C2N1C[C@H]3C[C@@H]2C[N+]4([O-])[C@@]3([H])CCCC4</chem>                           |
| 109 | thermseedline O                       | <chem>O=C1C=CC=C2N1C[C@H]3C[C@@H]2CN4[C@@]3([H])CC(CC4)=O</chem>                                |
| 110 | (+)-sparteine                         | <chem>[H][C@]12N(C[C@H]3C[C@@H]2CN4[C@@]3([H])CCCC4)CCCC1</chem>                                |
| 111 | (-)-sparteine                         | <chem>[H][C@@]12N(C[C@H]3C[C@@H]2CN4[C@@]3([H])CCCC4)CCCC1</chem>                               |
| 112 | (-)-β-isosparteine                    | <chem>[H][C@]12N(C[C@@H]3C[C@H]2CN4[C@@]3([H])CCCC4)CCCC1</chem>                                |
| 113 | (-)-α-sparteine                       | <chem>[H][C@]12N(C[C@H]3C[C@@H]2CN4[C@@]3([H])CCCC4)CCCC1</chem>                                |
| 114 | 11,12-dehydrosparteine                | <chem>[H][C@]12N(C[C@H]3C[C@@H]2CN4C3=CCCC4)CCCC1</chem>                                        |
| 115 | 2-phenyl-2,3-didehydrosparteine       | <chem>[H][C@]12N(C[C@H]3C[C@@H]2CN4[C@@]3([H])CCCC4)C(C5=CC=CC=C5)=CCC1</chem>                  |
| 116 | 15-phenyl-14,15-didehydrosparteine    | <chem>[H][C@]12N(C[C@H]3C[C@@H]2CN4[C@@]3([H])CCC=C4C5=CC=CC=C5)CCCC1</chem>                    |
| 117 | 2-cyano-2-methylsparteine             | <chem>[H][C@]12N(C[C@H]3C[C@@H]2CN4[C@@]3([H])CCCC4)C(C)(C#N)CCC1</chem>                        |
| 118 | 2,17-dimethylsparteine                | <chem>[H][C@]12N(C[C@H]3C[C@@H]2C(C)N4[C@@]3([H])CCCC4)C(C)CCC1</chem>                          |
| 119 | 2-methyl-17-oxosparteine              | <chem>[H][C@]12N(C[C@H]([C@@]3([H])N4CCCC3)C[C@@H]2C4=O)C(C)CCC1</chem>                         |
| 120 | acosminine                            | <chem>[H][C@]12N([C@H](C3=CN(C(C)=O)CCC3)[C@H]4C[C@@H]2CN5[C@@]4([H])C[C@@H](O)CC5)CCCC1</chem> |
| 121 | (-)-aphyllidine                       | <chem>[H][C@]12[C@@H]3C(N4CCCC=C4[C@H](CN1CCCC2)C3)=O</chem>                                    |
| 122 | aphyline                              | <chem>[H][C@]12[C@@H]3C(N4CCCC[C@@]4([H])[C@H](CN1CCCC2)C3)=O</chem>                            |
| 123 | monspessulanine                       | <chem>[H][C@@]12[C@@H]3C(N4CCCC=C4[C@H](CN1CCCC2)C3)=O</chem>                                   |
| 124 | (+)-2,3-dehydro-10-oxo-a-isosparteine | <chem>[H][C@@]12[C@@H]3C(N4C=CCC[C@@]4([H])[C@H](CN1CCCC2)C3)=O</chem>                          |

|     |                                      |                                                                    |
|-----|--------------------------------------|--------------------------------------------------------------------|
| 125 | 7-hydroxy-β-isosparteine             | [H][C@@]12C3([H])C(N4CCCC[C@]4([H])C(CN1CCCC2)(O)C3)=O             |
| 126 | (+)-retamine                         | [H][C@@]12[C@]3(C(N4CCC[C@H](O)[C@@]4([C@H](C3)CN1CCCC2)[H])=O)[H] |
| 127 | 10α-Hydroxymethylsparteine           | [H][C@@]12N([C@@]([H])(CO)[C@H]3C[C@@H]2CN4[C@@]3([H])CCCC4)CCCC1  |
| 128 | 14α-hydroxysparteine                 | [H][C@]12N(C[C@H]3C[C@@H]2CN4[C@]3([H])CC[C@@H](O)C4)CCCC1         |
| 129 | (+)-2β-hydroxyaphylline              | [H][C@]12N(C([C@H]3C[C@@H]2CN4[C@]3([H])CCCC4)=O)[C@@H](O)CCC1     |
| 130 | (+)-13β-hydroxyaphyllidine           | [H][C@@]12[C@H]3C(N4CCCC=C4[C@@H](CN1CC[C@H](O)C2)C3)=O            |
| 131 | oxy- <i>N</i> -methylcytisine        | O=C1C=CC=C2N1C[C@H]3C[C@@H]2C[N+](C)([O-])C3                       |
| 132 | (-)-cytisine                         | O=C1C=CC=C2N1C[C@H]3C[C@@H]2CNC3                                   |
| 133 | <i>N</i> -methylcytisine             | O=C1C=CC=C2N1C[C@H]3C[C@@H]2CN(C)C3                                |
| 134 | <i>N</i> -butylcytisine              | O=C1C=CC=C2N1C[C@H]3C[C@@H]2CN(CCCC)C3                             |
| 135 | (-)-rhombifoline                     | O=C1C=CC=C2N1C[C@H]3C[C@@H]2CN(CCC=C)C3                            |
| 136 | cytisine-12-carboxyethylester        | O=C1C=CC=C2N1C[C@H]3C[C@@H]2CN(C(OCC)=O)C3                         |
| 137 | 11-allylcytisine                     | O=C1C=CC=C2N1C[C@H]3C[C@@H]2CN[C@@H]3CC=C                          |
| 138 | <i>N</i> -methylenedihydroxycytisine | O=C1C=CC=C2N1C([H])([H])[C@@]3([H])C[C@]2([H])CN(CO)C3             |
| 139 | <i>N</i> -formylcytisine             | O=C1C=CC=C2N1C[C@@H]3C[C@@H]2CN(C=O)C3                             |
| 140 | 9-hydroxy- <i>N</i> -methylcytisine  | O=C1C=CC=C2N1C[C@@]3(O)C[C@]2([H])CN(C)C3                          |
| 141 | <i>N</i> -acetylcytisine             | O=C1C=CC=C2N1C[C@H]3C[C@@H]2CN(OC(C)=O)C3                          |
| 142 | <i>N</i> -carboxymethylcytisine      | O=C1C=CC=C2N1C[C@H]3C[C@@H]2CN(CC(O)=O)C3                          |
| 143 | (-)-12-cytisineacetamide             | O=C1C=CC=C2N1C[C@H]3C[C@@H]2CN(CC(N)=O)C3                          |
| 144 | <i>N</i> -hydroxycytisine            | O=C1C=CC=C2N1C[C@H]3C[C@@H]2CN(O)C3                                |
| 145 | sophorasine A                        | O=C1C=CC=C2N1CC3([H])CC2([H])CN(CC([C@](O)([H])C)=O)C3             |



|     |                                           |                                                                                             |
|-----|-------------------------------------------|---------------------------------------------------------------------------------------------|
| 146 | sophorasine B                             | <chem>O=C1C=CC=C2N1CC3([H])CC2([H])CN(CC([C@]([H])(O)C)=O)C3</chem>                         |
| 147 | cytisine-12-carboxy-methylester           | <chem>O=C1C=CC=C2N1C[C@H]3C[C@@H]2CN(C(OC)=O)C3</chem>                                      |
| 148 | thermseedline A                           | <chem>O=C1[C@H]2CN3C(C=CC=C3[C@@H](CN1CCC)C2)=O</chem>                                      |
| 149 | thermseedline B                           | <chem>O=C1[C@H]2CN3C(C=CC=C3[C@@H](CN1CCCO)C2)=O</chem>                                     |
| 150 | thermseedline C                           | <chem>O=C1[C@H]2CN3C(C=CC=C3[C@@H](CN1CCCC(N(CC)CC)=O)C2)=O</chem>                          |
| 151 | thermseedline D                           | <chem>O=C1C=CC=C2N1C[C@H]3C[C@@H]2CN(C4=CCOC4=O)C3</chem>                                   |
| 152 | thermseedline E                           | <chem>O=C1C=CC=C2N1C[C@H]3C[C@@H]2CN(C4=CC=C(CO)N=C4)C3</chem>                              |
| 153 | thermseedline P                           | <chem>O=C1C=CC=C2N1C[C@H]3C[C@@H]2CN(CC(C4=CNC5=C4C=CC=C5)=O)C3</chem>                      |
| 154 | thermseedline Q                           | <chem>O=C1C=CC=C2N1C[C@H]3C[C@@H]2CN(O[C@H]([C@@H]4O)O[C@H](CO)[C@@H](O)[C@@H]4O)C3</chem>  |
| 155 | thermlanseedline G                        | <chem>O=C1[C@H]2CN3C(C=CC=C3[C@@H](CN1CCCC(C)=O)C2)=O</chem>                                |
| 156 | 3-hydroxy-11-norcytisine                  | <chem>O=C1C(O)=CC=C2N1C[C@H]3C[C@@H]2NC3</chem>                                             |
| 157 | kushenine                                 | <chem>O=C1CCC[C@@]2([H])N1C[C@@H]3C[C@H]2CN(C)C3</chem>                                     |
| 158 | tetrahydrocytisine                        | <chem>O=C1CCC[C@@]2([H])N1C[C@H]3C[C@@H]2CNC3</chem>                                        |
| 159 | lupanacosmine                             | <chem>O=C1CCC[C@@]2([H])N1[C@H](C3=CN(C(C)=O)CCC3)[C@@H]4C[C@H]2CN(C)[C@@]4([H])CC=C</chem> |
| 160 | tetrahydrorhombifoline                    | <chem>O=C1CCC[C@@]2([H])N1C[C@@H]3C[C@H]2CN(CCC=C)C3</chem>                                 |
| 161 | angustifoline                             | <chem>O=C1CCC[C@@]2([H])N1C[C@@H]3C[C@H]2CN[C@@]3([H])CC=C</chem>                           |
| 162 | <i>N</i> -methyltetrahydrocytisine epimer | <chem>[H][C@]12N(C[C@H]3C[C@@H]2CN(C)C3)CCCC1</chem>                                        |
| 163 | <i>N</i> -formyltetrahydrocytisine        | <chem>O=C1CCC[C@@]2([H])N1C[C@H]3C[C@@H]2CN(C=O)C3</chem>                                   |
| 164 | <i>N</i> -methyltetrahydrocytisine        | <chem>O=C1CCC[C@@]2([H])N1C[C@H]3C[C@@H]2CN(C)C3</chem>                                     |
| 165 | termisine                                 | <chem>[H][C@]12N(C[C@@H]3C[C@H]2CN(CO)[C@]3([H])CCCC(O)=O)CCCC1</chem>                      |
| 166 | desoxyangustifoline                       | <chem>[H][C@@]12N(C[C@@H]3C[C@H]2CN[C@@]3([H])CC=C)CCCC1</chem>                             |

|     |                                        |                                                                                  |
|-----|----------------------------------------|----------------------------------------------------------------------------------|
| 167 | (-)- $\Delta^5$ -dehydroalbine         | <chem>O=C1C=CN(C[C@@H]2C[C@H]3[C@](CC=C)([H])NC2)C3=C1</chem>                    |
| 168 | (-)-albine                             | <chem>O=C1C=CN(C[C@@H]2C[C@H]3[C@](CC=C)([H])NC2)[C@]3([H])C1</chem>             |
| 169 | 11,12-seco-12,13-didehydromultiflorine | <chem>O=C1C=CN(C[C@@H]2C[C@H]3CN(CCC=C)C2)[C@]3([H])C1</chem>                    |
| 170 | virgilidone                            | <chem>[H][C@@]12N(C([C@]3([H])C[C@@]2([H])CNC3)=O)CCCC1</chem>                   |
| 171 | virgiboidine                           | <chem>[H][C@@]12N(C([C@@H]3C[C@H]2CN(CCC=C)C3)=O)CCCC1</chem>                    |
| 172 | <i>N</i> -methylalbine                 | <chem>O=C1C=CN(C[C@@H]2C[C@H]3[C@](CC=C)([H])N(C)C2)[C@]3([H])C1</chem>          |
| 173 | <i>N</i> -methylangustifoline          | <chem>O=C1CCC[C@@]2([H])N1C[C@@H]3C[C@H]2CN(C)[C@@]3([H])CC=C</chem>             |
| 174 | (-)-lupinine                           | <chem>OC[C@H]1[C@]2([H])N(CCC1)CCCC2</chem>                                      |
| 175 | (+)-epilupinine                        | <chem>OC[C@@H]1[C@]2([H])N(CCC1)CCCC2</chem>                                     |
| 176 | (-)-lusitanine                         | <chem>CC(N/C=C1CCCN2CCCC[C@@]2/1[H])=O</chem>                                    |
| 177 | 2-hydroxylupinine                      | <chem>[H][C@@]12N(CC[C@H](O)[C@@H]2CO)CCCC1</chem>                               |
| 178 | lycocernuskine C                       | <chem>[H][C@@]12N(CCCC2)[C@@H](C)C[C@](C)(O)C1</chem>                            |
| 179 | cermizine C                            | <chem>[H][C@@]12N(CCCC2)[C@@H](C)C[C@@H](C)C1</chem>                             |
| 180 | cermizine D                            | <chem>[H][C@@]12N(CCCC2)[C@](C[C@]3([H])NCCCC3)([H])C[C@@H](C)C1</chem>          |
| 181 | cermizine D N-oxide                    | <chem>[H][C@@]12[N+](CCCC2)([O-])[C@](C[C@]3([H])NCCCC3)([H])C[C@@H](C)C1</chem> |
| 182 | (-)-senepodine G                       | <chem>[H][C@@]12[N+](CCCC2)=C(C)C[C@@H](C)C1</chem>                              |
| 183 | (-)-senepodine H                       | <chem>[H][C@@]12[N+](C[C@H](C[C@H](C)O)CCC2)=C(C)C[C@@H](C)C1</chem>             |
| 184 | (+)-myrtine                            | <chem>[H][C@@]12N([C@H](C)CC(C2)=O)CCCC1</chem>                                  |
| 185 | (-)-epimyrtine                         | <chem>[H][C@@]12N([C@H](C)CC(C2)=O)CCCC1</chem>                                  |
| 186 | (+)-epiquinamide                       | <chem>[H][C@@]12N(CCC[C@@H]2NC(C)=O)CCCC1</chem>                                 |
| 187 | (+)-clavepictine A                     | <chem>[H][C@]12N([C@@H](C)[C@H](OC(C)=O)CC2)[C@H](/C=C\C=C\CCCCC)CCC1</chem>     |

|     |                                                      |                                                                              |
|-----|------------------------------------------------------|------------------------------------------------------------------------------|
| 188 | (+)-clavopictine B                                   | [H][C@]12N([C@@H](C)[C@H](O)CC2)[C@H](/C=C\C=C\CCCCC)CCC1                    |
| 189 | (-)-Pictamine                                        | [H][C@@]12N([C@H](/C=C\C=C\CCCC)CCC2)[C@@H](C)[C@H](OC(C)=O)CC1              |
| 190 | quinolizidine 275I-2                                 | C=CCCC[C@H]1CCCC2N1[C@H](CCCC=C)CCC2                                         |
| 191 | quinolizidine 249F                                   | [H][C@@]12N(CCCC2)C/C(C[C@@H]1O)=C/C=C\C=C                                   |
| 192 | quinolizidine 217A                                   | [H][C@@]12N(CCCC2)[C@H](C/C=C\C#C)CC[C@H]1C                                  |
| 193 | quinolizidine 195C                                   | [H][C@@]12N([C@H](CCC)CCC2)[C@@H](C)CCC1                                     |
| 194 | quinolizidine-207I                                   | [H][C@@]12N(CCCC2)[C@H](CC=C)CC[C@@H]1CC                                     |
| 195 | quinolizidine-231A                                   | [H][C@@]12N(CCCC2)[C@H](C/C=C\C#C)CC[C@@H]1CC                                |
| 196 | quinolizidine-233A                                   | [H][C@@]12N(CCCC2)[C@H](C/C=C\C#C)CC[C@H]1CC                                 |
| 197 | quinolizidine-235E                                   | [H][C@@]12N(CCCC2)[C@H](CCCC=C)CC[C@@H]1C                                    |
| 198 | hupermine A                                          | CN(C)CCCCC[C@H]1C[C@@H](C)C[C@@]2([H])N1CCCC2                                |
| 199 | mamanine                                             | OC[C@H]1C[C@](C2=CC=CC(N2)=O)([H])CN3CCCC[C@@]31[H]                          |
| 200 | pohakuline                                           | OC[C@H]1C[C@](C[C@@]2([H])CCCC(N2)=O)([H])CN3CCCC[C@@]31[H]                  |
| 201 | Jussiaeiine B                                        | [H][C@@]12N(C[C@H](C3=CC=CC(OC)=N3)C[C@@H]2CO)CC([H])C([H])C1                |
| 202 | Jussiaeiine C                                        | [H][C@@]12N(C[C@H](C3=CC=CC(OC)=N3)C[C@@H]2CO)CC([H])[C@@H](O)C1             |
| 203 | Jussiaeiine D                                        | [H][C@@]12N(C[C@H](C3=CC=CC(OC)=N3)C[C@@H]2CO)C[C@@H](O)C([H])C1             |
| 204 | (+)-13 $\beta$ -hydroxymamanine                      | [H][C@@]12N(C[C@H](C3=CC=CC(N3)=O)C[C@@H]2CO)CC[C@@H](O)C1                   |
| 205 | 4-(3-hydroxy-4-methoxyphenyl)-quinolizidin-2-acetate | [H][C@@]12N([C@H](C3=CC=C(OC)C(O)=C3)C[C@@H](OC(C)=O)C2)CCCC1                |
| 206 | julandine                                            | [H][C@]12N(CC(C3=CC=C(OC)C=C3)=C(C4=CC(OC)=C(OC)C=C4)C2)CCCC1                |
| 207 | cylicomorphins A                                     | [H][C@@]12N([C@@H](CC(O)=O)CCC2)[C@@H](C)[C@H](OC(C3=CC=CC=C3)=O)CC1         |
| 208 | cylicomorphins B                                     | [H][C@@]12N([C@@H](CC(O)=O)CCC2)[C@@H](C)[C@H](OC(C3=CC(OC)=C(OC)C=C3)=O)CC1 |

|     |                                                                   |                                                                                                     |
|-----|-------------------------------------------------------------------|-----------------------------------------------------------------------------------------------------|
| 209 | cylicomorphins C                                                  | [H][C@@]12N([C@@H](CC(O)=O)CCC2)[C@@H](C)[C@H](OC(C3=CC=C(OC)C=C3OC)=O)CC1                          |
| 210 | cylicomorphins D                                                  | [H][C@@]12N([C@@H](CC(O)=O)CCC2)[C@@H](C)[C@H](OC(/C=C\C3=CC=CC=C3)=O)CC1                           |
| 211 | cylicomorphins E                                                  | [H][C@@]12N([C@@H](CC(O)=O)CCC2)[C@@H](C)[C@H](OC(/C=C\C3=CC=C(OC)C=C3)=O)CC1                       |
| 212 | (-)-(E)-(3-methoxy-4- $\alpha$ -rhamnosyloxycinnamoyl)epilupinine | [H][C@@]12N(CCC[C@@H]2COC(/C=C/C3=CC=C(OC4O[C@H](C)[C@H](O)[C@H](O)[C@@H]4O)C(OC)=C3)=O)CCCC1       |
| 213 | lamprolobine                                                      | [H][C@]12N(CCC[C@]2([H])CN3C(CCCC3=O)=O)CCCC1                                                       |
| 214 | 17-desoxy-cis-lamprolobine                                        | [H][C@]12N(CCC[C@]2(CN3C(CCCC3)=O)[H])CCCC1                                                         |
| 215 | epilupinine benzoate                                              | [H][C@]12N(CC(C3=CC=C(OC)C=C3)=C(C4=CC(OC)=C(OC)C=C4)C2)CCCC1                                       |
| 216 | nupharidine                                                       | [H][C@@]12[N+](C[C@@H](C)CC2)([O-])[C@H](C3=COC=C3)CC[C@H]1C                                        |
| 217 | deoxynupharidine                                                  | [H][C@@]12N(C[C@@H](C)CC2)[C@H](C3=COC=C3)CC[C@H]1C                                                 |
| 218 | 7-epideoxynupharidine                                             | [H][C@@]12N(C[C@H](C)CC2)C(C3=COC=C3)CC[C@H]1C                                                      |
| 219 | nupharolutine                                                     | [H][C@@]12N(C[C@](C)(O)CC2)[C@H](C3=COC=C3)CC[C@H]1C                                                |
| 220 | nupharic acid                                                     | [H][C@@]12N(C[C@@H](C)CC2)[C@H]([C@H](C=O)/C=C/C(O)=O)CC[C@H]1C                                     |
| 221 | thermlanseedline A                                                | CC(N1CCCC[C@]1([H])[C@@](C2)([H])CN3C(C=CC=C3C2=O)=O)=O                                             |
| 222 | (+)-senepodine A                                                  | [H][C@@]12N([C@H](CC3=C4[C@](N(C)CCC4)([H])C[C@@H](C)C3)CCC2)[C@@H](C)C[C@@H](C)C1                  |
| 223 | (-)-senepodine A                                                  | [H][C@]12N([C@@H](CC3=C4[C@](N(C)CCC4)([H])C[C@H](C)C3)CCC2)[C@H](C)C[C@H](C)C1                     |
| 224 | senepodine B                                                      | [H][C@@]12[N+](C[C@@H](CC3=C4[C@](N(C)CCC4)([H])C[C@@H](C)C3)CCC2)=C(C)C[C@@H](C)C1                 |
| 225 | senepodine C                                                      | [H][C@@]12N([C@H](CC3=C4[C@](N(C)CCC4)([H])C[C@@H](C)C3)CCC2)[C@@H](C)C[C@@H](C)C1                  |
| 226 | senepodine D                                                      | [H][C@@]12N([C@H](CC3=C4[C@](N(C=O)CCC4)([H])C[C@@H](C)C3)CCC2)[C@@H](C)C[C@@H](C)C1                |
| 227 | senepodine E                                                      | [H][C@@]12N([C@H](CC3=C4[C@](N(C(C)=O)CCC4)([H])C[C@@H](C)C3)CCC2)[C@@H](C)C[C@@H](C)C1             |
| 228 | (-)-senepodine F                                                  | [H][C@@]12N([C@H](C[C@]3([H])C[C@H](C)C[C@@]4([H])[C@@]3([H])CCCN4C)CCC2)[C@@H](C)C[C@@H](C)C1      |
| 229 | acetylsenepodine F                                                | [H][C@@]12N([C@H](C[C@]3([H])C[C@H](C)C[C@@]4([H])[C@@]3([H])CCCN4C(C)=O)CCC2)[C@@H](C)C[C@@H](C)C1 |

|     |                                                |                                                                                                                  |
|-----|------------------------------------------------|------------------------------------------------------------------------------------------------------------------|
| 230 | lycochinine A                                  | [H][C@@]12N([C@H](CC3=C4[C@](N(C)CCC4)([H])C[C@@H](C)C3)CCC2)[C@@H](C[C@]5([H])CCCCN5)C[C@@H](C)C1               |
| 231 | lycochinine B                                  | [H][C@@]12N([C@H](CC3=C4[C@](NCCC4)([H])C[C@@H](C)C3)CCC2)[C@@H](C[C@]5([H])CCCCN5)C[C@@H](C)C1                  |
| 232 | lycochinine C                                  | [H][C@@]12N([C@H](C[C@]3([H])C[C@H](C)C[C@@]4([H])[C@@]3([H])CCCN4C=O)CCC2)[C@@H](C[C@]5([H])CCCCN5)C[C@@H](C)C1 |
| 233 | Himeradine A                                   | O=C(C)N1C[C@@H]2[C@@]34CC[C@@H](C[C@@H]5CCCC[C@@H]6N5CCCC6)N=C3C[C@@H]7CCC[C@@]41[C@@H]7C2                       |
| 234 | aloperine                                      | [H][C@]12CCCCN1C[C@@H]3[C@]4([H])NCCCC4=C[C@H]2C3                                                                |
| 235 | ochrocephalamine B                             | [H][C@]12CCCCN1C[C@@H]3[C@]4([H])N(C=O)CCCC4=C[C@H]2C3                                                           |
| 236 | ochrocephalamine C                             | [H][C@]12CCCCN1C[C@@H]3C4=[N+](O-)CCCC4=C[C@H]2C3                                                                |
| 237 | ochrocephalamine F                             | [H][C@@]1(CCCCN21)[C@H](C[C@@H]3C2=O)CC4=C3N=CC=C4                                                               |
| 238 | ochrocephalamine D                             | [H][C@@]12N([C@](C3=O)([H])[C@H]4[C@@](N3CCC5)([H])C5=C[C@H]2C4)CCCC1                                            |
| 239 | (-)-multiflorine                               | [H][C@@]12[C@H](C[C@@H]3CN1CCCC2)CN([C@]3([H])C4)C=CC4=O                                                         |
| 240 | 5,6-didehydromultiflorine                      | [H][C@@]12[C@H](C[C@@H]3CN1CCCC2)CN(C3=C4)C=CC4=O                                                                |
| 241 | 13 $\alpha$ -hydroxy-5,6-didehydromultiflorine | [H][C@@]12[C@H](C[C@@H]3CN1CC[C@H](O)C2)CN(C3=C4)C=CC4=O                                                         |
| 242 | 13 $\alpha$ -hydroxymultiflorine               | [H][C@@]12[C@H](C[C@@H]3CN1CC[C@H](O)C2)CN([C@]3([H])C4)C=CC4=O                                                  |
| 243 | multiflorine <i>N</i> -oxide                   | [H][C@@]12[C@@H](C[C@H]3C[N+]1(O-)CCCC2)CN([C@]3([H])C4)C=CC4=O                                                  |
| 244 | 13 $\alpha$ -tigloyloxymultiflorine            | [H][C@]12[C@H](CN(C=C3)[C@@]4(CC3=O)[H])C[C@H]4CN1CC[C@@H](C2)OC(/C(C)=C/C)=O                                    |
| 245 | leontidine                                     | O=C1C=CC=C2N1C[C@@H]3C[C@H]2CN4[C@]3([H])CCC4                                                                    |
| 246 | camoensine                                     | O=C1C=CC=C2N1C[C@@H]3C[C@@H]2CN4[C@]3([H])CCC4                                                                   |
| 247 | camoensidine                                   | O=C1CCC[C@]2([H])N1C[C@@H]3C[C@@H]2CN4[C@]3([H])CCC4                                                             |
| 248 | $\alpha$ -guianodendrine                       | [H][C@@]12[C@H]3C(N4C=CCC[C@]4([H])[C@@H](CN1CCC2)C3)=O                                                          |
| 249 | $\beta$ -guianodendrine                        | [H][C@@]12[C@@H]3C(N4C=CCC[C@]4([H])[C@H](CN1CCC2)C3)=O                                                          |
| 250 | (-)-camoensidine <i>N</i> -oxide               | O=C1CCC[C@]2([H])N1C[C@@H]3C[C@@H]2C[N+]4(O-)[C@]3([H])CCC4                                                      |

|     |                               |                                                                                                   |
|-----|-------------------------------|---------------------------------------------------------------------------------------------------|
| 251 | velutinine                    | <chem>O=C1C=CC=C2N1C([H])([H])[C@]3([H])C(O)C2=CN4C3=CC5=C4OCO5</chem>                            |
| 252 | lycocernuine <i>N</i> -oxide  | <chem>O=C1CCC[C@]2([H])N1[C@](CC[C@H]3O)([H])[N+](C@]3([H])C[C@H](C)C4)([O-])[C@@]4([H])C2</chem> |
| 253 | cernuine <i>N</i> -oxide      | <chem>O=C1CCC[C@]2([H])N1[C@](CCC3[H])([H])[N+](C@]3([H])C[C@H](C)C4)([O-])[C@@]4([H])C2</chem>   |
| 254 | cernuine                      | <chem>O=C1CCC[C@]2([H])N1[C@](CCC3[H])([H])N(C@]3([H])C[C@H](C)C4)[C@@]4([H])C2</chem>            |
| 255 | 2 $\alpha$ -hydroxycernuine   | <chem>O=C1[C@H](O)CC[C@]2([H])N1[C@](CCC3)([H])N(C@]3([H])C[C@H](C)C4)[C@@]4([H])C2</chem>        |
| 256 | lycocernuine                  | <chem>O=C1CCC[C@]2([H])N1[C@](CC[C@H]3O)([H])N(C@]3([H])C[C@H](C)C4)[C@@]4([H])C2</chem>          |
| 257 | <i>O</i> -acetyllycocernuine  | <chem>O=C1CCC[C@]2([H])N1[C@](CC[C@H]3OC(C)=O)([H])N(C@]3([H])C[C@H](C)C4)[C@@]4([H])C2</chem>    |
| 258 | 14,15-didehydro-lycocernuine  | <chem>O=C1C=CC[C@]2([H])N1[C@](CC[C@H]3O)([H])N(C@]3([H])C=C(C)C4)[C@@]4([H])C2</chem>            |
| 259 | <i>O</i> -Acetylcarolinianine | <chem>O=C1C=CC[C@]2([H])N1[C@](CC[C@H]3OC(C)=O)([H])N(C@]3([H])C=C(C)C4)[C@@]4([H])C2</chem>      |
| 260 | (+)-ormosanine                | <chem>[H][C@@]12NCCC[C@@]1([H])C[C@H](C@]3([H])N(CCCC3)C4)C[C@@]24[C@]5([H])NCCC C5</chem>        |
| 261 | (-)-piptanthine               | <chem>[H][C@]12NCCC[C@]1([H])C[C@@H](C@]3([H])N(CCCC3)C4)C[C@]24[C@@]5([H])NCCCC5</chem>          |
| 262 | (-)-podopetaline              | <chem>[H][C@]12NCCCC1=C[C@@H](C@@]3([H])N(CCCC3)C4)C[C@]24[C@@]5([H])NCCCC5</chem>                |
| 263 | 18-epiormosanine              | <chem>[H][C@@]12NCCC[C@@]1([H])C[C@H](C@]3([H])N(CCCC3)C4)C[C@@]24[C@@]5([H])NCCC CC5</chem>      |
| 264 | (-)-ormosanine                | <chem>[H][C@]12C[C@H]3C[C@](N1CCCC2)(C@@]4([H])NCCCC4)C[C@@]5([H])NCCC[C@@]53[H]</chem>           |
| 265 | (+)-pipthanthine              | <chem>[H][C@]12C[C@@H]3C[C@@](N1CCCC2)(C@]4([H])NCCCC4)C[C@]5([H])NCCC[C@]53[H]</chem>            |
| 266 | (-)-templetine                | <chem>[H][C@@]12C[C@H]3C[C@](N1CCCC2)(C@@]4([H])NCCCC4)C[C@]5([H])NCCC[C@@]53[H]</chem>           |
| 267 | homoormosanine                | <chem>[H][C@@]12N3CCC[C@@]1([H])C[C@H](C@]4([H])N(CCCC4)C5)C[C@@]25[C@]6([H])N(CC CC6)C3</chem>   |
| 268 | homo-18-epiormosanine         | <chem>[H][C@@]12N3CCC[C@@]1([H])C[C@H](C@]4([H])N(CCCC4)C5)C[C@@]25[C@@]6([H])N(C CCC6)C3</chem>  |
| 269 | homopiptanthine               | <chem>[H][C@]12N3CCC[C@]1([H])C[C@@H](C@]4([H])N(CCCC4)C5)C[C@]25[C@@]6([H])N(CCCC 6)C3</chem>    |
| 270 | (+)-jamine                    | <chem>[H][C@]12N3CCC[C@]1([H])C[C@@H](C@@]4([H])N(CCCC4)C5)C[C@]25[C@@]6([H])N(CC CC6)C3</chem>   |
| 271 | panamine                      | <chem>[H][C@@]12C3N(C(N4)CCCC4[C@@]3(C5)C[C@H](C@@]6([H])N5CCCC6)C2)CCC1</chem>                   |

|     |                                           |                                                                                                                         |
|-----|-------------------------------------------|-------------------------------------------------------------------------------------------------------------------------|
| 272 | 15β-hydroxycryptopleurine <i>N</i> -oxide | <chem>COC(C=C1)=CC2=C1C(C[N+](CCCC3)([O-])[C@@]3([H])[C@]4([H])O)=C4C5=C2C=C(OC)C(OC)=C5</chem>                         |
| 273 | pileamartine C                            | <chem>COC(C=C1)=CC2=C1C(CN(CCCC3)[C@]3([H])C4)=C4C5=C2C(OC)=C(OC)C=C5</chem>                                            |
| 274 | pileamartine D                            | <chem>COC(C=C1)=CC2=C1C(CN(CCCC3)[C@]3([H])C4)=C4C5=C2C=C(O)C(OC)=C5</chem>                                             |
| 275 | (+)-cryptopleurine                        | <chem>COC(C=C1)=CC2=C1C(CN(CCCC3)[C@]3([H])C4)=C4C5=C2C=C(OC)C(OC)=C5</chem>                                            |
| 276 | 6-O-desmethylecryptopleurine              | <chem>OC(C=C1)=CC2=C1C(CN(CCCC3)[C@@]3([H])C4)=C4C5=C2C=C(OC)C(OC)=C5</chem>                                            |
| 277 | (-)-cryptopleurine                        | <chem>COC(C=C1)=CC2=C1C(CN(CCCC3)[C@@]3([H])C4)=C4C5=C2C=C(OC)C(OC)=C5</chem>                                           |
| 278 | boeshmeriasin A                           | <chem>COC(C(OC)=C1)=CC2=C1C(CN(CCCC3)[C@@]3([H])C4)=C4C5=C2C=C(OC)C=C5</chem>                                           |
| 279 | boeshmeriasin B                           | <chem>OC(C(OC)=C1)=CC2=C1C(CN(CCCC3)[C@@]3([H])C4)=C4C5=C2C=C(OC)C=C5</chem>                                            |
| 280 | acosmine                                  | <chem>C=CC[C@@H]1[N@@]2[C@@H]3[C@@H]4C[C@H]1C[N@@]([C@H]4CCCCO)[C@H]2CC/C3=C\NC(C)=O</chem>                             |
| 281 | acosmine acetate                          | <chem>C=CC[C@@H]1[N@@]2[C@@H]3[C@@H]4C[C@H]1C[N@@]([C@H]4CCCCOC(C)=O)[C@H]2CC/C3=C\NC(C)=O</chem>                       |
| 282 | bovdichine                                | <chem>C=CC[C@@H]1[N@@]2[C@@H]3[C@@H]4C[C@H]1C[N@@]([C@H]4CCCCOC(C5=CC(OC)=C(OC)C(OC)=C5)=O)[C@H]2CC/C3=C\NC(C)=O</chem> |
| 283 | dasycarpumine                             | <chem>C=CC[C@@H]1[N@@]2[C@@H]3[C@@H]4C[C@H]1C[N@@]([C@H]4CC=C)[C@H]2CC/C3=C\NC(C)=O</chem>                              |
| 284 | panacosmine                               | <chem>C=CC[C@@H]1[C@@H]2C[C@H]3[C@H]4[N@]([C@H](CCC4)[N@@]1C3)[C@H]2C5=CN(C(C)=O)CCC5</chem>                            |
| 285 | neosecurinane                             | <chem>[H][C@@]12N([C@H](C3)CC[C@]24C3=CCO4)CCCC1</chem>                                                                 |
| 286 | (+)-2-episecurinol A                      | <chem>O=C(O1)C=C2[C@]31[C@]4([H])N([C@H](C2)[C@@H](O)C3)CCCC4</chem>                                                    |
| 287 | (-)-2-episecurinol A                      | <chem>[H][C@]12N([C@@H](C3)[C@H](O)C[C@@]24C3=CC(O4)=O)CCCC1</chem>                                                     |
| 288 | secua'mamine E                            | <chem>O=C(O1)C=C2[C@]31[C@@]4([H])N([C@H](C2)[C@H](O)C3)CCCC4</chem>                                                    |
| 289 | virosine A                                | <chem>O=C(O1)C=C2[C@@]31[C@]4([H])N([C@@H](C2)[C@@H](O)C3)CCCC4</chem>                                                  |
| 290 | (-)-securinol A                           | <chem>O=C(O1)C=C2[C@]31[C@@]4([H])N([C@H](C2)[C@@H](O)C3)CCCC4</chem>                                                   |
| 291 | (+)-securinol A                           | <chem>O=C(O1)C=C2[C@@]31[C@]4([H])N([C@@H](C2)[C@H](O)C3)CCCC4</chem>                                                   |
| 292 | (+)-virosine B                            | <chem>O=C(O1)C=C2[C@]31[C@]4([H])N([C@H](C2)[C@H](O)C3)CCCC4</chem>                                                     |

|     |                                         |                                                                                                             |
|-----|-----------------------------------------|-------------------------------------------------------------------------------------------------------------|
| 293 | (-)-virosine B                          | <chem>O=C(O1)C=C2[C@@]31[C@@]4([H])N([C@@H](C2)[C@@H](O)C3)CCCC4</chem>                                     |
| 294 | (±)-β-myriafabral A (13β-OH anomer)     | <chem>O[C@H]1O[C@H]2[C@@H]3[C@@]4([H])CCCCN4C[C@]2(CCC3)CC1</chem>                                          |
| 295 | (±)-α-myriafabral A (13α-OH anomer)     | <chem>O[C@@H]1O[C@H]2[C@@H]3[C@@]4([H])CCCCN4C[C@]2(CCC3)CC1</chem>                                         |
| 296 | (±)-β-myriafabral B (13β-OH anomer)     | <chem>O[C@H]1O[C@H]2[C@@H]3[C@@]4([H])CCCCN4C[C@]2(CCC3)C[C@@]1([H])CN(CC)CC</chem>                         |
| 297 | (±)-α-myriafabral B (13α-OH anomer)     | <chem>O[C@@H]1O[C@H]2[C@@H]3[C@@]4([H])CCCCN4C[C@]2(CCC3)C[C@@]1(CN(CC)CC)[H]</chem>                        |
| 298 | flavesine G                             | <chem>OC(CCCC1=NC=C2C3=C1CCCN3CCC2)=O</chem>                                                                |
| 299 | flavesine H                             | <chem>OC(CCC[C@@](N=C1)([H])[C@]2([H])CCCN3CCCC1=C32)=O</chem>                                              |
| 300 | flavesine I                             | <chem>OC(CCCC1=NC[C@]2([H])C3=C1CCCN3CCC2)=O</chem>                                                         |
| 301 | flavesine J                             | <chem>O=C(N1CCCCC1)CCCC2=NC=C3C4=C2CCCN4CCC3</chem>                                                         |
| 302 | alopecurine A                           | <chem>O=C1CCC[C@](N1C2)([H])[C@]3(O)CCCN(C3=O)CCCC2=O</chem>                                                |
| 303 | alopecurine B                           | <chem>O=C1CCC[C@]2([H])C(CCCN(C3=O)CCC[C@]3(O)CN21)=O</chem>                                                |
| 304 | ochrocephalamine E                      | <chem>O=C1CC[C@]2([H])[C@]3([H])[C@]4([H])[C@](CCCN4CCC3)([H])CN21</chem>                                   |
| 305 | 14α-hydroxydecodine                     | <chem>O=C(C[C@@H]1O)O[C@@H]2C[C@@H](C3=CC([H])=C(OC)C(O)=C3C4=C(O)C=CC1=C4)N5CCCC([H])[C@@]5([H])C2</chem>  |
| 306 | 14β-hydroxydecodine                     | <chem>O=C(C[C@H]1O)O[C@@H]2C[C@@H](C3=CC([H])=C(OC)C(O)=C3C4=C(O)C=CC1=C4)N5CCCC([H])[C@@]5([H])C2</chem>   |
| 307 | 4"-O-demethylheimidine                  | <chem>O=C(C[C@@H]1O)O[C@@H]2C[C@@H](C3=CC(O)=C(OC)C=C3C4=C(O)C=CC1=C4)N5CCCC[C@@]5([H])C2</chem>            |
| 308 | 4"-O-demethyl-9β-hydroxyvertine         | <chem>O=C(/C=C\1)O[C@@H]2C[C@@H](C3=CC(O)=C(OC)C=C3C4=C(O)C=CC1=C4)N5CCCC[C@@H](O)[C@]5([H])C2</chem>       |
| 309 | 4"-O-demethylvertine N-oxide            | <chem>O=C(/C=C\1)O[C@@H]2C[C@@H](C3=CC(O)=C(OC)C=C3C4=C(O)C=CC1=C4)[N+]5([O-])CCCC([H])[C@]5([H])C2</chem>  |
| 310 | 4"-O-demethyl-9β-hydroxyvertine N-oxide | <chem>O=C(/C=C\1)O[C@@H]2C[C@@H](C3=CC(OC)=C(OC)C=C3C4=C(O)C=CC1=C4)[N+]5([O-])CCCC([H])[C@]5([H])C2</chem> |
| 311 | 4"-O-demethyllythridine                 | <chem>O=C(C[C@@H]1O)O[C@@H]2C[C@@H](C3=CC(O)=C(OC)C=C3C4=C(O)C=CC1=C4)N5CCCC[C@@]5([H])C2</chem>            |
| 312 | 4"-O-demethyllythridine N-oxide         | <chem>O=C(C[C@@H]1O)O[C@@H]2C[C@@H](C3=CC(O)=C(OC)C=C3C4=C(O)C=CC1=C4)N5CCCC[C@@]5([H])C2</chem>            |
| 313 | 14- <i>epi</i> -4"-O-demethyllythridine | <chem>O=C(C[C@H]1O)O[C@@H]2C[C@@H](C3=CC(O)=C(OC)C=C3C4=C(O)C=CC1=C4)N5CCCC[C@@]5([H])C2</chem>             |



|     |                                                                        |                                                                                                               |
|-----|------------------------------------------------------------------------|---------------------------------------------------------------------------------------------------------------|
| 314 | 14- <i>epi</i> -4"- <i>O</i> -demethyl- 14- <i>O</i> -methyllythridine | <chem>O=C(C[C@@H]1OC)O[C@@H]2C[C@@H](C3=CC(O)=C(OC)C=C3C4=C(O)C=CC1=C4)N5CCCC[C@@]5([H])C2</chem>             |
| 315 | 5- <i>epi</i> -dihydrolyfoline N-oxide                                 | <chem>O=C(CC1)O[C@@H]2C[C@@](C3=CC(O)=C(OC)C([H])=C3C4=C(O)C=CC1=C4)([H])[N+]5([O-])CCCC[C@@]5([H])C2</chem>  |
| 316 | decamine N-oxide                                                       | <chem>O=C(CC1)O[C@@H]2C[C@@](C3=CC(OC)=C(OC)C([H])=C3C4=C(O)C=CC1=C4)([H])[N+]5([O-])CCCC[C@@]5([H])C2</chem> |
| 317 | lagerstroemine N-oxide                                                 | <chem>O=C(CC1)O[C@@H]2C[C@@](C3=CC([H])=C(OC)C(OC)=C3C4=C(O)C=CC1=C4)([H])[N+]5([O-])CCCC[C@@]5([H])C2</chem> |
| 318 | 9β-hydroxyvertine                                                      | <chem>O=C(/C=C\1)O[C@@H]2C[C@@H](C3=CC(OC)=C(OC)C([H])=C3C4=C(O)C=CC1=C4)N5CCCC[C@@H](O)[C@@]5([H])C2</chem>  |
| 319 | lythrine                                                               | <chem>O=C(/C=C\1)O[C@@H]2C[C@@H](C3=CC(OC)=C(OC)C([H])=C3C4=C(O)C=CC1=C4)N5CCCC([H])[C@@]5([H])C2</chem>      |
| 320 | α-dehydrodecodine                                                      | <chem>O=C(/C=C\1)O[C@@H]2C[C@@H](C3=CC=C(OC)C(O)=C3C4=C(O)C=CC1=C4)N5CCCC[C@@]5([H])C2</chem>                 |
| 321 | lythridine                                                             | <chem>O=C(C[C@@H]1O)O[C@@H]2C[C@@H](C3=CC(OC)=C(OC)C=C3C4=C(O)C=CC1=C4)N5CCCC[C@@]5([H])C2</chem>             |
| 322 | vertine                                                                | <chem>O=C(/C=C\1)O[C@@H]2C[C@@H](C3=CC(OC)=C(OC)C=C3C4=C(O)C=CC1=C4)N5CCCC[C@@]5([H])C2</chem>                |
| 323 | heimidine                                                              | <chem>O=C(C[C@@H]1O)O[C@@H]2C[C@@H](C3=CC(OC)=C(OC)C=C3C4=C(O)C=CC1=C4)N5CCCC[C@@]5([H])C2</chem>             |
| 324 | lyfoline                                                               | <chem>O=C(/C=C\1)O[C@@H]2C[C@@H](C3=CC(O)=C(OC)C=C3C4=C(O)C=CC1=C4)N5CCCC[C@@]5([H])C2</chem>                 |
| 325 | <i>epi</i> -lyfoline                                                   | <chem>O=C(/C=C\1)O[C@@H]2C[C@@H](C3=CC(O)=C(OC)C=C3C4=C(O)C=CC1=C4)N5CCCC[C@@]5([H])C2</chem>                 |
| 326 | 4"- <i>O</i> -demethyl-14-hydroxyvertaline.                            | <chem>O=C(C[C@@H]1O)O[C@@H]2C[C@@H](C3=CC(O)=C(OC)C=C3OC4=CC1=CC=C4)N5CCCC[C@@]5([H])C2</chem>                |
| 327 | 14-hydroxylagerine                                                     | <chem>O=C(C[C@@H]1O)O[C@@H]2C[C@@H](C3=CC=C(OC)C(O)=C3OC4=CC1=CC=C4)N5CCCC[C@@]5([H])C2</chem>                |
| 328 | 4"- <i>O</i> -demethyl-14-hydroxydecaline.                             | <chem>O=C(C[C@@H]1O)O[C@@H]2C[C@@H](C3=CC(O)=C(OC)C=C3OC4=CC1=CC=C4)N5CCCC[C@@]5([H])C2</chem>                |
| 329 | lagerine N-oxide                                                       | <chem>O=C(CC1)O[C@@H]2C[C@@](C3=CC=C(OC)C(O)=C3OC4=CC=C1C=C4)([H])[N+]5([O-])CCCC[C@@]5([H])C2</chem>         |
| 330 | vertaline                                                              | <chem>O=C(CC1)O[C@@H]2C[C@@H](C3=CC(OC)=C(OC)C=C3OC4=CC1=CC=C4)N5CCCC[C@@]5([H])C2</chem>                     |
| 331 | lagerine                                                               | <chem>O=C(CC1)O[C@@H]2C[C@@H](C3=CC=C(OC)C(O)=C3OC4=CC1=CC=C4)N5CCCC[C@@]5([H])C2</chem>                      |
| 332 | decaline                                                               | <chem>O=C(CC1)O[C@@H]2C[C@@H](C3=CC(OC)=C(OC)C=C3OC4=CC1=CC=C4)N5CCCC[C@@]5([H])C2</chem>                     |
| 333 | araguspongine A                                                        | <chem>[H][C@]12N(CCC[C@@H]2CCCCC3)CC[C@@H](CCCC[C@@]4(O)CCCN5[C@@]4([H])O[C@@H]3CC5)O1</chem>                 |

|     |                                   |                                                                                                  |
|-----|-----------------------------------|--------------------------------------------------------------------------------------------------|
| 334 | araguspongine B                   | [H][C@@]12N(CCC[C@H]2CCCCC3)CC[C@H](CCCCC[C@@H]4CCCN5[C@@]4([H])O[C@@H]3CC5)O1                   |
| 335 | araguspongine C                   | [H][C@]12N(CCC[C@]2(O)CCCCC3)CC[C@@H](CCCCC[C@@]4(O)CCCN5[C@@]4([H])O[C@H]3CC5)O1                |
| 336 | araguspongine D                   | [H][C@@]12N(CCC[C@H]2CCCCC3)CC[C@H](CCCCC[C@H]4CCCN5[C@@]4([H])O[C@@H]3CC5)O1                    |
| 337 | (+)-araguspongine E               | [H][C@]12N(CCC[C@@H]2CCCCC3)CC[C@@H](CCCCC[C@H]4CCCN5[C@@]4([H])O[C@H]3CC5)O1                    |
| 338 | (-)-araguspongine E               | [H][C@@]12N(CCC[C@H]2CCCCC3)CC[C@H](CCCCC[C@@H]4CCCN5[C@@]4([H])O[C@@H]3CC5)O1                   |
| 339 | araguspongine F                   | [H][C@]12N(CCC[C@H]2CCCCC3)CC[C@@H](CCCCC[C@@H]4CCCN5[C@@]4([H])O[C@H]3[C@@H](C)C5)O1            |
| 340 | araguspongine G                   | [H][C@]12N(CCC[C@H]2CCCCC3)CC[C@@H](CCCCC[C@@H]4CCCN5[C@@]4([H])O[C@H]3[C@H](C)C5)O1             |
| 341 | araguspongine H                   | [H][C@]12N(CCC[C@H]2CCCCC3)C[C@H](C)[C@@H](CCCCC[C@@H]4CCCN5[C@@]4([H])O[C@H]3[C@H](C)C5)O1      |
| 342 | araguspongine J                   | [H][C@]12N(CCC[C@H]2CCCCC3)C[C@@H](C)[C@H](CCCCC[C@@H]4CCCN5[C@@]4([H])O[C@H]3[C@H](C)C5)O1      |
| 343 | araguspongine K                   | [H][C@]12N(CCC[C@H]2CCCCC3)CC[C@@H](CCCCC[C@@]4(O)CCC[N@+]5([O-])[C@@]4([H])O[C@H]3CC5)O1        |
| 344 | araguspongine L                   | [H][C@]12N(CCC[C@]2(O)CCCCC3)CC[C@@H](CCCCC[C@@]4(O)CCC[N+](O-)[C@@]4([H])O[C@H]3CC5)O1          |
| 345 | araguspongine M                   | [H][C@]12N(CCC[C@H]2CCCCC3)CC[C@H](CCCCC[C@@H]4CCCN5[C@@]4([H])O[C@@H]3CC5)O1                    |
| 346 | araguspongine N                   | [H][C@]12N(CCC[C@]2(O)CCCCC3)C[C@H](C)[C@@H](CCCCC[C@@]4(O)CCCN5[C@@]4([H])O[C@H]3[C@@H](C)C5)O1 |
| 347 | araguspongine O                   | [H][C@]12N(CCC[C@@H]2CCCCC3)C[C@H](C)[C@H](CCCCC[C@@]4(O)CCCN5[C@@]4([H])O[C@H]3[C@@H](C)C5)O1   |
| 348 | araguspongine P                   | [H][C@]12N(CCC[C@]2(O)CCCCC3)C[C@H](C)[C@@H](CCCCC[C@@]4(O)CCCN5[C@@]4([H])O[C@H]3CC5)O1         |
| 349 | meso-araguspongine C              | [H][C@@]12N(CCC[C@@]2(O)CCCCC3)CC[C@H](CCCCC[C@@]4(O)CCCN5[C@@]4([H])O[C@H]3CC5)O1               |
| 350 | 3 $\alpha$ -methylaraguspongine C | [H][C@]12N(CCC[C@]2(O)CCCCC3)CC[C@@H](CCCCC[C@@]4(O)CCCN5[C@@]4([H])O[C@H]3[C@@H](C)C5)O1        |
| 351 | xestospongine A                   | [H][C@@]12N(CCC[C@@H]2CCCCC3)CC[C@H](CCCCC[C@H]4CCCN5[C@@]4([H])O[C@@H]3CC5)O1                   |
| 352 | xestospongine B                   | [H][C@@]12N(CCC[C@H]2CCCCC3)C[C@@H](C)[C@H](CCCCC[C@]4(O)CCCN5[C@@]4([H])O[C@@H]3CC5)O1          |
| 353 | xestospongine C                   | [H][C@@]12N(CCC[C@@H]2CCCCC3)CC[C@H](CCCCC[C@@H]4CCCN5[C@@]4([H])O[C@@H]3CC5)O1                  |

|     |                                      |                                                                                                                                      |
|-----|--------------------------------------|--------------------------------------------------------------------------------------------------------------------------------------|
| 354 | xestospongine D                      | [H][C@@]12N(CCC[C@@H]2CCCCC3)CC[C@H](CCCCC[C@@]4(O)CCCN5[C@@]4([H])O[C@@H]3CC5)O1                                                    |
| 355 | xestospongine E                      | [H][C@@]12N(CCC[C@]2(O)CCCCC3)CC[C@@H](CCCCC[C@@]4(O)CCCN5[C@@]4([H])O[C@@H]3CC5)O1                                                  |
| 356 | xestospongine F                      | [H][C@@]12[N@+](CCC[C@]2(O)CCCCC3)([O-])CC[C@@H](CCCCC[C@@]4(O)CCCN5[C@@]4([H])O[C@@H]3CC5)O1                                        |
| 357 | xestospongine G                      | [H][C@@]12[N@+](CCC[C@]2(O)CCCCC3)([O-])CC[C@@H](CCCCC[C@@]4(O)CCCN5[C@@]4([H])O[C@@H]3CC5)O1                                        |
| 358 | xestospongine H                      | [H][C@@]12N(CCC[C@@H]2CCCCC3)CC[C@@H](CCCCC[C@@H]4CCCN5[C@@]4([H])O[C@@H]3[C@@H](C)C5)O1                                             |
| 359 | xestospongine I                      | [H][C@@]12N(CCC[C@]2(O)CCCCC3)CC[C@@H](CCCCC[C@@H]4CCCN5[C@@]4([H])O[C@@H]3[C@@H](C)C5)O1                                            |
| 360 | (+)-7S-hydroxyxestospongine A        | [H][C@]12N(CCC[C@@H]2CCCCC3)CC[C@@H](CCCCC[C@@H]4C[C@H](O)CN5[C@@]4([H])O[C@@H]3CC5)O1                                               |
| 361 | demethylxestospongine B              | [H][C@@]12N(CCC[C@@H]2CCCCC3)CC[C@H](CCCCC[C@@]4(O)CCCN5[C@@]4([H])O[C@@H]3CC5)O1                                                    |
| 362 | 3β,3'β-dimethylxestospongine C       | [H][C@]12N(CCC[C@@H]2CCCCC3)C[C@@H](C)[C@H](CCCCC[C@@]4CCCN5[C@@]4([H])O[C@@H]3[C@@H](C)C5)O1                                        |
| 363 | 9'epi-3β,3'β-dimethylxestospongine C | [H][C@]12N(CCC[C@@H]2CCCCC3)C[C@@H](C)[C@H](CCCCC[C@@]4CCCN5[C@@]4([H])O[C@@H]3[C@@H](C)C5)O1                                        |
| 364 | petrosin                             | [H][C@]1([C@@H]2CCCC[C@@H]3CCCN4C[C@H](C)C5=O)[C@H](CCCC[C@@]5[C@@]43[H])CCCN1C[C@@H](C)C2=O                                         |
| 365 | petrosin A                           | [H][C@@]1([C@@H]2CCCC[C@@H]3CCCN4C[C@H](C)C5=O)[C@@H](CCCC[C@@]5[C@@]43[H])CCCN1C[C@@H](C)C2=O                                       |
| 366 | petrosin B                           | [H][C@@]1([C@@H]2CCCC[C@@H]3CCCN4C[C@H](C)C5=O)[C@@H](CCCC[C@@]5[C@@]43[H])CCCN1C[C@@H](C)C2=O                                       |
| 367 | xestosin A                           | [H][C@]1([C@]2([H])CCCC[C@@]3([H])CCCN4C[C@](C)([H])C5=O)[C@@](CCCC[C@@]5([H])[C@@]43[H])([H])CCCN1C[C@@H](C)C2=O                    |
| 368 | neopetrosiasin A                     | [H][C@]1([C@]2([H])CCCC[C@@]3([H])CCCN4C[C@](C)C5=O)[C@@](CCCC[C@@]5([H])[C@@]43[H])([H])CCCN1C[C@@H](C)C2=O                         |
| 369 | neopetrosiasin B                     | [H][C@]1([C@]2([H])CCCC[C@@]3([H])CCCN4C[C@](C)C5=O)[C@@](CCCC[C@@]5([H])[C@@]43[H])([H])CCCN1C[C@@H](C)C2=O                         |
| 370 | thermlanseedline B                   | O=C1C=CC=C2N1C[C@@H]3C[C@@]24[C@@]([C@@](CC([C@]5([H])N6C[C@@H]7C[C@@H]5CN8C7=CC=CC8=O)=O)([H])[C@@]6([H])O4)([H])N9[C@@]3([H])CCCC9 |
| 371 | thermlanseedline C                   | O=C1C=CC=C2N1C[C@@H]3C[C@@]2CN4[C@@]3([H])[C@@](/C=C/CN(C[C@@H]5C[C@@H]6CN7C5=CC=CC7=O)C6=O)(O)CCC4                                  |
| 372 | thermlanseedline D                   | O=C1C=CC=C2N1C[C@@H]3C[C@@]2CN4[C@@]3([H])[C@@](/C=C/CN(C[C@@H]5C[C@@H]6CN7C5=CC=CC7=O)C6=O)(O)CCC4                                  |
| 373 | thermlanseedline E                   | O=C1[C@@H]2CN3C(C=CC=C3[C@@H](CN1CCCC(CCCN4C[C@@H]5C6=CC=CC(N6C[C@@H](C4=O)C5)=O)=O)C2)=O                                            |

|     |                                 |                                                                                                                                                              |
|-----|---------------------------------|--------------------------------------------------------------------------------------------------------------------------------------------------------------|
| 374 | thermlanseedline F              | O=C1[C@H]2CN3C(C=CC=C3[C@@H](CN1CCCC(/C=C/CCN(C[C@H]4C[C@@H]5CN6C4=CC=CC6=O)C5=O)=O)C2)=O                                                                    |
| 375 | thermseedline F                 | O=C1[C@H]2CN3C(C=CC=C3[C@@H](CN1CCCC(CCN(C[C@H]4C[C@@H]5CN6C4=CC=CC6=O)C5=O)=O)C2)=O                                                                         |
| 376 | thermseedline G                 | O=C1[C@H]2CN3C(C=CC=C3[C@@H](CN1CCCC(OCCCN(C[C@H]4C[C@@H]5CN6C4=CC=C6=O)C5=O)=O)C2)=O                                                                        |
| 377 | alopecuroides B                 | O=C1CCC[C@](N1C2)([H])[C@@]3([H])[C@H]4[C@]([C@@]5([H])CC[C@]6([H])[C@]7([H])N5CCC[C@]7([H])[C@](CCCC8=O)([H])N8C6)(O4)[C@H](C#N)N9CCC[C@]2([H])[C@]93[H]    |
| 378 | alopecuroides A                 | [H][C@]1([C@@]23[C@H](O3)[C@]4([H])[C@]5([H])N(CCC[C@]5([H])[C@](CCCC6=O)([H])N6C4)[C@@H]2C#N)N7CCC[C@]8([H])[C@@]7([H])[C@]([C@](CCCC9=O)([H])N9C8)([H])CC1 |
| 379 | alopecuroides C                 | O=C1CCC[C@](N1C2)([H])[C@@]3([H])CC([C@@]4([H])CC[C@]5([H])[C@]6([H])N4CCC[C@]6([H])[C@](CCCC7=O)([H])N7C5)=CN8CCC[C@]2([H])[C@]83[H]                        |
| 380 | alopecuroides D                 | [H][C@]1(C2=CN(CCC[C@]3([H])[C@](CCCC4=O)([H])N4C5)[C@@]3([H])[C@@]5([H])C2)N6CC[C@]7([H])[C@@]6([H])[C@]([C@](CCCC8=O)([H])N8C7)([H])CC1                    |
| 381 | alopecuroides E                 | O=C1CCC[C@](N1C2)([H])[C@@]3([H])CCN4C[C@@]([H])(CCC[C@]5([H])CN6[C@@](CCC6=O)([H])[C@]7([H])[C@@]5([H])NCCC7)C[C@]2([H])[C@]43[H]                           |
| 382 | ochrocephalamine A              | [H][C@]12[C@]3([H])N(CCC[C@]3([H])C(N4C2)=CC=C([C@]5([H])CC(N(C[C@@]6([H])[C@@]7([H])[C@]8([H])CCCN7CCC6)[C@]8([H])C5=O)C4=O)CCC1                            |
| 383 | sophaline I                     | [H][C@]12[C@]3([H])N(CCC[C@]3([H])[C@](CC=C([C@]4([H])N5CCC[C@]6([H])[C@@]5([H])[C@]([C@](CC=CC7=O)([H])N7C6)([H])CC4)C8=O)([H])N8C2)CCC1                    |
| 384 | sophoraline A                   | O=C1C=CC([C@H]2[C@@H]3C(N(C[C@@]4([H])[C@@]5([H])[C@]6([H])CCCN5CCC4)[C@]6([H])C2)=O)[C@]3(N1C7)[C@@]8([H])CCCN9CCC[C@]7([H])[C@]98[H]                       |
| 385 | sophoraline B                   | O=C1CCC([C@H]2[C@@H]3C(N(C[C@@]4([H])[C@@]5([H])[C@]6([H])CCC[N+]5([O-])CCC4)[C@]6([H])C2)=O)[C@]3(N1C7)[C@@]8([H])CCCN9CCC[C@]7([H])[C@]98[H]               |
| 386 | sophoraline C                   | O=C1CCC([C@H]2[C@@H]3C(N(C[C@@]4([H])[C@@]5([H])[C@]6([H])CCCN5CCC4)[C@]6([H])C2)=O)[C@]3(N1C7)[C@@]8([H])CCCN9CCC[C@]7([H])[C@]98[H]                        |
| 387 | sophaline G                     | O=C1CCC[C@]2([H])[C@](CC3=CC(CCC4)=C(N4CCC5)C5=C3)([H])[C@@]6([H])NCCC[C@]6([H])CN21                                                                         |
| 388 | sophaline H                     | O=C1CCC[C@]2([H])[C@](CC3=CC(CCC4)=C(N4CCC5)C5=C3)([H])[C@@]6([H])NCCC[C@]6([H])CN21                                                                         |
| 389 | thiobinupharidine               | C[C@H](CC[C@H]1C2=COC=C2)[C@](N1C3)([H])CC[C@@]43C[C@]5(CS4)CN6[C@H](C7=CO C=C7)CC[C@@H](C)[C@]6([H])CC5                                                     |
| 390 | syn-thiobinupharidine sulfoxide | C[C@H](CC[C@H]1C2=COC=C2)[C@](N1C3)([H])CC[C@@]43C[C@]5(C[S@]4=O)CN6[C@H](C7=CO C=C7)CC[C@@H](C)[C@]6([H])CC5                                                |
| 391 | 6-hydroxythiobinupharidine      | C[C@H](CC[C@H]1C2=COC=C2)[C@](N1[C@@H]3O)([H])CC[C@@]43C[C@]5(CS4)CN6[C@H](C7=CO C=C7)CC[C@@H](C)[C@]6([H])CC5                                               |
| 392 | 6,6'-dihydroxythiobinupharidine | C[C@H](CC[C@H]1C2=COC=C2)[C@](N1[C@@H]3O)([H])CC[C@@]43C[C@]5(CS4)[C@@H](O)N6[C@H](C7=CO C=C7)CC[C@@H](C)[C@]6([H])CC5                                       |
| 393 | neothiobinupharidine            | [H][C@]12[C@@H](CC[C@H](N1C[C@]3(C[C@@]([CS3)(CN4[C@@H](CC5)C6=COC=C6)CC[C@]4([C@@H]5C)[H])CC2)C7=COC=C7)C                                                   |

|            |                                  |                                                                                                                                 |
|------------|----------------------------------|---------------------------------------------------------------------------------------------------------------------------------|
| <b>394</b> | neothiobinupharidine β-sulfoxide | <chem>[H][C@]12[C@@H](CC[C@H](N1C[C@]3(C[C@@](C[S@]3=O)(CN4[C@@H](CC5)C6=COC=C6)CC[C@]4([C@@H]5C)[H])CC2)C7=COC=C7)C</chem>     |
| <b>395</b> | thionuplutine B                  | <chem>C[C@H]1[C@@]2([H])N(C[C@](C[C@]34CN5[C@@H](CC[C@H]([C@@]5(CC4)[H])C)C6=COC=C6)(CS3)CC2)[C@H](C7=COC=C7)CC1</chem>         |
| <b>396</b> | thionuplutine B β-sulfoxide      | <chem>C[C@H]1[C@@]2([H])N(C[C@](C[C@]34CN5[C@@H](CC[C@H]([C@@]5(CC4)[H])C)C6=COC=C6)(C[S@]3=O)CC2)[C@H](C7=COC=C7)CC1</chem>    |
| <b>397</b> | 6-hydroxythionuplutine B         | <chem>C[C@H]1[C@@]2([H])N(C[C@](C[C@]34[C@@H](O)N5[C@@H](CC[C@H]([C@@]5(CC4)[H])C)C6=COC=C6)(CS3)CC2)[C@H](C7=COC=C7)CC1</chem> |

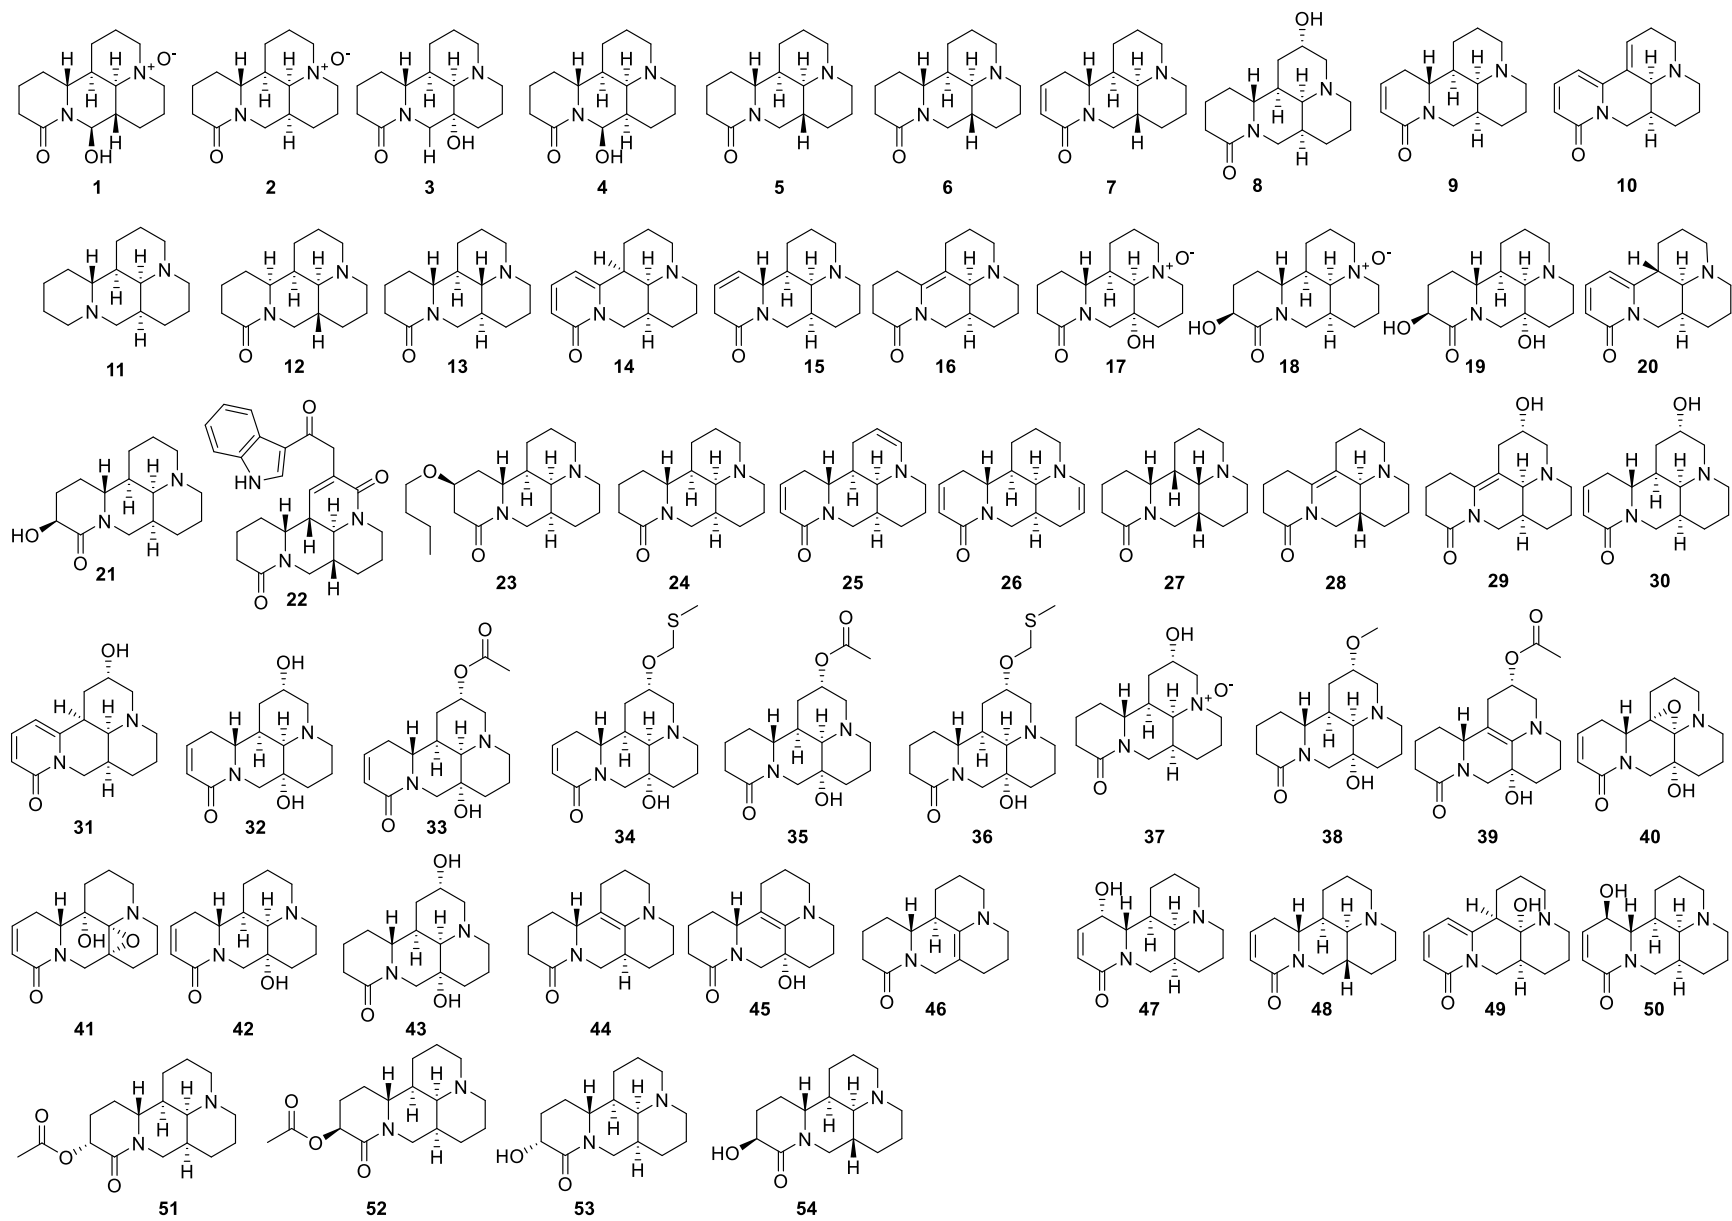

**Figure S1.** Matrine-type quinolizidine alkaloids **1-54**

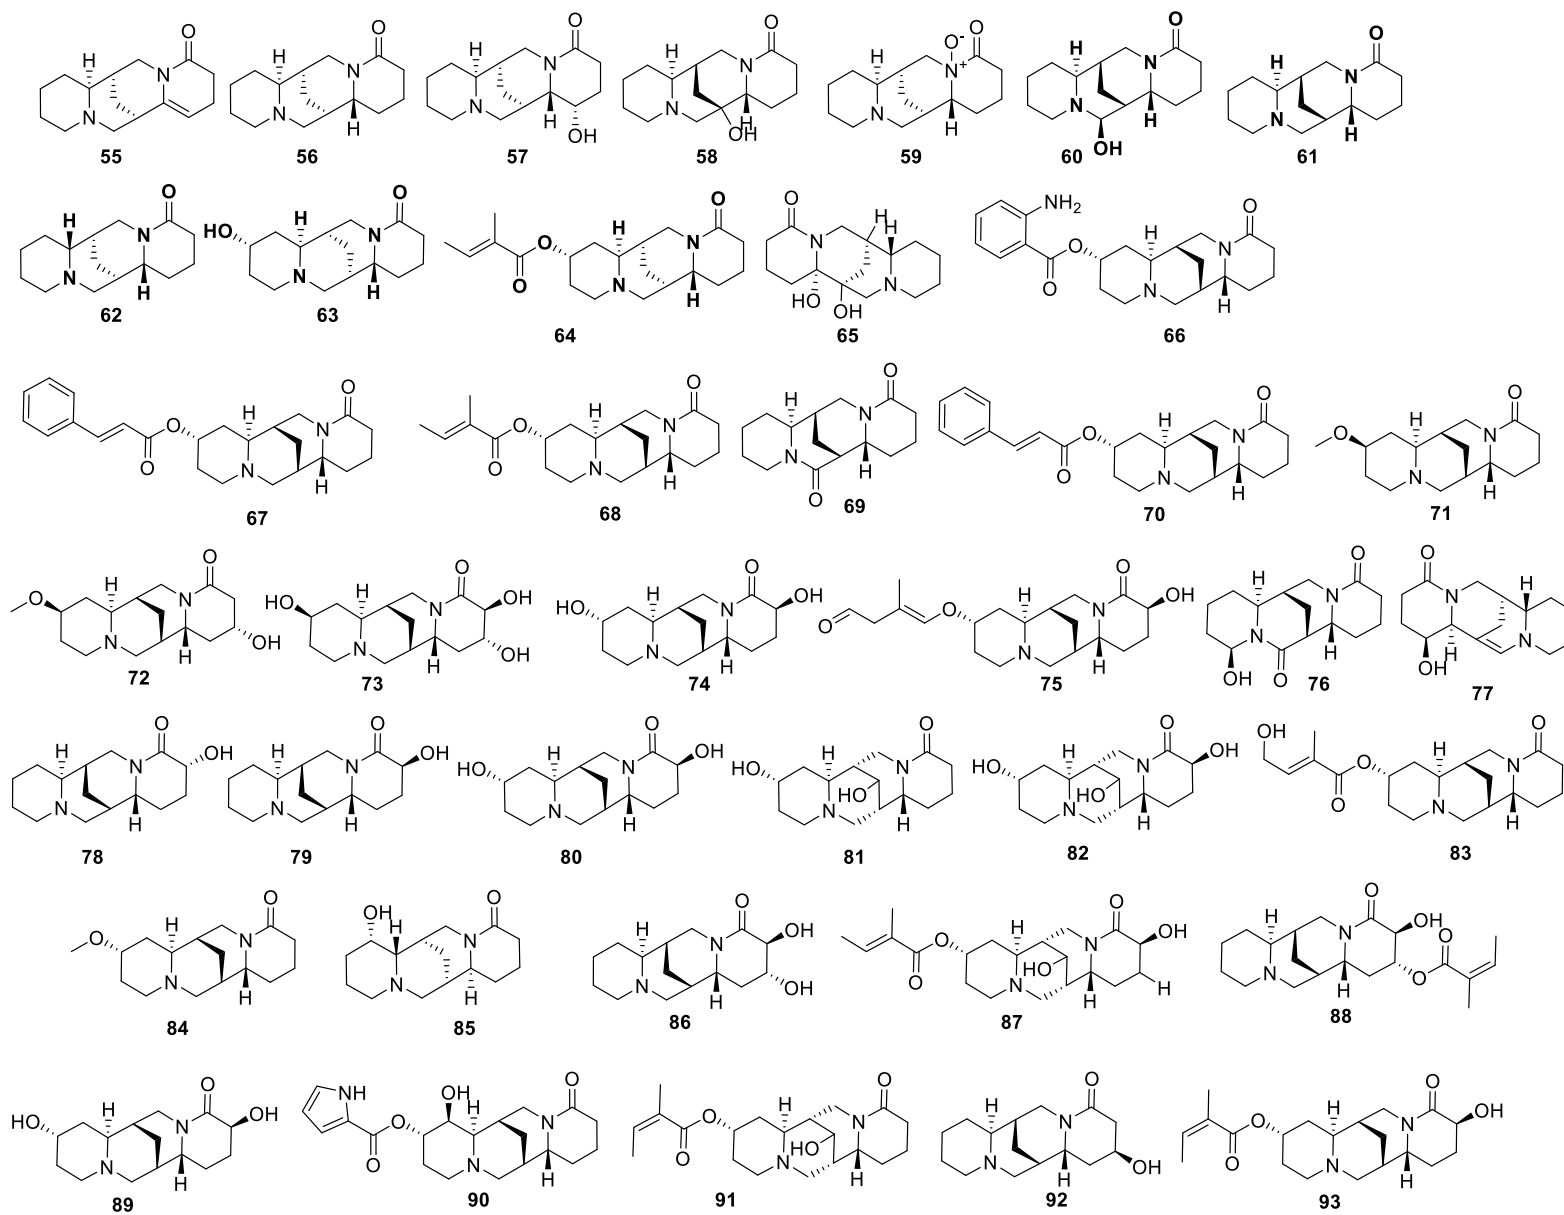

**Figure S2.** Lupanine-type quinolizidine alkaloids 55-93

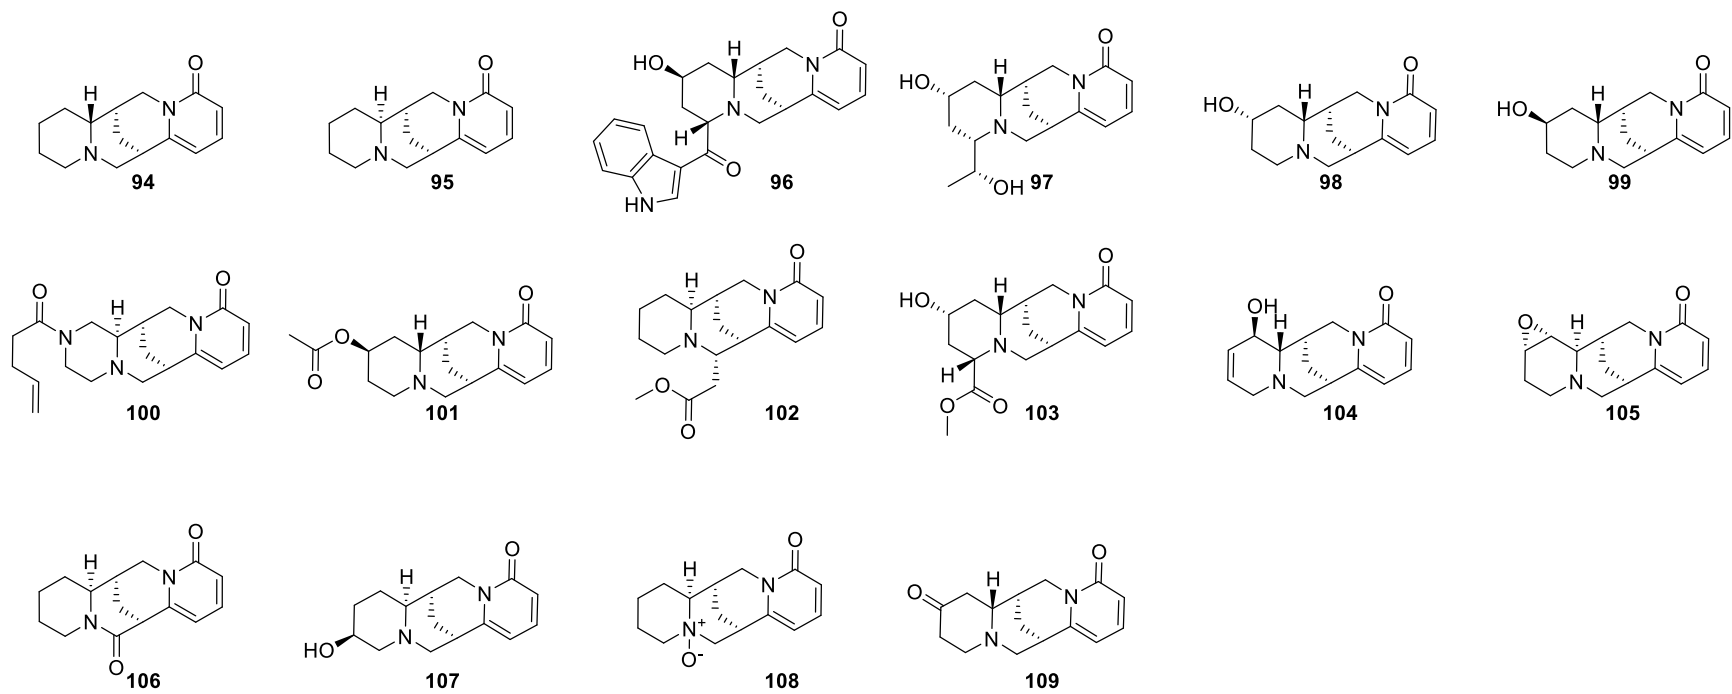

**Figure S3.** Anagrine-type quinolizidine alkaloids **94-109**



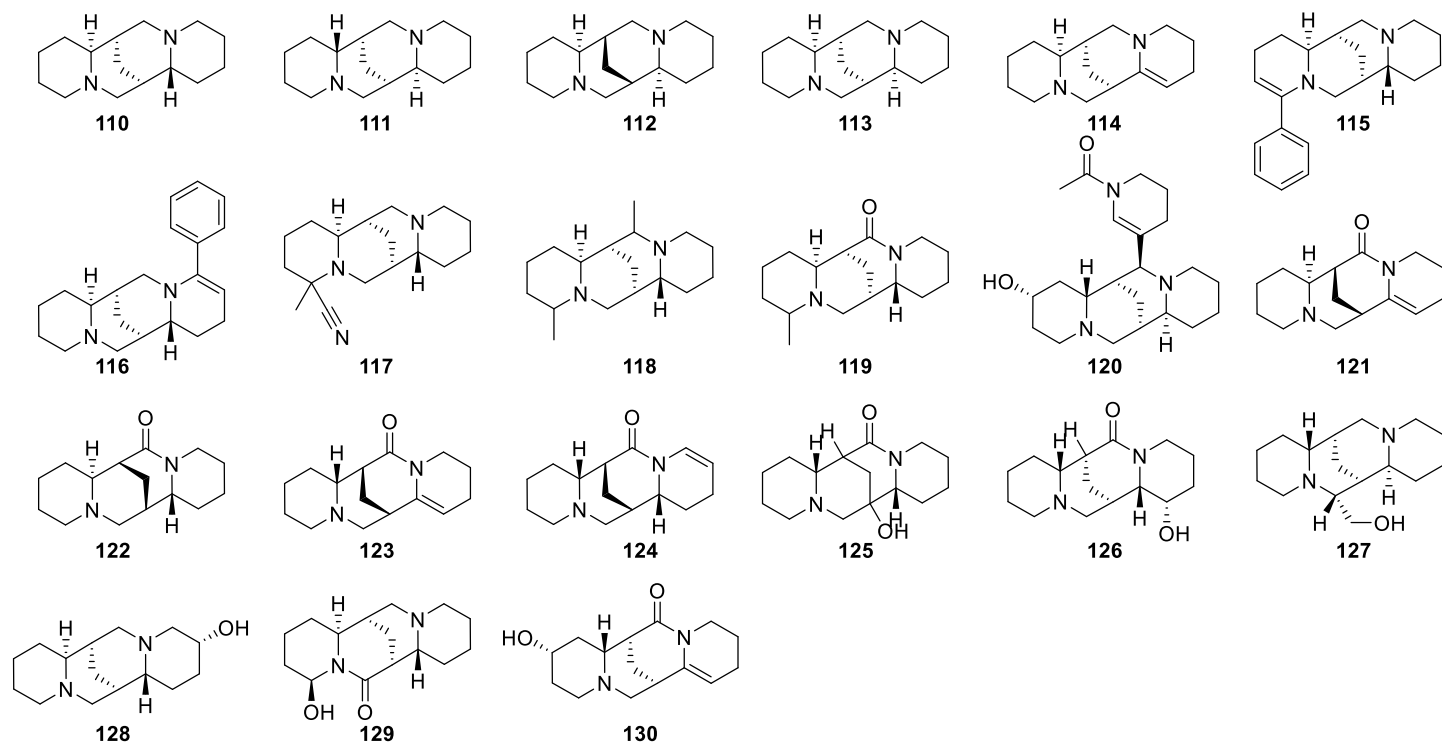

**Figure S4.** Sparteine-type quinolizidine alkaloids **110-130**

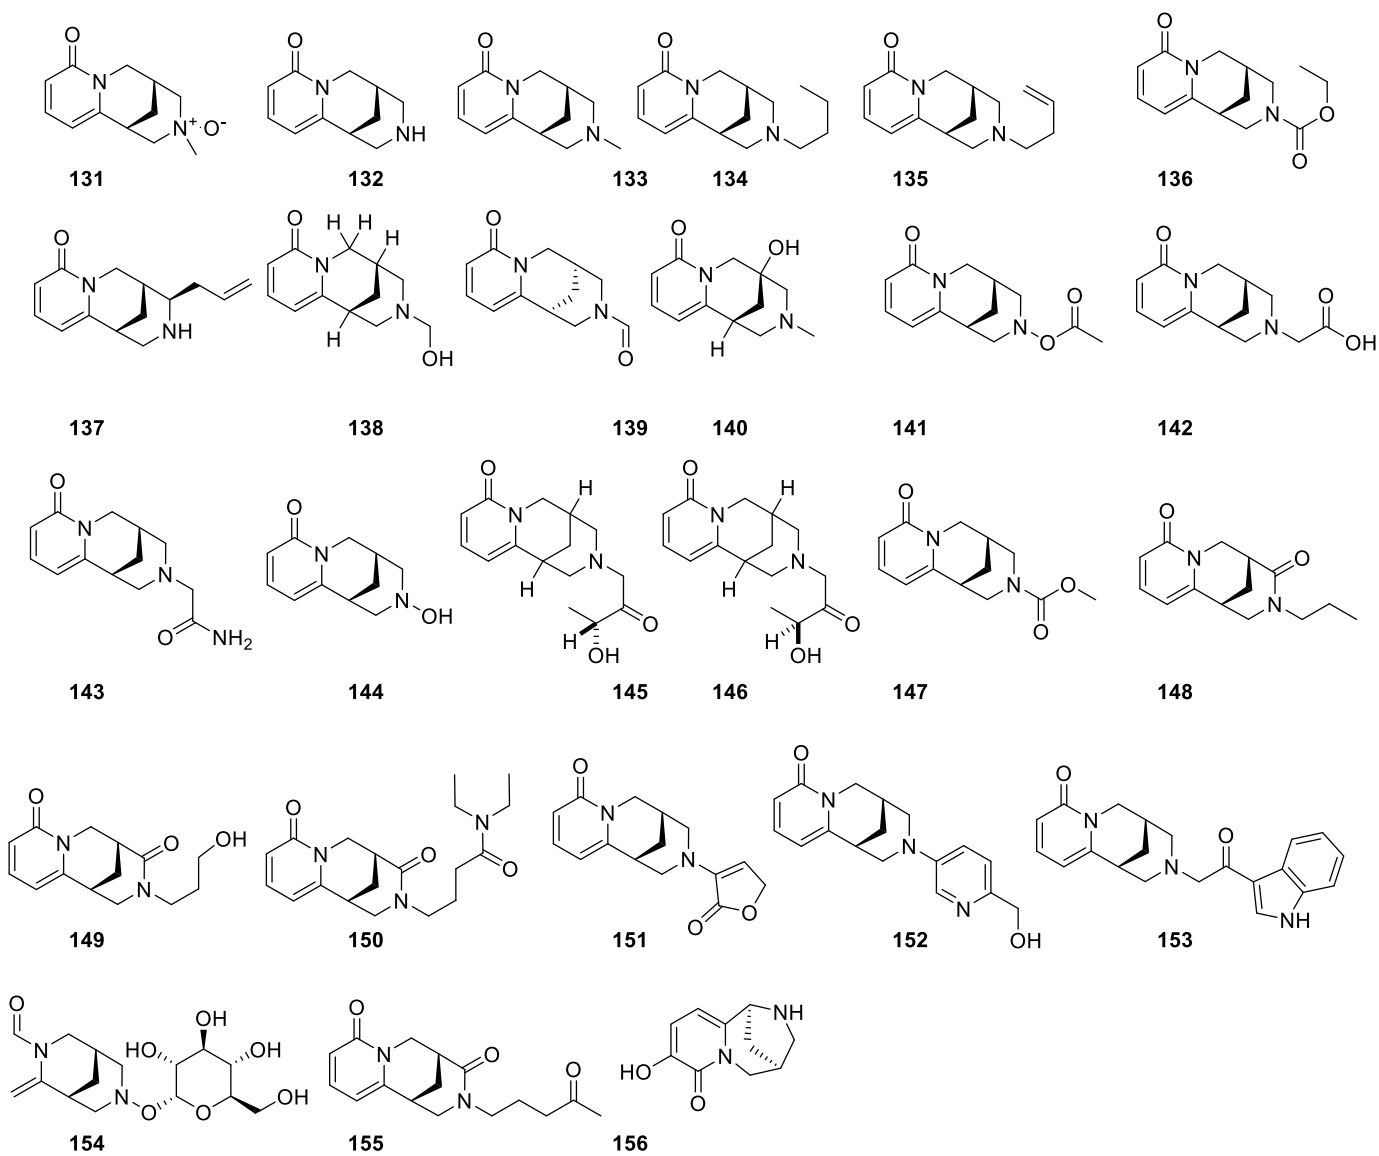

**Figure S5.** Cytisine-type quinolizidine alkaloids **131-156**

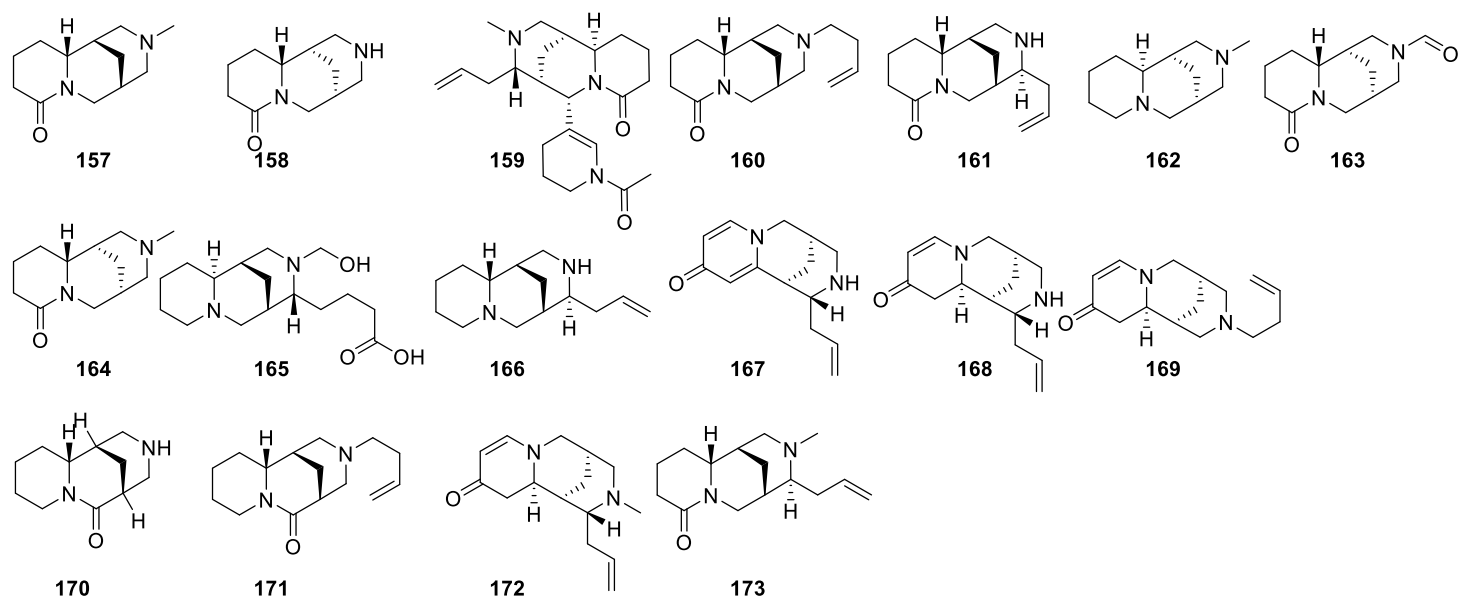

**Figure S6.** Tetrahydrocytisine-type quinolizidine alkaloids **157-173**

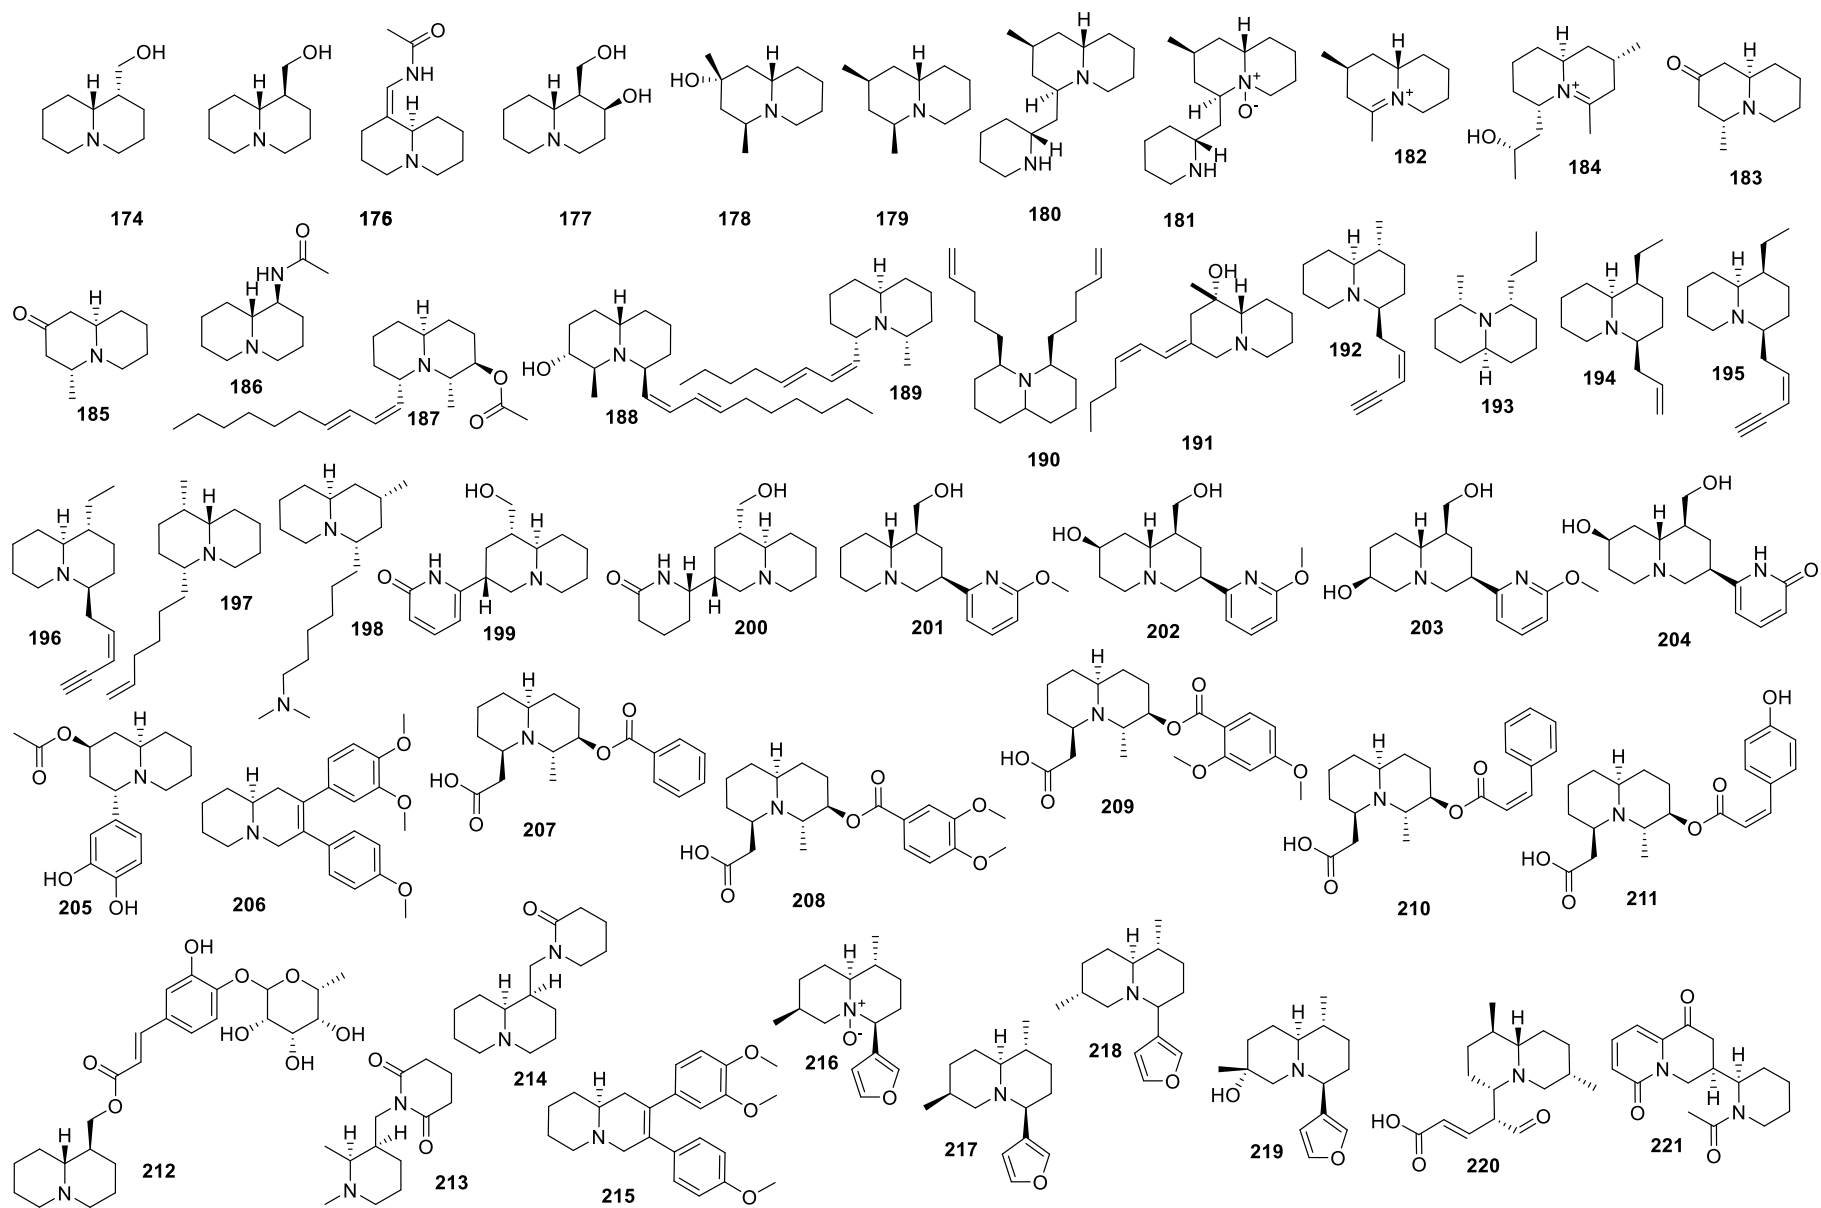

**Figure S7.** Lupinine-type quinolizidine alkaloids 174-221

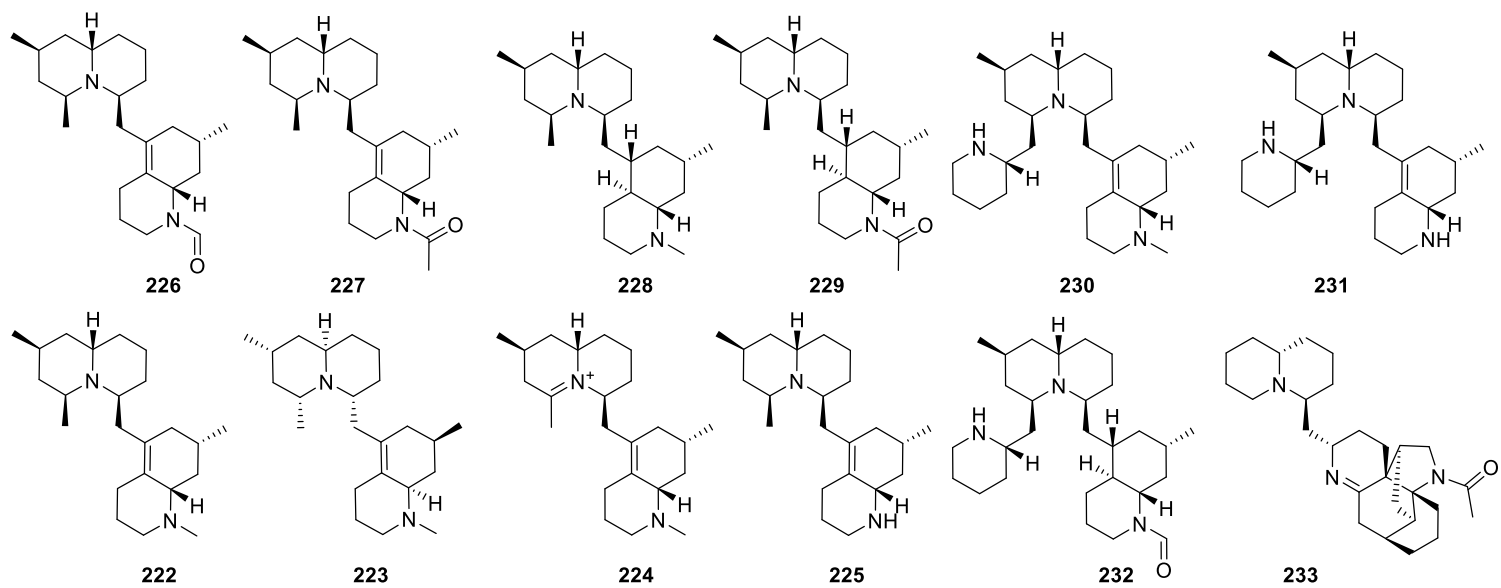

**Figure S8.** Senepodine-type quinolizidine alkaloids **222-233**

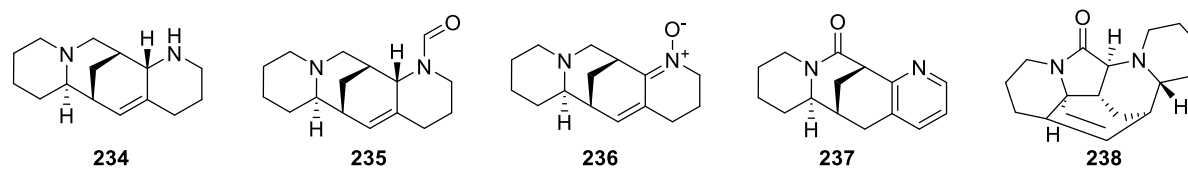

**Figure S9.** Aloperine-type quinolizidine alkaloids **234-238**

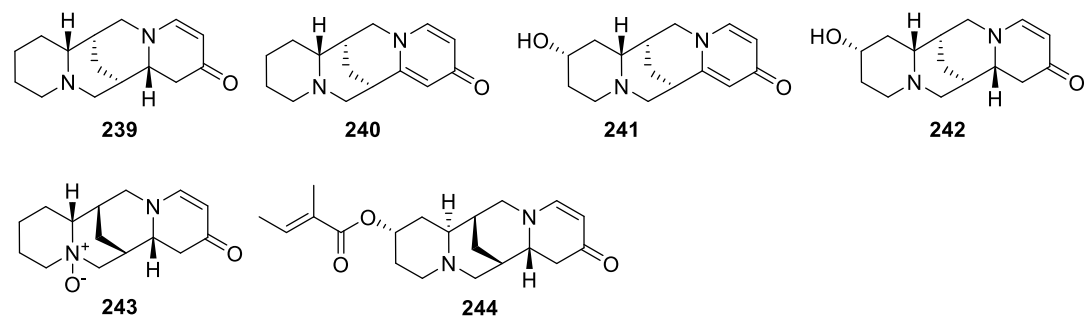

**Figure S10.** Multiflorine-type quinolizidine alkaloids **239-244**

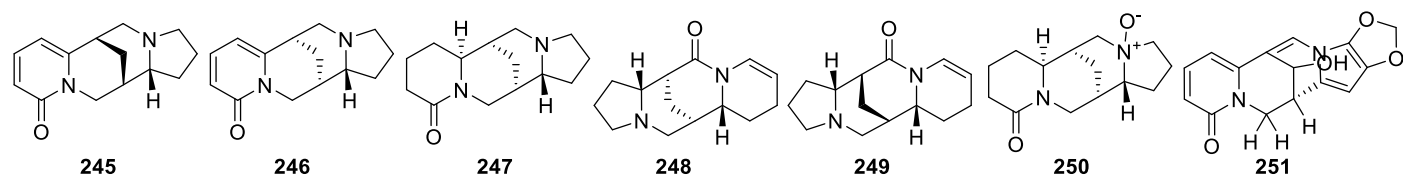

**Figure S11.** Leontidine-type quinolizidine alkaloids **245-250**

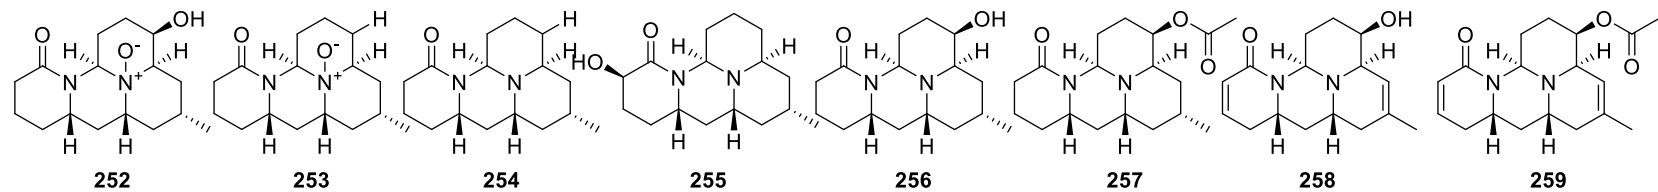

**Figure S12.** Ceruine-type quinolizidine alkaloids **252-259**

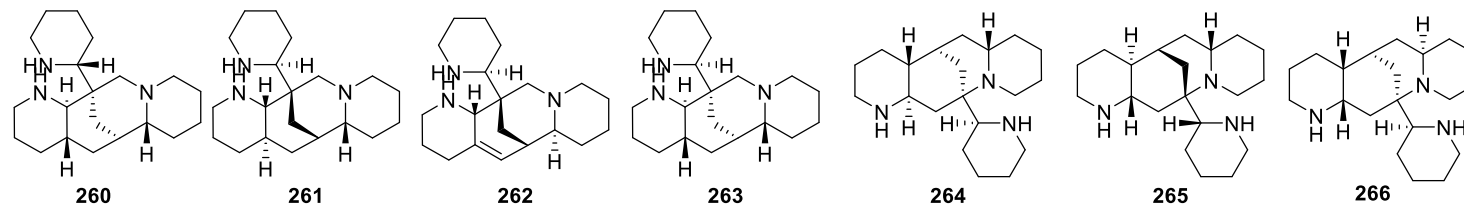

**Figure S13.** Ormosanine-type quinolizidine alkaloids **260-266**

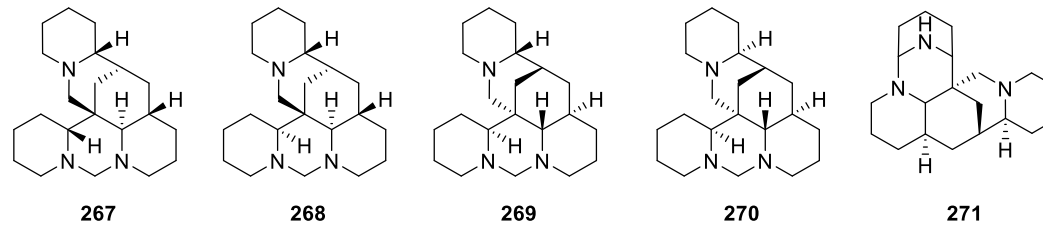

**Figure S14.** Homoormosanine-type quinolizidine alkaloids **267-271**

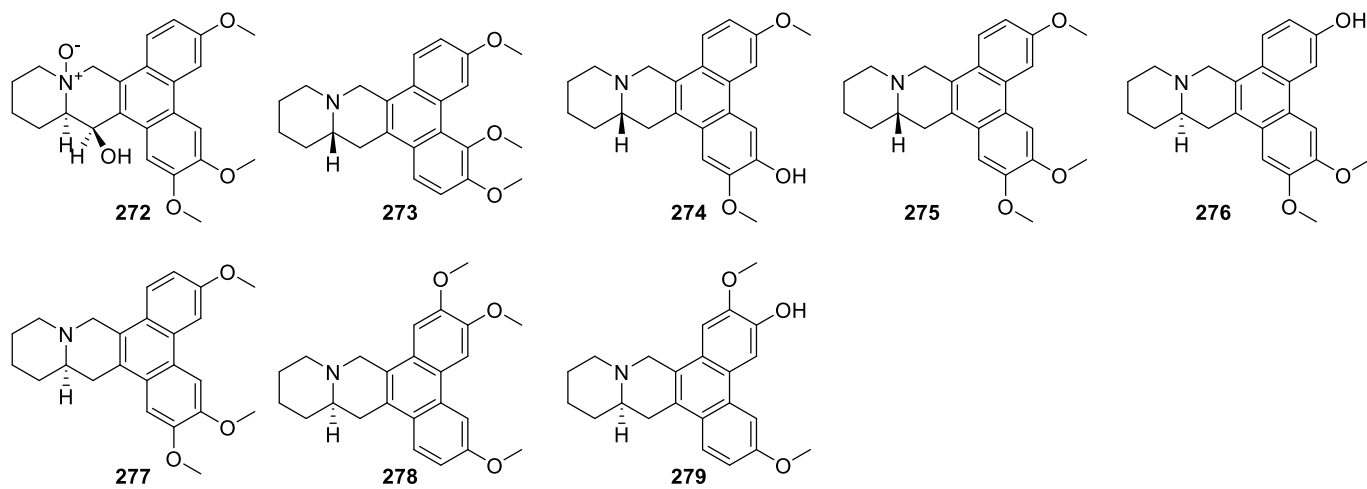

**Figure S15.** Phenanthroquinolizidine-type quinolizidine alkaloids **272-279**

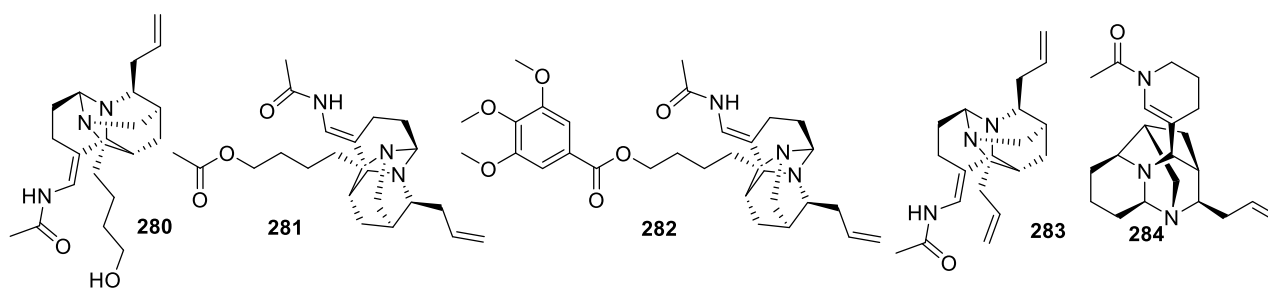

**Figure S16.** Acosmine-type quinolizidine alkaloids **280-284**

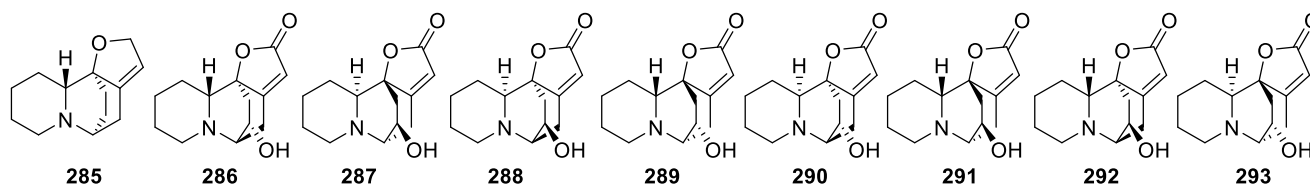

**Figure S17.** Neosecurinan-type quinolizidine alkaloids **285-293**



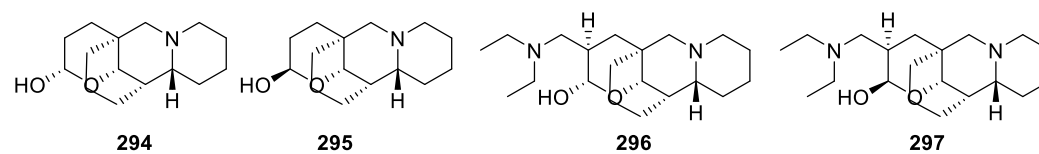

**Figure S18.** Myrifabral-type quinolizidine alkaloids **294-297**

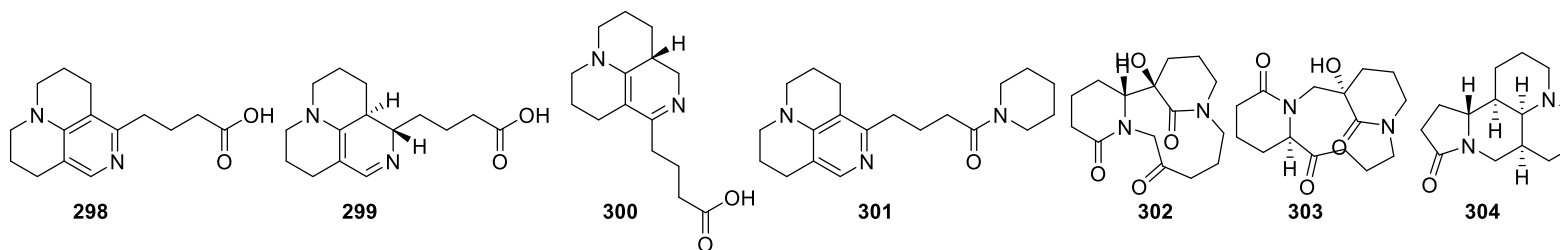

**Figure S19.** Flavesine- and alopecurine-type quinolizidine alkaloids **298-304**

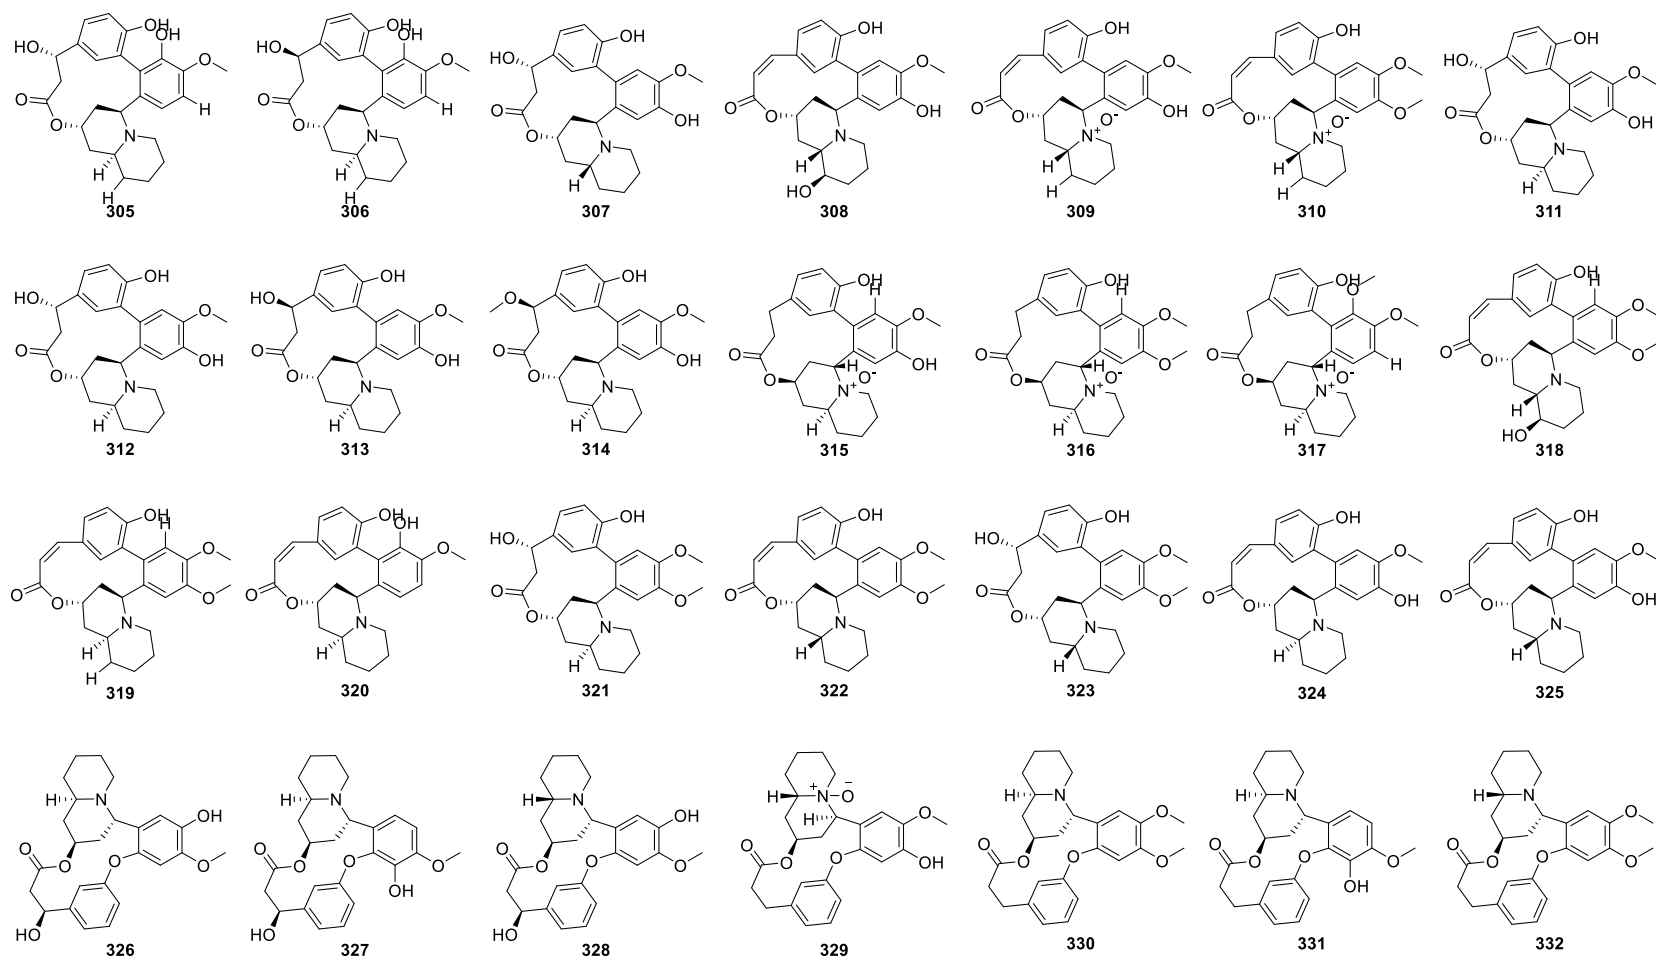

**Figure S20.** Biphenyl and phenyl ether quinolizidine lactones **305-332**

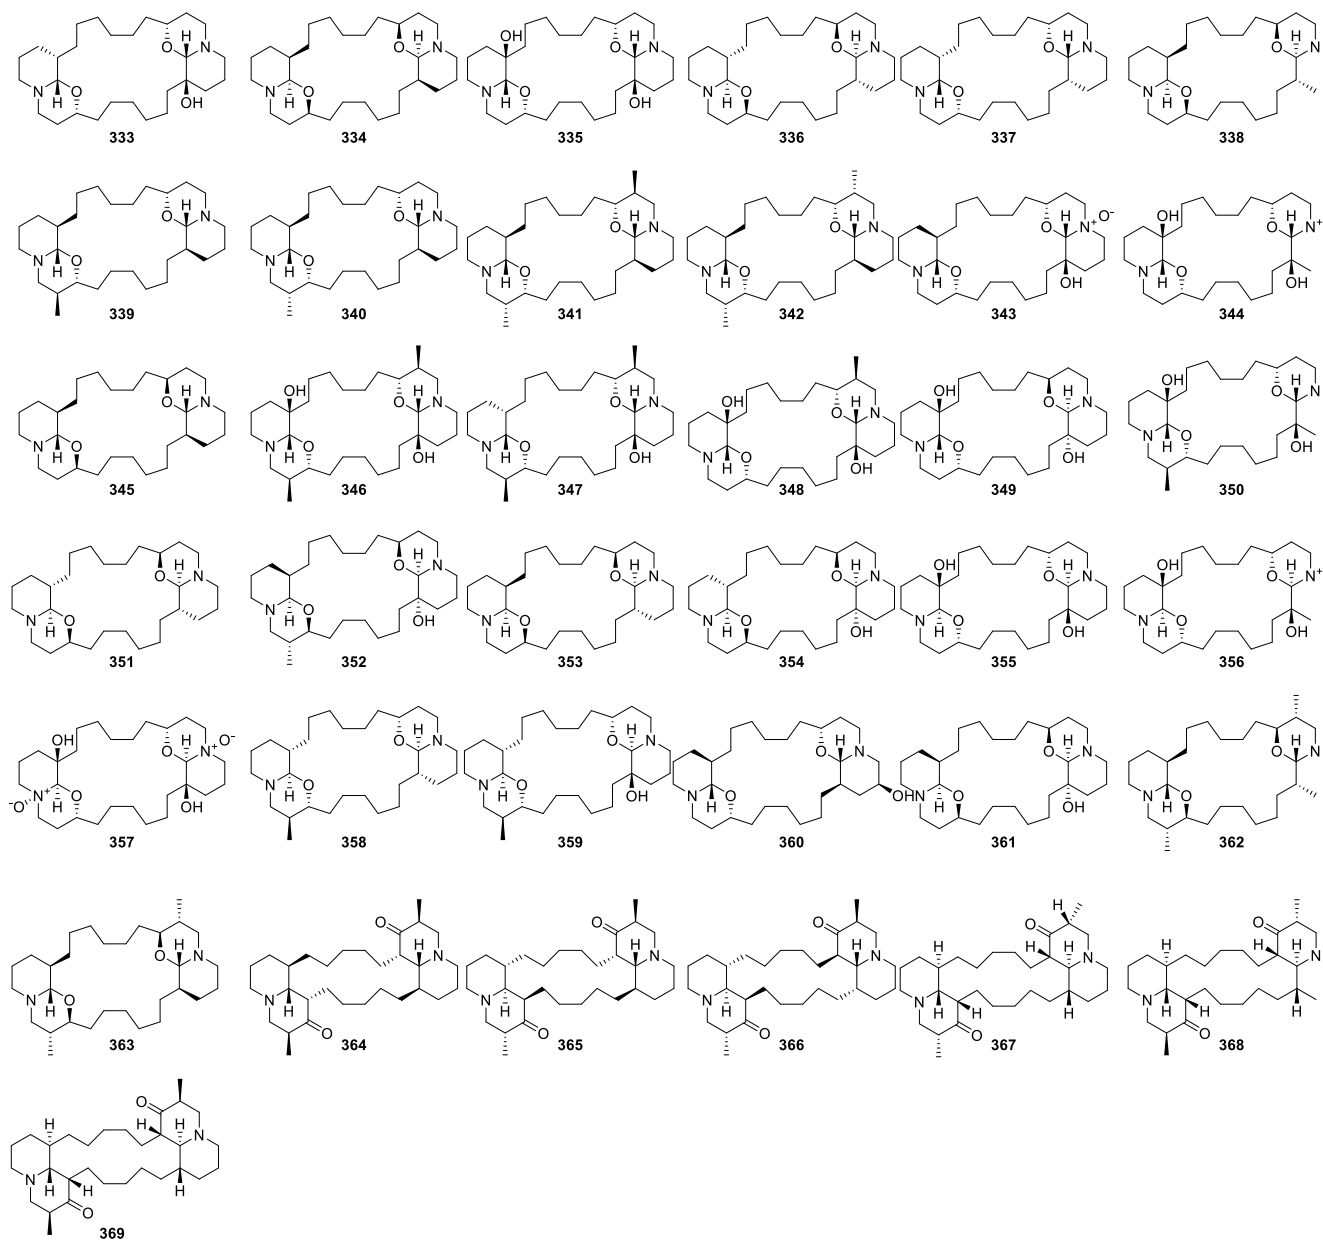

**Figure S21. Macrocyclic *bis*-quinolizidines 333-369**

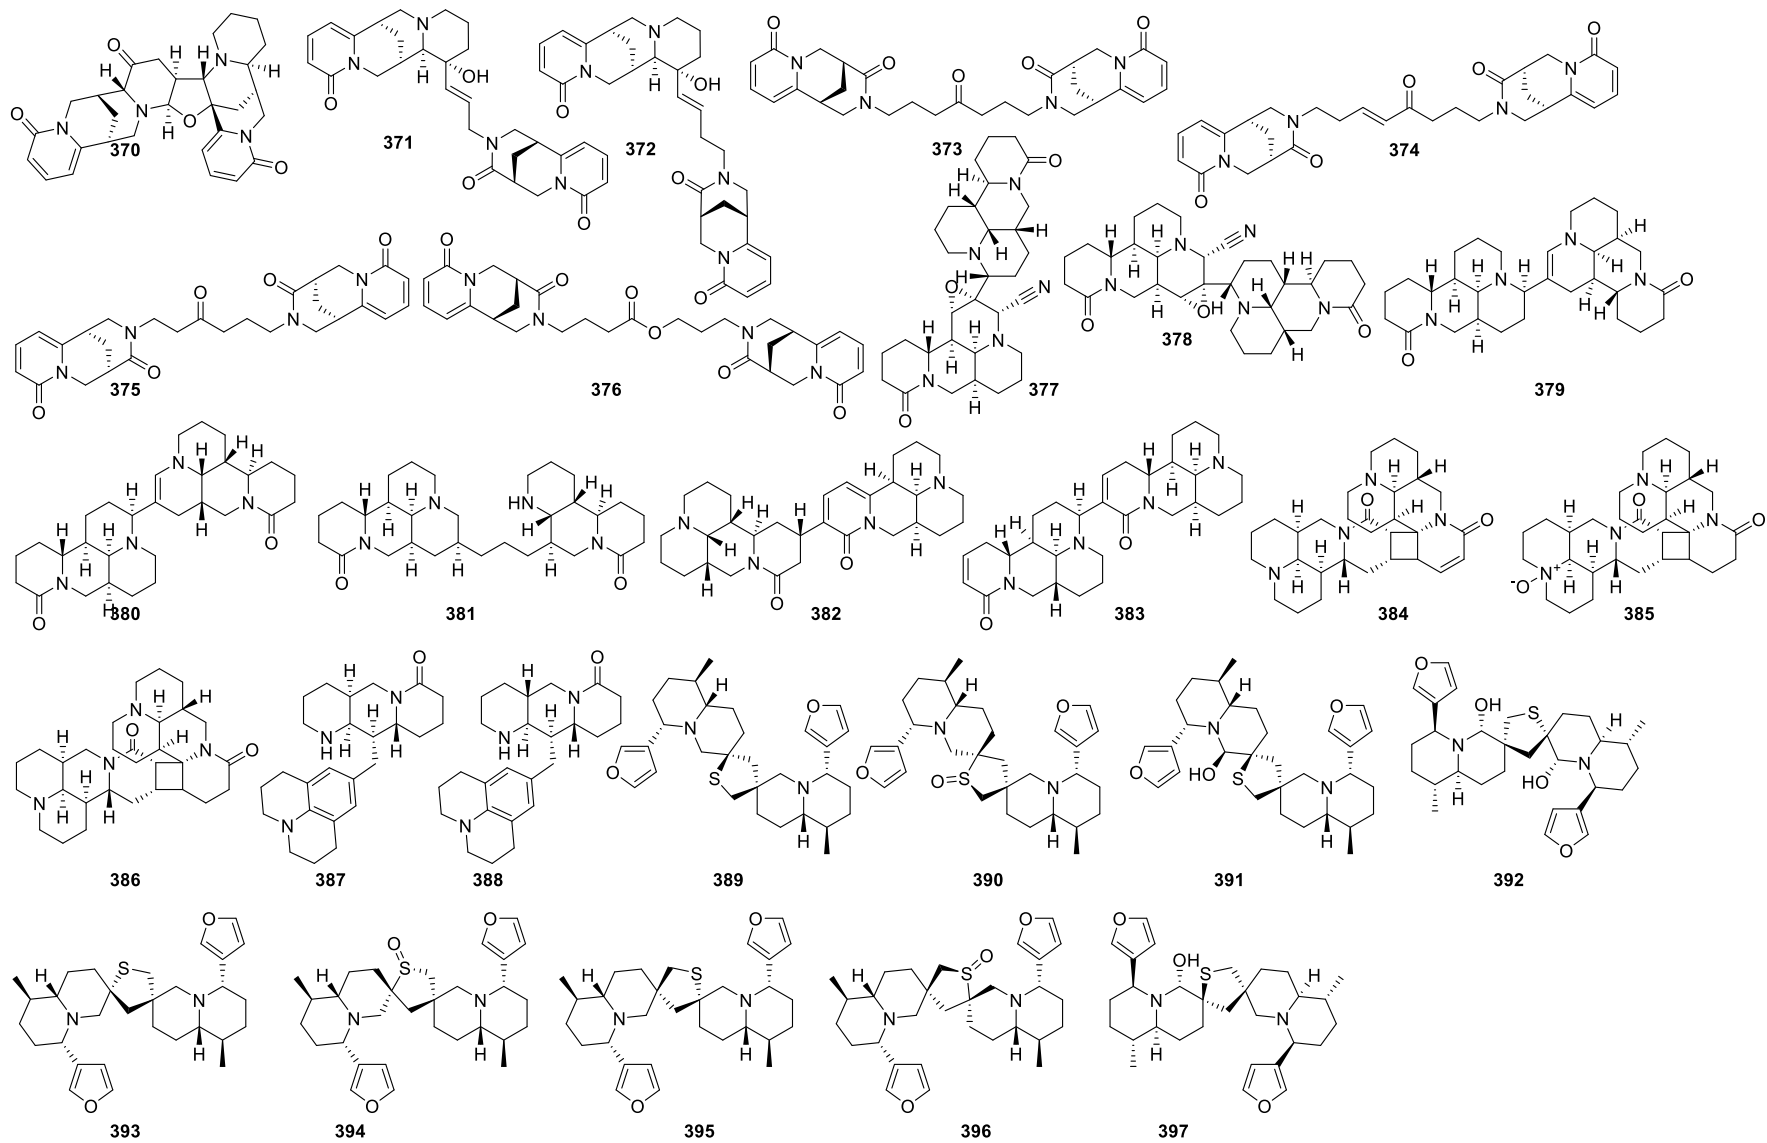

**Figure S22.** Dimeric quinolizidines alkaloids **370-397**

**Table S2.** Compendium of reported biological activity of the 397 quinolizidine alkaloids.

| QA | Activity tested                                                                        | Outcome                                                                                                                                                                                                                                                                                                           | Ref |
|----|----------------------------------------------------------------------------------------|-------------------------------------------------------------------------------------------------------------------------------------------------------------------------------------------------------------------------------------------------------------------------------------------------------------------|-----|
| 1  | Anti-inflammatory effects                                                              | <b>TNF-<math>\alpha</math></b> IC <sub>50</sub> = 35.6 $\pm$ 0.5 $\mu$ mol/L<br>and <b>IL-6</b> IC <sub>50</sub> = 41.7 $\pm$ 0.8 $\mu$ mol/L,                                                                                                                                                                    | 1   |
| 2  | Hepatitis B infection inhibition                                                       | Treatment ( <b>2</b> ) for 3 months (0.6 g/d, i.v., for the first month; 0.2 g, oral, bid for another 2 months) reduced Hsc70 mRNA in liver biopsy samples by 50%                                                                                                                                                 | 2   |
| 3  | Anticonvulsant and Neuroprotective Effects                                             | Percentage SE (%) = 35% and Percentage survival (%)=83.3%                                                                                                                                                                                                                                                         | 3   |
|    | Antiviral Activities against Influenza Virus A/Hanfng/359/95 (H3N2)                    | IC <sub>50</sub> 402.82 $\mu$ M                                                                                                                                                                                                                                                                                   | 4   |
| 4  | Potent anti-HBV activity                                                               | Inhibitory potency against HBsAg secretion of 31.1% and against HBeAg secretion of 26.3%                                                                                                                                                                                                                          | 5   |
|    | Antiviral activity against the Coxsackie virus B3 (CVB3)                               | IC <sub>50</sub> 252.18 $\mu$ M                                                                                                                                                                                                                                                                                   | 4   |
| 5  | Cytotoxicity against human tumor HL-60, SMMC-7721, A-549, MCF-7, and SW-480 cell lines | <b>5</b> showed no cytotoxic activity for five human cancer cell lines.                                                                                                                                                                                                                                           | 6   |
| 6  | Anticancer activity (human pancreatic cancer)                                          | <b>6</b> exhibited remarkable inhibition effects to the growth of human pancreatic, gastric, liver, colon, gallbladder, and prostate carcinoma cells with IC <sub>50</sub> values of about 20 $\mu$ mol/L to 200 $\mu$ mol/L.                                                                                     | 7   |
| 7  | Antiarrhythmic effects                                                                 | LD <sub>50</sub> in mice was 72.1 mg/kg                                                                                                                                                                                                                                                                           | 8   |
|    | Activity anticancer against human lung cancer and hepatoma cells                       | IC <sub>50</sub> for the growth of SMMC-7721 and A549 cells were more than 1.0 mg/mL and less than 0.5 mg/mL, respectively, after the cells were treated with matrine for 72 h.                                                                                                                                   | 9   |
|    | Antiviral Activities against the Hepatitis B Virus                                     | HBsAg secretion = 34.9% (concentration of 0.035 mM)<br>HBeAg secretion = 21.8% (concentration of 0.035 mM)                                                                                                                                                                                                        | 10  |
|    | Anti-inflammatory activity in LPS-Stimulated RAW 264.7 Cells                           | TNF- $\alpha$ (%) = 72.48 $\pm$ 3.83<br>IL-6 (%) = 65.49 $\pm$ 3.64                                                                                                                                                                                                                                               | 11  |
|    | Biopesticide against four pest species of agricultural importance                      | Exposure times (h): 120/ LC <sub>50</sub> and LC <sub>90</sub> (ppm)<br><i>Diaphorina citri</i> : LC <sub>50</sub> =1247 and LC <sub>90</sub> 5712<br><i>Panonychus citri</i> : LC <sub>50</sub> = 42 and LC <sub>90</sub> 73.7<br><i>Sitophilus zeamais</i> : LC <sub>50</sub> = 463.9 and LC <sub>90</sub> 1121 | 12  |

|    |                                                                                                           |                                                                                                                                                                                                                                |    |
|----|-----------------------------------------------------------------------------------------------------------|--------------------------------------------------------------------------------------------------------------------------------------------------------------------------------------------------------------------------------|----|
|    | Inhibition effect on cancer cell proliferation                                                            | <i>Spodoptera frugiperda</i> : LC <sub>50</sub> = 384.3 and LC <sub>90</sub> 1034<br>HepG2: the inhibitory rates were 28±0.42, 14.81±0.81, and 18.25±0.99 %, respectively, for 24, 48, and 72 h at concentration of 1.0 mg/ mL | 13 |
|    | Antiviral Effect against Human Enterovirus 71                                                             | The viral RNA copy number detected by quantitative RT-PCR (qRT-PCR) in the infected RD cells were suppressed in a set of concentrations between 4 and 128 µg/mL                                                                | 14 |
| 8  | Antiviral activity against the Coxsackie virus B3 (CVB3)                                                  | IC <sub>50</sub> 197.22 µM                                                                                                                                                                                                     | 4  |
| 9  | Antiviral Activity: Inhibition of HHV-6 Replication                                                       | IC <sub>50</sub> 3.9 mM                                                                                                                                                                                                        | 15 |
| 10 | No reported activity                                                                                      | Structural elucidation only                                                                                                                                                                                                    | -  |
| 11 | No reported activity                                                                                      | Structural elucidation only                                                                                                                                                                                                    | -  |
| 12 | No reported activity                                                                                      | Structural elucidation only                                                                                                                                                                                                    | -  |
| 13 | Antiviral activity against hepatitis B virus (in HepG 2.2.15 cells)                                       | HBsAg (inhibition %) = 26.3                                                                                                                                                                                                    | 16 |
| 14 | Antiviral Activities against Influenza Virus A/Hanfang/359/95 (H3N2)                                      | IC <sub>50</sub> 63.07 µM                                                                                                                                                                                                      | 4  |
| 15 | antiviral activity against hepatitis B virus (HBV)                                                        | HBsAg (inhibition %)= 52.6<br>HBeAg (inhibition %)= 25.4                                                                                                                                                                       | 17 |
| 16 | No reported activity                                                                                      |                                                                                                                                                                                                                                | -  |
| 17 | Anti-inflammatory effects on RAW264.7 cells                                                               | Cytokine: TNF-α (%) = 73.53 ± 9.35                                                                                                                                                                                             | 18 |
| 18 | Anti-HBV activity                                                                                         | HBsAg secretion of 22.6%<br>HBeAg secretion of 30.4%                                                                                                                                                                           | 5  |
| 19 | No activity                                                                                               | Structural elucidation only                                                                                                                                                                                                    | -  |
| 20 | No activity                                                                                               | Structural elucidation only                                                                                                                                                                                                    | -  |
| 21 | Anti-HBV activity                                                                                         | Inhibitory potency against HBsAg secretion of 22.6% and against HBeAg secretion of 30.4%                                                                                                                                       | 5  |
|    | Antiviral activity against the Coxsackie virus B3 (CVB3)                                                  | IC <sub>50</sub> 184.14 µM                                                                                                                                                                                                     | 4  |
| 22 | Antiviral. Activities against the Hepatitis B Virus                                                       | HBsAg secretion = 53.8% (concentration of 0.035 mM)<br>HBeAg secretion = 39.8% (concentration of 0.035 mM)                                                                                                                     | 10 |
| 23 | cytotoxicity assays against the acute myelogenous leukemia (HL-60) or human lung cancer (A-549) cell line | (IC <sub>50</sub> > 20 µM) (not exhibit significant Activity)                                                                                                                                                                  | 19 |
| 24 | Antiproliferative Activity Assay                                                                          | (IC <sub>50</sub> > 20 µM) (not exhibit significant Activity)                                                                                                                                                                  | 20 |

|    |                                                                                           |                                                                                |    |
|----|-------------------------------------------------------------------------------------------|--------------------------------------------------------------------------------|----|
| 25 | No reported activity                                                                      | Structural elucidation only                                                    | -  |
| 26 | No reported activity                                                                      | Structural elucidation only                                                    | -  |
| 27 | cytotoxicity activity against HL-60, SMMC-7721, A-549, MCF-7, and SW480 cancer cell lines | 27 was not active against the above five human cancer cell lines               | 6  |
| 28 | Antiviral activity against hepatitis B virus (in HepG 2.2.15 cells)                       | HBsAg (inhibition %) = 25.4<br>HBeAg (inhibition%) = 22.6                      | 16 |
| 29 | No reported activity                                                                      | Structural elucidation only                                                    | -  |
| 30 | No reported activity                                                                      | Structural elucidation only                                                    | -  |
| 31 | No reported activity                                                                      | Structural elucidation only                                                    | -  |
| 32 | Significant anti-TMV biological activity (in <i>N. glutinosa</i> )                        | Average inhibition rate (%): Protective effect: 64.2%; Curative effect: 68.4%  | 21 |
| 33 | Significant anti-TMV biological activity (in <i>N. glutinosa</i> )                        | Average inhibition rate (%): Protective effect: 62.7%; Curative effect: 59.4%  | 21 |
| 34 | Significant anti-TMV biological activity (in <i>N. glutinosa</i> )                        | Average inhibition rate (%): Protective effect: 81.2%; Curative effect: 78.3%  | 21 |
| 35 | Significant anti-TMV biological activity (in <i>N. glutinosa</i> )                        | Average inhibition rate (%): Protective effect: 64.3%; Curative effect: 65.2%  | 21 |
| 36 | Significant anti-TMV biological activity (in <i>N. glutinosa</i> )                        | Average inhibition rate (%): Protective effect: 78.8%; Curative effect: 33.9%  | 21 |
| 37 | Significant anti-TMV biological activity (in <i>N. glutinosa</i> )                        | Average inhibition rate (%): Protective effect: 52.6%; Curative effect: 55%    | 21 |
|    | Insecticidal Activity against <i>A. fabae</i>                                             | LC <sub>50</sub> = 38.29 $\mu$ M                                               | 21 |
| 38 | Significant anti-TMV biological activity (in <i>N. glutinosa</i> )                        | Average inhibition rate (%): Protective effect: 64.3%; Curative effect: 44.1%  | 21 |
| 39 | Significant anti-TMV biological activity (in <i>N. glutinosa</i> )                        | Average inhibition rate (%): Protective effect: 61.9%; Curative effect: 58.2%  | 21 |
| 40 | Significant anti-TMV biological activity (in <i>N. glutinosa</i> )                        | Average inhibition rate (%): Protective effect: 66.0%; Curative effect: 52.4%  | 21 |
| 41 | Significant anti-TMV biological activity (in <i>N. glutinosa</i> )                        | Average inhibition rate (%): Protective effect: 69.2%; Curative effect: 60.5%  | 21 |
| 42 | Antiviral Activities against Influenza Virus A/Hanfang/359/95 (H3N2)                      | IC <sub>50</sub> 440.14 $\mu$ M                                                | 4  |
| 43 | Antiviral Activity: Inhibition Effect of 43 on TMV in <i>N. glutinosa</i>                 | Average inhibition rate (%): Protective effect: 64.1%; Curative effect: 35.0 % | 21 |
| 44 | Antiviral Activity: Inhibition Effect of 43 on TMV in <i>N. glutinosa</i>                 | Average inhibition rate (%): Protective effect: 53.4%; Curative effect: 32.4 % | 21 |

|    |                                                                                                                                                                                                             |                                                                                           |    |
|----|-------------------------------------------------------------------------------------------------------------------------------------------------------------------------------------------------------------|-------------------------------------------------------------------------------------------|----|
| 45 | Antiviral Activity: Inhibition Effect of 43 on TMV in <i>N. glutinosa</i>                                                                                                                                   | Average inhibition rate (%): Protective effect: 51.7%; Curative effect: 21.2 %            | 21 |
| 46 | Antiviral Activity: Inhibition Effect of 43 on TMV in <i>N. glutinosa</i>                                                                                                                                   | Average inhibition rate (%): Protective effect: 61.3%; Curative effect: 42.2 %            | 21 |
| 47 | Antiviral Activities against Influenza Virus A/Hanfang/359/95 (H3N2)                                                                                                                                        | IC <sub>50</sub> 84.70 μM                                                                 | 4  |
| 48 | Activity against hepatitis B virus (HBV). Secretion in HepG2 2.2.15 cell line                                                                                                                               | HBsAg (inhibition %) = 79.3 (0.8 (μmol/mL)<br>HBeAg (inhibition%) = 27.6 (0.8 (μmol/mL)   | 17 |
| 49 | No reported activity                                                                                                                                                                                        | Structural elucidation only                                                               | -  |
| 50 | Antiviral Activities against Influenza Virus A/Hanfang/359/95 (H3N2)                                                                                                                                        | IC <sub>50</sub> 242.46 μM                                                                | 4  |
| 51 | No reported activity                                                                                                                                                                                        | Structural elucidation only                                                               | -  |
| 52 | No reported activity                                                                                                                                                                                        | Structural elucidation only                                                               | -  |
| 53 | No reported activity                                                                                                                                                                                        | Structural elucidation only                                                               | -  |
| 54 | No reported activity                                                                                                                                                                                        | Structural elucidation only                                                               | -  |
| 55 | cytotoxicity effects against five human tumor cell lines                                                                                                                                                    | IC <sub>50</sub> >100 μM                                                                  | 22 |
| 56 | cytotoxic activities against three human glioma stem cells (GSC-3#, GSC-12# and GSC-18#)                                                                                                                    | Compound 56 was found to inhibit the growth of human glioma stem cells GSC-3# at 20 μg/mL | 23 |
|    | Antifungal activity against <i>Fusarium oxysporum</i>                                                                                                                                                       | IC <sub>50</sub> >100 μM                                                                  | 24 |
| 57 | Antibacterial activity                                                                                                                                                                                      | <i>S. aureus</i> MIC ± SD = 32 ± 2.4 μg/mL<br><i>E. coli</i> MIC ± SD = 32 ± 1.9 μg/mL    | 25 |
| 58 | Antibacterial activity                                                                                                                                                                                      | <i>S. aureus</i> MIC ± SD = 16 ± 0.9 μg/mL<br><i>E. coli</i> MIC ± SD = 32 ± 1.5 μg/mL    | 25 |
| 59 | Antibacterial activity                                                                                                                                                                                      | <i>S. aureus</i> MIC ± SD = 64 ± 3.8 μg/mL<br><i>E. coli</i> MIC ± SD = > 128 μg/mL       | 25 |
| 60 | No reported activity                                                                                                                                                                                        | Structural elucidation only                                                               | -  |
| 61 | No reported activity                                                                                                                                                                                        | Structural elucidation only                                                               | -  |
| 62 | No reported activity                                                                                                                                                                                        | Structural elucidation only                                                               | -  |
| 63 | Antifungal activity against <i>Fusarium oxysporum</i>                                                                                                                                                       | IC <sub>50</sub> 78.45 μM                                                                 | 24 |
| 64 | No reported activity                                                                                                                                                                                        | Structural elucidation only                                                               | -  |
| 65 | Antibacterial activity against <i>E. faecalis</i>                                                                                                                                                           | MIC ± SD = 208.33 μg/mL                                                                   | 26 |
| 66 | Antimicrobial activity ( <i>S.aureus</i> , <i>S. epidermides</i> , <i>S. saprophyticum</i> and <i>S. pyogenes</i> ); three Gram-negative bacteria: <i>E. coli</i> , <i>K. pneumonia</i> and <i>S. sonei</i> | MIC = 25.0-50.0 μg/mL against all bacteria tested.                                        | 27 |



|    |                                                                                                                                                                                                             |                                                                    |    |
|----|-------------------------------------------------------------------------------------------------------------------------------------------------------------------------------------------------------------|--------------------------------------------------------------------|----|
| 67 | Antimicrobial activity ( <i>S.aureus</i> , <i>S. epidermides</i> , <i>S. saprophyticum</i> and <i>S. pyogenes</i> ); three Gram-negative bacteria: <i>E. coli</i> , <i>K. pneumonia</i> and <i>S. sonei</i> | MIC = >100 µg /mL against all bacteria tested.                     | 27 |
| 68 | No reported activity                                                                                                                                                                                        | Structural elucidation only                                        | -  |
| 69 | No reported activity                                                                                                                                                                                        | Structural elucidation only                                        | -  |
| 70 | No reported activity                                                                                                                                                                                        | Structural elucidation only                                        | -  |
| 71 | No reported activity                                                                                                                                                                                        | Structural elucidation only                                        | -  |
| 72 | No reported activity                                                                                                                                                                                        | Structural elucidation only                                        | -  |
| 73 | No reported activity                                                                                                                                                                                        | Structural elucidation only                                        | -  |
| 74 | No reported activity                                                                                                                                                                                        | Structural elucidation only                                        | -  |
| 75 | No reported activity                                                                                                                                                                                        | Structural elucidation only                                        | -  |
| 76 | No reported activity                                                                                                                                                                                        | Structural elucidation only                                        | -  |
| 77 | No reported activity                                                                                                                                                                                        | Structural elucidation only                                        | -  |
| 78 | No reported activity                                                                                                                                                                                        | Structural elucidation only                                        | -  |
| 79 | No reported activity                                                                                                                                                                                        | Structural elucidation only                                        | -  |
| 80 | No reported activity                                                                                                                                                                                        | Structural elucidation only                                        | -  |
| 81 | No reported activity                                                                                                                                                                                        | Structural elucidation only                                        | -  |
| 82 | No reported activity                                                                                                                                                                                        | Structural elucidation only                                        | -  |
| 83 | No reported activity                                                                                                                                                                                        | Structural elucidation only                                        | -  |
| 84 | No reported activity                                                                                                                                                                                        | Structural elucidation only                                        | -  |
| 85 | No reported activity                                                                                                                                                                                        | Structural elucidation only                                        | -  |
| 86 | No reported activity                                                                                                                                                                                        | Structural elucidation only                                        | -  |
| 87 | No reported activity                                                                                                                                                                                        | Structural elucidation only                                        | -  |
| 88 | No reported activity                                                                                                                                                                                        | Structural elucidation only                                        | -  |
| 89 | No reported activity                                                                                                                                                                                        | Structural elucidation only                                        | -  |
| 90 | No reported activity                                                                                                                                                                                        | Structural elucidation only                                        | -  |
| 91 | No reported activity                                                                                                                                                                                        | Structural elucidation only                                        | -  |
| 92 | Antifungal activity against <i>Fusarium oxysporum</i>                                                                                                                                                       | IC <sub>50</sub> 36.63 µM                                          | 24 |
| 93 | No reported activity                                                                                                                                                                                        | Structural elucidation only                                        | -  |
| 94 | Anti-inflammatory effects on RAW264.7 cells                                                                                                                                                                 | Cytokine: TNF-α (%) = 46.96 ± 0.04; Cytokine: IL-6(%):41.76 ± 1.74 | 18 |
|    | Antifungal activity against <i>Fusarium oxysporum</i>                                                                                                                                                       | IC <sub>50</sub> 27.68 µM                                          | 24 |
|    | Insecticide activity against <i>C. pipiens</i>                                                                                                                                                              | LC <sub>50</sub> (ppm)= 3.42; LC <sub>90</sub> (ppm)= 43.83        | 28 |
|    | Cytotoxicity activity                                                                                                                                                                                       | IC <sub>50</sub> MCF-7= 27.3 ± 0.7; HEPG-2= 30.2 ± 1.9             | 28 |

|     |                                                                                                |                                                                                                                                              |    |
|-----|------------------------------------------------------------------------------------------------|----------------------------------------------------------------------------------------------------------------------------------------------|----|
| 95  | Antibacterial activity against <i>E. faecalis</i>                                              | MIC $\pm$ SD = 125.0 $\mu$ g/mL                                                                                                              | 26 |
| 96  | Antiviral<br>Activities against the Hepatitis B Virus                                          | HBsAg secretion = 39.5% (concentration of 0.035 mM)<br>HBeAg secretion = 13.8% (concentration of 0.035 mM)                                   | 10 |
| 97  | No reported activity                                                                           | Structural elucidation only                                                                                                                  | -  |
| 98  | No reported activity                                                                           | Structural elucidation only                                                                                                                  | -  |
| 99  | No reported activity                                                                           | Structural elucidation only                                                                                                                  | -  |
| 100 | No reported activity                                                                           | Structural elucidation only                                                                                                                  | -  |
| 101 | No reported activity                                                                           | Structural elucidation only                                                                                                                  | -  |
| 102 | Insecticidal Activity against <i>A. fabae</i> , <i>N. lugens</i> (Stal), and <i>T. urticae</i> | Average inhibition rate (%): <i>A. fabae</i> : 53.2 $\pm$ 2.6; <i>N. lugens</i> (Stal): 64.7 $\pm$ 11.8; <i>T. urticae</i> : 59.3 $\pm$ 2.5  | 29 |
| 103 | Insecticidal Activity against <i>T. urticae</i>                                                | LC <sub>50</sub> (mg/L)= 65.09                                                                                                               | 29 |
| 104 | Insecticidal Activity against <i>T. urticae</i>                                                | LC <sub>50</sub> (mg/L)= 49.41                                                                                                               | 29 |
| 105 | Insecticidal Activity against <i>A. fabae</i> , <i>N. lugens</i> (Stal), and <i>T. urticae</i> | Average inhibition rate (%): <i>A. fabae</i> : 35.7 $\pm$ 1.8; <i>N. lugens</i> (Stal): 56.8 $\pm$ 4.1; <i>T. urticae</i> : 45.9 $\pm$ 3.0   | 29 |
| 106 | Insecticidal Activity against <i>A. fabae</i> , <i>N. lugens</i> (Stal), and <i>T. urticae</i> | Average inhibition rate (%): <i>A. fabae</i> : 46.9 $\pm$ 1.4; <i>N. lugens</i> (Stal): 56.7 $\pm$ 1.2; <i>T. urticae</i> : 28.7 $\pm$ 2.4   | 29 |
| 107 | Insecticidal Activity against <i>A. fabae</i> , <i>N. lugens</i> (Stal), and <i>T. urticae</i> | Average inhibition rate (%): <i>A. fabae</i> : 27.5 $\pm$ 1.6; <i>N. lugens</i> (Stal): 46.9 $\pm$ 1.4; <i>T. urticae</i> : 38.0 $\pm$ 5.3   | 29 |
| 108 | Insecticidal Activity against <i>A. fabae</i> , <i>N. lugens</i> (Stal), and <i>T. urticae</i> | Average inhibition rate (%): <i>A. fabae</i> : 33.9 $\pm$ 1.1; <i>N. lugens</i> (Stal): 52.1 $\pm$ 4.0; <i>T. urticae</i> : 41.3 $\pm$ 2.3   | 29 |
| 109 | Insecticidal Activity against <i>A. fabae</i> , <i>N. lugens</i> (Stal), and <i>T. urticae</i> | Average inhibition rate (%): <i>A. fabae</i> : 60.3 $\pm$ 3.1; <i>N. lugens</i> (Stal): 46.2 $\pm$ 2.3; <i>T. urticae</i> : 45.0 $\pm$ 4.2   | 29 |
| 110 | Antifungal activity against <i>Fusarium oxysporum</i>                                          | IC <sub>50</sub> 16.53 $\mu$ M                                                                                                               | 24 |
|     | <i>In vitro</i> Anticholinesterase Activity                                                    | Inhibition (%) at 1 mg/mL: AChE: 41.6 $\pm$ 1.62; BChE: 73.9 $\pm$ 1.03                                                                      | 30 |
| 111 | Hyperexcitability, acetylcholine, and GABA release                                             | <b>111</b> has a higher affinity for muscarinic than nicotinic acetylcholine receptors (IC <sub>50</sub> s 21 vs. 331 $\mu$ M, respectively) | 31 |
| 112 | No reported activity                                                                           | Structural elucidation only                                                                                                                  | -  |
| 113 | No reported activity                                                                           | Structural elucidation only                                                                                                                  | -  |
| 114 | No reported activity                                                                           | Structural elucidation only                                                                                                                  | -  |
| 115 | No reported activity                                                                           | Structural elucidation only                                                                                                                  | -  |
| 116 | No reported activity                                                                           | Structural elucidation only                                                                                                                  | -  |
| 117 | No reported activity                                                                           | Structural elucidation only                                                                                                                  | -  |

|     |                                                                          |                                                                                             |    |
|-----|--------------------------------------------------------------------------|---------------------------------------------------------------------------------------------|----|
| 118 | No reported activity                                                     | Structural elucidation only                                                                 | -  |
| 119 | No reported activity                                                     | Structural elucidation only                                                                 | -  |
| 120 | No reported activity                                                     | Structural elucidation only                                                                 | -  |
| 121 | No reported activity                                                     | Structural elucidation only                                                                 | -  |
| 122 | Antifungal activity against <i>Fusarium oxysporum</i>                    | IC <sub>50</sub> 7.24 µM                                                                    | 24 |
| 123 | No reported activity                                                     | Structural elucidation only                                                                 | -  |
| 124 | No reported activity                                                     | Structural elucidation only                                                                 | -  |
| 125 | No reported activity                                                     | Structural elucidation only                                                                 | -  |
| 126 | <i>In vitro</i> Anticholinesterase Activity                              | Inhibition (%) at 1 mg/mL; AChE: 15.0 ±1.08; BChE: 66.3±0.88                                | 30 |
| 127 | No reported activity                                                     | Structural elucidation only                                                                 | -  |
| 128 | No reported activity                                                     | Structural elucidation only                                                                 | -  |
| 129 | No reported activity                                                     | Structural elucidation only                                                                 | -  |
| 130 | No reported activity                                                     | Structural elucidation only                                                                 | -  |
| 131 | No reported activity                                                     | Structural elucidation only                                                                 | -  |
| 132 | Anti-HBV activity                                                        | Inhibitory potency against HBsAg secretion of 33.2% and against HBeAg secretion of 27.38%   | 5  |
| 133 | Antibacterial activity against <i>E. faecalis</i>                        | MIC ± SD = 20.83 µg/mL                                                                      | 26 |
|     | Insecticide activity against <i>C. pipiens</i>                           | LC <sub>50</sub> (ppm)= 8.26; LC <sub>90</sub> (ppm)= 154.18                                | 28 |
|     | Cytotoxicity activity                                                    | IC <sub>50</sub> (µg/mL): MCF-7= 117 ± 3.8; HEPG-2= 115 ± 3.5                               | 28 |
|     | Anti-inflammatory and anti-tumor properties                              | IC <sub>50</sub> = 33.30 µM (inhibitory effect on LPS-induced NO production in macrophages) | 32 |
| 134 | Antibacterial activity                                                   | MIC ± SD [µg/mL]: <i>S. aureus</i> : 16 ± 1.7; <i>E. coli</i> : 8 ± 0.5                     | 25 |
| 135 | Cytotoxicity activity                                                    | No activity against MCF-7 and HEPG-2                                                        | 33 |
| 136 | No reported activity                                                     | Structural elucidation only                                                                 | -  |
| 137 | No reported activity                                                     | Structural elucidation only                                                                 | -  |
| 138 | Antibacterial activity against <i>E. faecalis</i>                        | MIC ± SD = 250.0 µg/mL                                                                      | 26 |
| 139 | Antifungal activity against <i>Fusarium oxysporum</i>                    | IC <sub>50</sub> 13.61 µM                                                                   | 24 |
|     | Cytotoxic activity against A549 (human lung epithelia cancer cell line). | IC <sub>50</sub> A549 = 22.05 µM                                                            | 33 |
| 140 | No reported activity                                                     | Structural elucidation only                                                                 | -  |
| 141 | Cytotoxic activity                                                       | Inactive (>50 µM) against all four cell lines (T24, HepG2, SPC-A2, and A549)                | 33 |
| 142 | No reported activity                                                     | Structural elucidation only                                                                 | -  |
| 143 | No reported activity                                                     | Structural elucidation only                                                                 | -  |

|            |                                                                                                                                       |                                                                                                                           |    |
|------------|---------------------------------------------------------------------------------------------------------------------------------------|---------------------------------------------------------------------------------------------------------------------------|----|
| <b>144</b> | No reported activity                                                                                                                  | Structural elucidation only                                                                                               | -  |
| <b>145</b> | No reported activity                                                                                                                  | Structural elucidation only                                                                                               | -  |
| <b>146</b> | No reported activity                                                                                                                  | Structural elucidation only                                                                                               | -  |
| <b>147</b> | No reported activity                                                                                                                  | Structural elucidation only                                                                                               | -  |
| <b>148</b> | Insecticidal activity against <i>A. fabae</i><br>Antiviral activity: Inhibition effect on TSWV in <i>Nicotiana tabacum</i> cv.K326.   | Corrected mortality rate (%) = $73.4 \pm 2.9$<br>Protective effect: $16.2\% \pm 1.4$ ; Curative effect: $58.6\% \pm 1.8$  | 34 |
| <b>149</b> | Insecticidal activity against <i>A. fabae</i> .<br>Antiviral activity: Inhibition effect on TSWV in <i>Nicotiana tabacum</i> cv.K326. | Corrected mortality rate (%) = $36.5 \pm 2.5$<br>Protective effect: $21.7\% \pm 9.7$ ; Curative effect: $19.0\% \pm 1.5$  | 34 |
| <b>150</b> | Insecticidal activity against <i>A. fabae</i> .<br>Antiviral activity: Inhibition effect on TSWV in <i>Nicotiana tabacum</i> cv.K326. | Corrected mortality rate (%) = $48.1 \pm 4.3$<br>Protective effect: $23.8\% \pm 4.3$ ; Curative effect: $47.2\% \pm 4.9$  | 34 |
| <b>151</b> | Insecticidal activity against <i>A. fabae</i> .<br>Antiviral activity: Inhibition effect on TSWV in <i>Nicotiana tabacum</i> cv.K326. | Corrected mortality rate (%) = $43.2 \pm 2.2$<br>Protective effect: $23.2\% \pm 6.9$ ; Curative effect: $18.5\% \pm 10.5$ | 34 |
| <b>152</b> | Insecticidal activity against <i>A. fabae</i> .<br>Antiviral activity: Inhibition effect on TSWV in <i>Nicotiana tabacum</i> cv.K326. | Corrected mortality rate (%) = $48.5 \pm 4.8$<br>Protective effect: $57.2\% \pm 6.9$ ; Curative effect: $33.6\% \pm 6.1$  | 34 |
| <b>153</b> | Insecticidal activity against <i>A. fabae</i> .<br>Antiviral activity: Inhibition effect on TSWV in <i>Nicotiana tabacum</i> cv.K326. | Corrected mortality rate (%) = $64.1 \pm 5.8$<br>Protective effect: $18.8\% \pm 5.7$ ; Curative effect: $26.3\% \pm 4.1$  | 34 |
| <b>154</b> | Insecticidal activity against <i>A. fabae</i> .<br>Antiviral activity: Inhibition effect on TSWV in <i>Nicotiana tabacum</i> cv.K326. | Corrected mortality rate (%) = $42.6 \pm 5.0$<br>Protective effect: $12.5\% \pm 1.62$ ; Curative effect: $19.6\% \pm 1.3$ | 34 |
| <b>155</b> | Insecticidal activity against <i>A. fabae</i> .<br>Antiviral activity: Inhibition effect on TSWV in <i>Nicotiana tabacum</i> cv.K326. | Corrected mortality rate (%) = $58.5 \pm 5.9$<br>Protective effect: $40.2\% \pm 4.3$ ; Curative effect: $50.9\% \pm 1.6$  | 34 |
| <b>156</b> | No reported activity                                                                                                                  | Structural elucidation only                                                                                               | -  |
| <b>157</b> | Antibacterial activity                                                                                                                | MIC $\pm$ SD [ $\mu\text{g/mL}$ ] = <i>S. aureus</i> : $32 \pm 1.3$ ; <i>E. coli</i> : $32 \pm 2.5$                       | 25 |

|     |                                                                                                            |                                     |    |
|-----|------------------------------------------------------------------------------------------------------------|-------------------------------------|----|
| 158 | No reported activity                                                                                       | Structural elucidation only         | -  |
| 159 | No reported activity                                                                                       | Structural elucidation only         | -  |
| 160 | Antifungal activity against <i>Fusarium oxysporum</i>                                                      | IC <sub>50</sub> 21.52 µM           | 24 |
| 161 | Antifungal activity against <i>Fusarium oxysporum</i>                                                      | IC <sub>50</sub> 43.31 µM           | 24 |
| 162 | No reported activity                                                                                       | Structural elucidation only         | -  |
| 163 | No reported activity                                                                                       | Structural elucidation only         | -  |
| 164 | No reported activity                                                                                       | Structural elucidation only         | -  |
| 165 | No reported activity                                                                                       | Structural elucidation only         | -  |
| 166 | No reported activity                                                                                       | Structural elucidation only         | -  |
| 167 | No reported activity                                                                                       | Structural elucidation only         | -  |
| 168 | No reported activity                                                                                       | Structural elucidation only         | -  |
| 169 | No reported activity                                                                                       | Structural elucidation only         | -  |
| 170 | No reported activity                                                                                       | Structural elucidation only         | -  |
| 171 | No reported activity                                                                                       | Structural elucidation only         | -  |
| 172 | No reported activity                                                                                       | Structural elucidation only         | -  |
| 173 | No reported activity                                                                                       | Structural elucidation only         | -  |
| 174 | Antifungal activity against <i>Fusarium oxysporum</i>                                                      | IC <sub>50</sub> 27.40 µM           | 24 |
|     | Antivirulence activity for Preventing <i>Cryptococcus neoformans</i> from Crossing the Blood-Brain Barrier | IC <sub>50</sub> < 10 µM            | 35 |
|     | Feeding activity in rainbow trout                                                                          | Recommended dietary dose: 500 mg/kg | 36 |
| 175 | No reported activity                                                                                       | Structural elucidation only         | -  |
| 175 | No reported activity                                                                                       | Structural elucidation only         | -  |
| 176 | No reported activity                                                                                       | Structural elucidation only         | -  |
| 177 | No reported activity                                                                                       | Structural elucidation only         | -  |
| 178 | No reported activity                                                                                       | Structural elucidation only         | -  |
| 179 | Cytotoxicity activity against murine lymphoma L1210 cells                                                  | IC <sub>50</sub> 4.9 µg/mL          | 37 |
| 180 | Cytotoxicity activity against murine lymphoma L1210 cells                                                  | IC <sub>50</sub> 7.5 µg/mL          | 37 |
| 181 | Cytotoxicity activity against murine lymphoma L1210 cells                                                  | IC <sub>50</sub> 6.5 µg/mL          | 37 |
| 182 | Cytotoxicity activity against murine lymphoma L1210 cells                                                  | IC <sub>50</sub> 7.8 µg/mL          | 37 |

|     |                                                                                                                          |                                                                                                                                                                   |    |
|-----|--------------------------------------------------------------------------------------------------------------------------|-------------------------------------------------------------------------------------------------------------------------------------------------------------------|----|
| 183 | Cytotoxicity activity against murine lymphoma L1210 cells                                                                | IC <sub>50</sub> 8.2 µg/mL                                                                                                                                        | 37 |
| 184 | No reported activity                                                                                                     | Structural elucidation only                                                                                                                                       | -  |
| 185 | No reported activity                                                                                                     | Structural elucidation only                                                                                                                                       | -  |
| 186 | Cytotoxic activity                                                                                                       | (IC <sub>50</sub> µM) TE-671= 8±6<br>(IC <sub>50</sub> µM) SH-SY5Y= 51±25<br>(IC <sub>50</sub> µM) IMR-32= 15±8<br>(IC <sub>50</sub> µM) K-177 = 58±44            | 38 |
| 187 | Cytotoxic activity                                                                                                       | IC <sub>50</sub> = 1.8-8.5 µg/mL at 9 µg/mL<br>LC <sub>50</sub> =10.1-24.7 µg/mL at 25 µg/mL                                                                      | 39 |
| 188 | Cytotoxic activity (inhibit growth of murine leukemia and human solid tumor cell lines (P-388, A-549, U-251, and SNI2KI) | IC <sub>50</sub> = 1.8-8.5 µg/mL at 9 µg/mL<br>LC <sub>50</sub> =10.1-24.7 µg/mL at 25 µg/mL                                                                      | 39 |
| 189 | Potent blockers of α4β2 and α 7 (Neuronal Nicotinic Acetylcholine Receptors)                                             | IC <sub>50</sub> = α4β2 (1 µM ACh) = 1.5 µM; α7 (100 µM ACh) = 1.3 µM                                                                                             | 40 |
| 190 | No reported activity                                                                                                     | Structural elucidation only                                                                                                                                       | -  |
| 191 | No reported activity                                                                                                     | Structural elucidation only                                                                                                                                       | -  |
| 192 | No reported activity                                                                                                     | Structural elucidation only                                                                                                                                       | -  |
| 193 | No reported activity                                                                                                     | Structural elucidation only                                                                                                                                       | -  |
| 194 | No reported activity                                                                                                     | Structural elucidation only                                                                                                                                       | -  |
| 195 | No reported activity                                                                                                     | Structural elucidation only                                                                                                                                       | -  |
| 196 | No reported activity                                                                                                     | Structural elucidation only                                                                                                                                       | -  |
| 197 | No reported activity                                                                                                     | Structural elucidation only                                                                                                                                       | -  |
| 198 | Cytotoxic activity against HL-60 cells (Human leukemia)                                                                  | HL-60 cells (IC <sub>50</sub> 39 µM)                                                                                                                              | 41 |
| 199 | Cytotoxicity activity against HL-60, SMMC-7721, A-549, MCF-7, and SW480 cancer cell lines                                | Inactive against the above five human cancer cell lines (IC <sub>50</sub> >100 µM).                                                                               | 6  |
| 200 | No reported activity                                                                                                     | Structural elucidation only                                                                                                                                       | -  |
| 201 | No reported activity                                                                                                     | Structural elucidation only                                                                                                                                       | -  |
| 202 | Antiviral activity against CVB3 (Coxsackievirus B3)<br><br>Antimicrobial Activity                                        | IC <sub>50</sub> 4.66 µM<br><br><i>S. aureus</i> (ATCC 29213) MIC= 6.0 g/L<br><i>S. aureus</i> (ATCC 33591) MIC= 8.0 g/L<br><i>E. coli</i> (ATCC 25922) = 0.8 g/L | 42 |
| 203 | No reported activity                                                                                                     | Structural elucidation only                                                                                                                                       | -  |
| 204 | No reported activity                                                                                                     | Structural elucidation only                                                                                                                                       | -  |
| 205 | No reported activity                                                                                                     | Structural elucidation only                                                                                                                                       | -  |

|     |                                                                                                                 |                                                                                                                                                                                                                                         |    |
|-----|-----------------------------------------------------------------------------------------------------------------|-----------------------------------------------------------------------------------------------------------------------------------------------------------------------------------------------------------------------------------------|----|
| 206 | Cytotoxic Activity                                                                                              | KB: IC <sub>50</sub> 0.554 µM; HepG-2: IC <sub>50</sub> 0.501 µM; LU-1: IC <sub>50</sub> 0.607 µM; MCF-7: IC <sub>50</sub> 0.686 µM                                                                                                     | 43 |
| 207 | Cytotoxic Activity against HCT-116 cell line                                                                    | % Inhibition = -6.2 (No appreciable effect)                                                                                                                                                                                             | 44 |
| 208 | Cytotoxic Activity against HCT-116 cell line                                                                    | % Inhibition = -13.1 (No appreciable effect)                                                                                                                                                                                            | 44 |
| 209 | Cytotoxic Activity against HCT-116 cell line                                                                    | % Inhibition = -3.2 (No appreciable effect)                                                                                                                                                                                             | 44 |
| 210 | Cytotoxic Activity against HCT-116 cell line                                                                    | % Inhibition = 0.7 (No appreciable effect)                                                                                                                                                                                              | 44 |
| 211 | Cytotoxic Activity against HCT-116 cell line                                                                    | % Inhibition = 80.2                                                                                                                                                                                                                     | 44 |
| 212 | No reported activity                                                                                            | Structural elucidation only                                                                                                                                                                                                             | -  |
| 213 | No reported activity                                                                                            | Structural elucidation only                                                                                                                                                                                                             | -  |
| 214 | Antibacterial activity                                                                                          | MIC= 100 µg/mL ( <i>Proteus mirabilis</i> )<br>MIC= 100 µg/mL ( <i>Klebsiella pneumoniae</i> )<br>MIC= 150 µg/mL ( <i>Escherichia coli</i> )<br>MIC= 150 µg/mL ( <i>P. vulgaris</i> )<br>MIC= 150 µg/mL ( <i>Shigella dysenteriae</i> ) | 45 |
| 215 | No reported activity                                                                                            | Structural elucidation only                                                                                                                                                                                                             | -  |
| 216 | Cytotoxic activity against B16 melanoma cells                                                                   | Inhibition (%) = 47.2±3.8                                                                                                                                                                                                               | 46 |
| 217 | Cytotoxic activity against B16 melanoma cells                                                                   | Inhibition (%) = 19.21±2.6                                                                                                                                                                                                              | 46 |
| 218 | Cytotoxic activity against B16 melanoma cells                                                                   | Inhibition (%) = 23.0±4.1                                                                                                                                                                                                               | 46 |
| 219 | Cytotoxic activity against B16 melanoma cells                                                                   | Inhibition (%) = -0.6±10.3                                                                                                                                                                                                              | 46 |
| 220 | No reported activity                                                                                            | Structural elucidation only                                                                                                                                                                                                             | -  |
| 221 | Antiviral activity (Inhibition effect on TSWV in <i>Nicotiana tabacum</i> cv.K326)<br><br>Insecticidal activity | Average inhibition rate (%): Protective effect: 16.2% ± 1.4;<br>Curative effect: 58.6% ± 1.8<br><br>LC <sub>50</sub> <i>A. fabae</i> = 25.2 mg/L,                                                                                       | 34 |
| 222 | Cytotoxicity against murine lymphoma L1210                                                                      | IC <sub>50</sub> 0.1 µg/mL                                                                                                                                                                                                              | 47 |
| 223 | Cytotoxicity against murine lymphoma L1210                                                                      | IC <sub>50</sub> 7.5 µg/mL                                                                                                                                                                                                              | 37 |
| 224 | Cytotoxicity against murine lymphoma L1210                                                                      | IC <sub>50</sub> 0.1 µg/mL                                                                                                                                                                                                              | 48 |
| 225 | Cytotoxicity against murine lymphoma L1210                                                                      | IC <sub>50</sub> 1.2 µg/mL                                                                                                                                                                                                              | 48 |
| 226 | Cytotoxicity against murine lymphoma L1210                                                                      | IC <sub>50</sub> 0.8 µg/mL                                                                                                                                                                                                              | 48 |
| 227 | Cytotoxicity against murine lymphoma L1210                                                                      | IC <sub>50</sub> 0.6 µg/mL                                                                                                                                                                                                              | 48 |
| 228 | No reported activity                                                                                            | Structural elucidation only                                                                                                                                                                                                             | -  |

|     |                                                                                                                      |                                                                                                                                                                                                                                           |    |
|-----|----------------------------------------------------------------------------------------------------------------------|-------------------------------------------------------------------------------------------------------------------------------------------------------------------------------------------------------------------------------------------|----|
| 229 | No reported activity                                                                                                 | Structural elucidation only                                                                                                                                                                                                               | -  |
| 230 | Cytotoxicity Activity against human blood premyelocytic leukemia (HL-60)                                             | No inhibition at 100 $\mu$ M                                                                                                                                                                                                              | 49 |
| 231 | Cytotoxicity Activity against human blood premyelocytic leukemia (HL-60)                                             | No inhibition at 100 $\mu$ M                                                                                                                                                                                                              | 49 |
| 232 | Cytotoxicity Activity against human blood premyelocytic leukemia (HL-60)                                             | 46% inhibition at 100 $\mu$ M                                                                                                                                                                                                             | 49 |
| 233 | Cytotoxicity against murine lymphoma L1210                                                                           | IC <sub>50</sub> , 10 $\mu$ g/mL                                                                                                                                                                                                          | 50 |
| 234 | Cytotoxicity against MM cell lines and patient cells                                                                 | IC <sub>50</sub> = 80–260 $\mu$ M for all cell lines and primary MM cells                                                                                                                                                                 | 51 |
|     | Cytotoxicity Activity against MG-63 and U2OS OS cells                                                                | The rate of late apoptotic cells at different concentrations (0.1, 0.2, and 0.4 mM) was:<br><b>MG-63</b> : 6.69 $\pm$ 0.89, 8.88 $\pm$ 1.19 and 14.8 $\pm$ 2.87%<br><b>U2OS</b> : 5.94 $\pm$ 1.34, 13.99 $\pm$ 1.92 and 24.18 $\pm$ 1.52% | 52 |
|     | Cytotoxicity Activity against papillary thyroid carcinoma (IHH-4) and anaplastic thyroid carcinoma (8505c and KMH-2) | (IHH-4) IC <sub>50</sub> 423.2, 161.7, and 148.8 $\mu$ M<br>(8505c) IC <sub>50</sub> 708.8, 222.0, and 214.4 $\mu$ M<br>(KMH-2) IC <sub>50</sub> 240.8, 221.2, and 208.0 $\mu$ M                                                          | 53 |
| 235 | Anti-HBV activities<br>Cytotoxicity Activity against HepG2 2.2.15 cells                                              | % inhibition (10 $\mu$ mol/mL):<br>HBsAg secretion: 13.94 $\pm$ 5.06<br>HBeAg secretion: 16.33 $\pm$ 2.96<br>HepG2 2.2.15 cells: 2.76 $\pm$ 3.91                                                                                          | 54 |
| 236 | Anti-HBV activities<br>Cytotoxicity Activity against HepG2 2.2.15 cells                                              | % inhibition (10 $\mu$ mol/mL);<br>HBsAg secretion: 7.88 $\pm$ 1.21<br>HBeAg secretion: 24.73 $\pm$ 8.85<br>HepG2 2.2.15 cells: 2.86 $\pm$ 4.05                                                                                           | 54 |
| 237 | Anti-HBV activities                                                                                                  | % inhibition (1x10 <sup>-5</sup> mol/mL)<br>HBsAg secretion: 22.34 $\pm$ 4.38%<br>HBeAg secretion: 18.00 $\pm$ 5.01%                                                                                                                      | 55 |
| 238 | Anti-HBV activities                                                                                                  | % inhibition (10 $\mu$ mol/mL)<br>HBsAg secretion: 2.70 $\pm$ 3.36<br>HBeAg secretion: 26.26 $\pm$ 3.67                                                                                                                                   | 54 |
| 239 | Antifungal activity against <i>Fusarium oxysporum</i>                                                                | IC <sub>50</sub> , 95.53 $\mu$ M                                                                                                                                                                                                          | 24 |
|     |                                                                                                                      | MIC ca. 100 $\mu$ g/mL                                                                                                                                                                                                                    | 27 |



|     |                                                                                                                                                                            |                                 |    |
|-----|----------------------------------------------------------------------------------------------------------------------------------------------------------------------------|---------------------------------|----|
|     | Antimicrobial activity against <i>S. aureus</i> (ATCC 6538), <i>S. epidermidis</i> (ATCC 12228), <i>S. saprophyticum</i> (ATCC 15305), and <i>S. pyogenes</i> (ATCC 19615) |                                 |    |
| 240 | No reported activity                                                                                                                                                       | Structural elucidation only     | -  |
| 241 | No reported activity                                                                                                                                                       | Structural elucidation only     | -  |
| 242 | No reported activity                                                                                                                                                       | Structural elucidation only     | -  |
| 243 | No reported activity                                                                                                                                                       | Structural elucidation only     | -  |
| 244 | Cytotoxicity activity against the cancer lines U87 (glioblastoma), 518A2 (melanoma), and HCT116 (colon cancer)                                                             | IC <sub>50</sub> (72 h) < 50 μM | 56 |
| 245 | Cytotoxicity activity against the cancer lines U87 (glioblastoma), 518A2 (melanoma), and HCT116 (colon cancer)                                                             | IC <sub>50</sub> (72 h) < 50 μM | 56 |
| 246 | No reported activity                                                                                                                                                       | Structural elucidation only     | -  |
| 247 | No reported activity                                                                                                                                                       | Structural elucidation only     | -  |
| 248 | No reported activity                                                                                                                                                       | Structural elucidation only     | -  |
| 249 | No reported activity                                                                                                                                                       | Structural elucidation only     | -  |
| 250 | No reported activity                                                                                                                                                       | Structural elucidation only     | -  |
| 251 | Antibacterial activity against <i>E. faecalis</i>                                                                                                                          | MIC = 208.33 μg/mL              | 26 |
| 252 | Cytotoxicity against murine lymphoma L1210                                                                                                                                 | IC <sub>50</sub> 8.9 μg/mL      | 37 |
| 253 | anti-acetylcholinesterase (AChE) activity (from electric eel)                                                                                                              | IC <sub>50</sub> 330 μM         | 37 |
| 254 | anti-acetylcholinesterase (AChE) activity (from electric eel)                                                                                                              | IC <sub>50</sub> 220 μM         | 37 |
| 255 | anti-acetylcholinesterase (AChE) activity and neuroprotective effects                                                                                                      | Inactive                        | 57 |
| 256 | anti-acetylcholinesterase (AChE) activity and neuroprotective effects                                                                                                      | Inactive                        | 57 |
| 257 | anti-acetylcholinesterase (AChE) activity and neuroprotective effects                                                                                                      | Inactive                        | 57 |
| 258 | anti-acetylcholinesterase (AChE) activity and neuroprotective effects                                                                                                      | Inactive                        | 57 |
| 259 | anti-acetylcholinesterase (AChE) activity and neuroprotective effects                                                                                                      | Inactive                        | 57 |
| 260 | Antimalarial activity against <i>P. falciparum</i>                                                                                                                         | IC <sub>50</sub> = 5 μg/mL      | 58 |
| 261 | No reported activity                                                                                                                                                       | Structural elucidation only     | -  |

|     |                                                                                                                                                                                                                                                |                                                                                                                                                                                                                   |    |
|-----|------------------------------------------------------------------------------------------------------------------------------------------------------------------------------------------------------------------------------------------------|-------------------------------------------------------------------------------------------------------------------------------------------------------------------------------------------------------------------|----|
| 262 | No reported activity                                                                                                                                                                                                                           | Structural elucidation only                                                                                                                                                                                       | -  |
| 263 | No reported activity                                                                                                                                                                                                                           | Structural elucidation only                                                                                                                                                                                       | -  |
| 264 | No reported activity                                                                                                                                                                                                                           | Structural elucidation only                                                                                                                                                                                       | -  |
| 265 | No reported activity                                                                                                                                                                                                                           | Structural elucidation only                                                                                                                                                                                       | -  |
| 266 | No reported activity                                                                                                                                                                                                                           | Structural elucidation only                                                                                                                                                                                       | -  |
| 267 | Antimalarial activity against <i>P. falciparum</i>                                                                                                                                                                                             | IC <sub>50</sub> >20 µg/mL                                                                                                                                                                                        | 58 |
| 268 | No reported activity                                                                                                                                                                                                                           | Structural elucidation only                                                                                                                                                                                       | -  |
| 269 | No reported activity                                                                                                                                                                                                                           | Structural elucidation only                                                                                                                                                                                       | -  |
| 270 | No reported activity                                                                                                                                                                                                                           | Structural elucidation only                                                                                                                                                                                       | -  |
| 271 | No reported activity                                                                                                                                                                                                                           | Structural elucidation only                                                                                                                                                                                       | -  |
| 272 | Antimalarial activity and cytotoxicity                                                                                                                                                                                                         | IC <sub>50</sub> = 2.5 ng/mL (6.11 nM) and 2.1 ng/mL (5.13 nM) against K1 and FCR3<br>IC <sub>50</sub> = 10 ng/mL (24.45 nM) against MRC5                                                                         | 59 |
| 273 | Cytotoxicity against KB (mouth epidermal carcinoma cells, CCL-17), HepG-2 (human liver hepatocellular carcinoma cells, HB-8065), LU-1 (human lung adenocarcinoma cells, HTB-57 <sup>TM</sup> ), and MCF-7 (human breast cancer cells, HTB-22). | KB: IC <sub>50</sub> , =0.663 µM<br>HepG-2: IC <sub>50</sub> , =0.796 µM<br>LU-1: IC <sub>50</sub> , =0.663 µM<br>MCF-7: IC <sub>50</sub> , =0.637 µM                                                             | 43 |
| 274 | Cytotoxicity against KB (mouth epidermal carcinoma cells, CCL-17), HepG-2 (human liver hepatocellular carcinoma cells, HB-8065), LU-1 (human lung adenocarcinoma cells, HTB-57 <sup>TM</sup> ), and MCF-7 (human breast cancer cells, HTB-22). | KB: IC <sub>50</sub> , =0.025 µM<br>HepG-2: IC <sub>50</sub> , =0.027 µM<br>LU-1: IC <sub>50</sub> , =0.110 µM<br>MCF-7: IC <sub>50</sub> , =0.744 µM                                                             | 43 |
| 275 | Cytotoxicity against KB (mouth epidermal carcinoma cells, CCL-17), HepG-2 (human liver hepatocellular carcinoma cells, HB-8065), LU-1 (human lung adenocarcinoma cells, HTB-57 <sup>TM</sup> ), and MCF-7 (human breast cancer cells, HTB-22). | KB: IC <sub>50</sub> , =0.398 µM<br>HepG-2: IC <sub>50</sub> , =0.186 µM<br>LU-1: IC <sub>50</sub> , =0.504 µM<br>MCF-7: IC <sub>50</sub> , =0.398 µM                                                             | 43 |
| 276 | Cytotoxicity                                                                                                                                                                                                                                   | IC <sub>50</sub> (nM): A549= 0.7 ± 0.1<br>IC <sub>50</sub> (nM): MRC-5= 2.6 ± 0.4<br>IC <sub>50</sub> (nM): MRC-9= 2.2 ± 0.7<br>IC <sub>50</sub> (nM): BEL-7402= 1.7 ± 0.7<br>IC <sub>50</sub> (nM): LO2= 2.7 ± 1 | 60 |
| 277 | Anticancer Activity against the 9-KB carcinoma                                                                                                                                                                                                 | ED <sub>50</sub> = 0.00078 µg/mL                                                                                                                                                                                  | 61 |

|     |                                                                                                                                                            |                                                                                                                                                                                                                                                                                                                                                                                                                                                                                                      |    |
|-----|------------------------------------------------------------------------------------------------------------------------------------------------------------|------------------------------------------------------------------------------------------------------------------------------------------------------------------------------------------------------------------------------------------------------------------------------------------------------------------------------------------------------------------------------------------------------------------------------------------------------------------------------------------------------|----|
|     | Anticancer Activity against Human gastric cancer AGS (Hypoxia-Inducible Factor-1)                                                                          | HIF-1: IC <sub>50</sub> = 8.7 nM                                                                                                                                                                                                                                                                                                                                                                                                                                                                     | 62 |
| 278 | Cytotoxicity against 12 cell lines from 6 panels of cancer including lung cancer, colon cancer, breast cancer, prostate cancer, kidney cancer and leukemia | K562: GL <sub>50</sub> (ng/mL) = 100<br>HL60: GL <sub>50</sub> (ng/mL) = 5<br>DU145: GL <sub>50</sub> (ng/mL) = 2<br>PC-3: GL <sub>50</sub> (ng/mL) = 5<br>A545: GL <sub>50</sub> (ng/mL) = 0.3<br>NCI-H460: GL <sub>50</sub> (ng/mL) = 0.3<br>MCF-7: GL <sub>50</sub> (ng/mL) = 5<br>MDA-MD-231: GL <sub>50</sub> (ng/mL) = 3<br>ACHN: GL <sub>50</sub> (ng/mL) = 0.3<br>UO-31: GL <sub>50</sub> (ng/mL) = 0.4<br>HT-29: GL <sub>50</sub> (ng/mL) = 0.2<br>COLO-205: GL <sub>50</sub> (ng/mL) = 0.3 | 63 |
|     | Cytotoxicity against three cancer cell lines (CEM, HeLa and L1210) and two endothelial cell lines (HMEC-1, BAEC)                                           | HeLa IC <sub>50</sub> (nM) = 66 ± 56<br>CEM IC <sub>50</sub> (nM) = 185 ± 156<br>L-1210 IC <sub>50</sub> (nM) = 19 ± 10<br>HMEC-1 IC <sub>50</sub> (nM) = 7.4 ± 1.1<br>BAEC IC <sub>50</sub> (nM) = 23 ± 13                                                                                                                                                                                                                                                                                          | 64 |
| 279 | Cytotoxicity against 12 cell lines from 6 panels of cancer including lung cancer, colon cancer, breast cancer, prostate cancer, kidney cancer and leukemia | GL <sub>50</sub> (ng/mL) >100 (showed lower activity)                                                                                                                                                                                                                                                                                                                                                                                                                                                | 63 |
| 280 | No reported activity                                                                                                                                       | Structural elucidation only                                                                                                                                                                                                                                                                                                                                                                                                                                                                          | -  |
| 281 | No reported activity                                                                                                                                       | Structural elucidation only                                                                                                                                                                                                                                                                                                                                                                                                                                                                          | -  |
| 282 | No reported activity                                                                                                                                       | Structural elucidation only                                                                                                                                                                                                                                                                                                                                                                                                                                                                          | -  |
| 283 | No reported activity                                                                                                                                       | Structural elucidation only                                                                                                                                                                                                                                                                                                                                                                                                                                                                          | -  |
| 284 | No reported activity                                                                                                                                       | Structural elucidation only                                                                                                                                                                                                                                                                                                                                                                                                                                                                          | -  |
| 285 | Cytotoxicity activity against P388 cells                                                                                                                   | Inactive against P388 cells (>10 µg/mL).                                                                                                                                                                                                                                                                                                                                                                                                                                                             | 65 |
| 286 | Inhibitory activity against hPTP1B (human protein tyrosine phosphatase 1B)                                                                                 | Inactive                                                                                                                                                                                                                                                                                                                                                                                                                                                                                             | 66 |
| 287 | Inhibitory activity against hPTP1B (human protein tyrosine phosphatase 1B)                                                                                 | Inactive                                                                                                                                                                                                                                                                                                                                                                                                                                                                                             | 66 |
| 288 | Cytotoxicity activity against P388 cells                                                                                                                   | Inactive against P388 cells (>10 µg/mL).                                                                                                                                                                                                                                                                                                                                                                                                                                                             | 65 |
| 289 | No reported activity                                                                                                                                       | Structural elucidation only                                                                                                                                                                                                                                                                                                                                                                                                                                                                          | -  |
| 290 | No reported activity                                                                                                                                       | Structural elucidation only                                                                                                                                                                                                                                                                                                                                                                                                                                                                          | -  |
| 291 | No reported activity                                                                                                                                       | Structural elucidation only                                                                                                                                                                                                                                                                                                                                                                                                                                                                          | -  |

|     |                                                                     |                                                           |    |
|-----|---------------------------------------------------------------------|-----------------------------------------------------------|----|
| 292 | No reported activity                                                | Structural elucidation only                               | -  |
| 293 | No reported activity                                                | Structural elucidation only                               | -  |
| 294 | Activity against Hepatitis C Virus                                  | CC <sub>50</sub> (μM) = 119.1; EC <sub>50</sub> (μM) =4.7 | 67 |
| 295 | Activity against Hepatitis C Virus                                  | CC <sub>50</sub> (μM) = 119.1; EC <sub>50</sub> (μM) =4.7 | 67 |
| 296 | Activity against Hepatitis C Virus                                  | CC <sub>50</sub> (μM) = 169.3; EC <sub>50</sub> (μM) =2.2 | 67 |
| 297 | Activity against Hepatitis C Virus                                  | CC <sub>50</sub> (μM) = 169.3; EC <sub>50</sub> (μM) =2.2 | 67 |
| 298 | Antiviral activity against hepatitis B virus (in HepG 2.2.15 cells) | HBsAg (inhibition %) = 37.2; HBeAg (inhibition%) = 33.2   | 16 |
| 299 | Antiviral activity against hepatitis B virus (in HepG 2.2.15 cells) | HBsAg (inhibition %) = 30.8; HBeAg (inhibition%) = 16.8   | 16 |
| 300 | Antiviral activity against hepatitis B virus (in HepG 2.2.15 cells) | HBsAg (inhibition %) = 29.8; HBeAg (inhibition%) = 15.1   | 16 |
| 301 | Antiviral activity against hepatitis B virus (in HepG 2.2.15 cells) | HBsAg (inhibition %) = 44.3; HBeAg (inhibition%) = 38.0   | 16 |
| 302 | Antiviral activity against hepatitis B virus (in HepG 2.2.15 cells) | HBsAg (inhibition %) = 14.1                               | 16 |
| 303 | Antiviral activity against hepatitis B virus (in HepG 2.2.15 cells) | HBsAg (inhibition %) = 46.0; HBeAg (inhibition%) = 40.4   | 16 |
| 304 | Antiviral activity against hepatitis B virus (in HepG 2.2.15 cells) | Inactive against the secretion of both HBsAg and HBeAg.   | 55 |
| 305 | No reported activity                                                | Structural elucidation only                               | -  |
| 306 | No reported activity                                                | Structural elucidation only                               | -  |
| 307 | No reported activity                                                | Structural elucidation only                               | -  |
| 308 | No reported activity                                                | Structural elucidation only                               | -  |
| 309 | No reported activity                                                | Structural elucidation only                               | -  |
| 310 | No reported activity                                                | Structural elucidation only                               | -  |
| 311 | No reported activity                                                | Structural elucidation only                               | -  |
| 312 | No reported activity                                                | Structural elucidation only                               | -  |
| 313 | No reported activity                                                | Structural elucidation only                               | -  |
| 314 | No reported activity                                                | Structural elucidation only                               | -  |
| 315 | RLAR activity (rat lens aldose reductase)                           | % Inhibition= 25-32% (concentration: 50 μM)               | 68 |
| 316 | RLAR activity (rat lens aldose reductase)                           | % Inhibition= 25-32% (concentration: 50 μM)               | 68 |
| 317 | RLAR activity (rat lens aldose reductase)                           | % Inhibition= 25-32% (concentration: 50 μM)               | 68 |
| 318 | Antimalarial activity against <i>P. falciparum</i>                  | Inactive                                                  | 69 |
| 319 | Antimalarial activity against <i>P. falciparum</i>                  | Inactive                                                  | 69 |
| 320 | Antimalarial activity against <i>P. falciparum</i>                  | Inactive                                                  | 69 |
| 321 | Antimalarial activity against <i>P. falciparum</i>                  | Inactive                                                  | 69 |

|     |                                                                                        |                                                                                                                                                                                                                                       |    |
|-----|----------------------------------------------------------------------------------------|---------------------------------------------------------------------------------------------------------------------------------------------------------------------------------------------------------------------------------------|----|
| 322 | Antimalarial activity against <i>P. falciparum</i>                                     | IC <sub>50</sub> 4.76 µg/mL for both D6 and W2 clones                                                                                                                                                                                 | 69 |
| 323 | Antimalarial activity against <i>P. falciparum</i>                                     | Inactive                                                                                                                                                                                                                              | 69 |
| 324 | Antimalarial activity against <i>P. falciparum</i>                                     | Inactive                                                                                                                                                                                                                              | 69 |
| 325 | Antimalarial activity against <i>P. falciparum</i>                                     | IC <sub>50</sub> = 2.8 µg/mL for both D6 and W2 clones                                                                                                                                                                                | 69 |
| 326 | No reported activity                                                                   | Structural elucidation only                                                                                                                                                                                                           | -  |
| 327 | No reported activity                                                                   | Structural elucidation only                                                                                                                                                                                                           | -  |
| 328 | No activity                                                                            | Structural elucidation only                                                                                                                                                                                                           |    |
| 329 | RLAR activity (rat lens aldose reductase)                                              | % Inhibition= 25-32% (concentration: 50 µM)                                                                                                                                                                                           | 68 |
| 330 | No reported activity                                                                   | Structural elucidation only                                                                                                                                                                                                           | -  |
| 331 | No reported activity                                                                   | Structural elucidation only                                                                                                                                                                                                           | -  |
| 332 | No reported activity                                                                   | Structural elucidation only                                                                                                                                                                                                           | -  |
| 333 | Cytotoxic activity against HepG-2, HL-60, LU-1, MCF-7, and SK-Mel-2 human cancer cells | HepG-2: IC <sub>50</sub> (µM) = 6.85 ± 0.76<br>HL-60: IC <sub>50</sub> (µM) = 9.19 ± 0.72<br>LU-1: IC <sub>50</sub> (µM) = 9.88 ± 0.98<br>MCF-7: IC <sub>50</sub> (µM) = 7.82 ± 0.53<br>SK-Mel-2: IC <sub>50</sub> (µM) = 7.51 ± 0.69 | 70 |
| 334 | Cytotoxic effects against SNU-398, HT-29, and Capan-1 cell lines                       | SNU-398 IC <sub>50</sub> >50 µM<br>HT-29 IC <sub>50</sub> = 22.6±6.6 µM<br>Capan-1 IC <sub>50</sub> >50 µM                                                                                                                            | 71 |
|     | Cytotoxic activity against HL-60                                                       | IC <sub>50</sub> (µM) = 5.5                                                                                                                                                                                                           | 72 |
| 335 | Cytotoxic activity against HepG-2, HL-60, LU-1, MCF-7, and SK-Mel-2 human cancer cells | HepG-2: IC <sub>50</sub> (µM) = 0.75 ± 0.11<br>HL-60: IC <sub>50</sub> (µM) = 0.88 ± 0.07<br>LU-1: IC <sub>50</sub> (µM) = 0.96 ± 0.09<br>MCF-7: IC <sub>50</sub> (µM) = 0.79 ± 0.05<br>SK-Mel-2: IC <sub>50</sub> (µM) = 1.02 ± 0.11 | 70 |
|     | Antimalarial activity against <i>P. falciparum</i> African (D6) clone                  | D6 clone IC <sub>50</sub> = 670 ng/mL<br>W2 clone IC <sub>50</sub> = 280 ng/mL                                                                                                                                                        | 73 |
|     | Antituberculosis activity against H37Rv                                                | MIC = 3.94 µM                                                                                                                                                                                                                         | 73 |
| 336 | Cytotoxic effects against SNU-398, HT-29, and Capan-1 cell lines                       | SNU-398 IC <sub>50</sub> = 45.7±3.2 µM<br>HT-29 IC <sub>50</sub> = 12.0±4.3 µM<br>Capan-1 IC <sub>50</sub> = 32.5±3.3 µM                                                                                                              | 71 |
|     | Cytotoxic activity against HL-60                                                       | IC <sub>50</sub> (µM) = 5.5                                                                                                                                                                                                           | 72 |
| 337 | Cytotoxic activity against HepG-2, HL-60, LU-1, MCF-7, and SK-Mel-2 human cancer cells | HepG-2: IC <sub>50</sub> (µM) = 30.35 ± 3.04<br>HL-60: IC <sub>50</sub> (µM) = 22.95 ± 0.95                                                                                                                                           | 70 |

|     |                                                                                        |                                                                                                                                                                                                                                            |    |
|-----|----------------------------------------------------------------------------------------|--------------------------------------------------------------------------------------------------------------------------------------------------------------------------------------------------------------------------------------------|----|
|     |                                                                                        | LU-1: IC <sub>50</sub> (μM) = 32.59 ± 2.56<br>MCF-7: IC <sub>50</sub> (μM) = 24.85 ± 1.21<br>SK-Mel-2: IC <sub>50</sub> (μM) = 35.92 ± 4.87                                                                                                |    |
| 338 | Cytotoxic effects against SNU-398, HT-29, and Capan-1 cell lines                       | SNU-398 IC <sub>50</sub> >50 μM<br>HT-29 IC <sub>50</sub> = 23.2±2.7 μM<br>Capan-1 IC <sub>50</sub> >50 μM                                                                                                                                 | 71 |
| 339 | Vasodilative activity                                                                  | Inactive IC <sub>50</sub> > 100 μM                                                                                                                                                                                                         | 74 |
| 340 | Vasodilative activity                                                                  | Inactive IC <sub>50</sub> > 100 μM                                                                                                                                                                                                         | 74 |
| 341 | Vasodilative activity                                                                  | Inactive IC <sub>50</sub> > 100 μM                                                                                                                                                                                                         | 74 |
| 342 | Vasodilative activity                                                                  | Inactive IC <sub>50</sub> > 100 μM                                                                                                                                                                                                         | 74 |
| 343 | Antimalarial activity against <i>P. falciparum</i> African (D6) clone                  | Inactive                                                                                                                                                                                                                                   | 73 |
| 344 | Cytotoxic activity against HepG-2, HL-60, LU-1, MCF-7, and SK-Mel-2 human cancer cells | HepG-2: IC <sub>50</sub> (μM) = 19.52 ± 1.45<br>HL-60: IC <sub>50</sub> (μM) = 16.79 ± 0.74<br>LU-1: IC <sub>50</sub> (μM) = 22.25 ± 1.26<br>MCF-7: IC <sub>50</sub> (μM) = 24.85 ± 0.91<br>SK-Mel-2: IC <sub>50</sub> (μM) = 23.04 ± 2.47 | 70 |
| 345 | Cytotoxic activity against HL-60                                                       | IC <sub>50</sub> (μM) = 5.5                                                                                                                                                                                                                | 72 |
| 346 | Cytotoxic activity against HepG-2, HL-60, LU-1, MCF-7, and SK-Mel-2 human cancer cells | HepG-2: IC <sub>50</sub> (μM) = 6.58 ± 0.94<br>HL-60: IC <sub>50</sub> (μM) = 7.84 ± 0.85<br>LU-1: IC <sub>50</sub> (μM) = 9.20 ± 1.21<br>MCF-7: IC <sub>50</sub> (μM) = 7.36 ± 1.16<br>SK-Mel-2: IC <sub>50</sub> (μM) = 11.23 ± 0.33     | 70 |
| 347 | Cytotoxic activity against HepG-2, HL-60, LU-1, MCF-7, and SK-Mel-2 human cancer cells | HepG-2: IC <sub>50</sub> (μM) = 5.06 ± 0.39<br>HL-60: IC <sub>50</sub> (μM) = 5.65 ± 0.42<br>LU-1: IC <sub>50</sub> (μM) = 5.63 ± 0.19<br>MCF-7: IC <sub>50</sub> (μM) = 5.32 ± 0.67<br>SK-Mel-2: IC <sub>50</sub> (μM) = 5.45 ± 0.91      | 70 |
| 348 | Cytotoxic activity against HepG-2, HL-60, LU-1, MCF-7, and SK-Mel-2 human cancer cells | HepG-2: IC <sub>50</sub> (μM) = 5.55 ± 0.98<br>HL-60: IC <sub>50</sub> (μM) = 6.58 ± 0.94<br>LU-1: IC <sub>50</sub> (μM) = 5.84 ± 0.45<br>MCF-7: IC <sub>50</sub> (μM) = 5.68 ± 0.89<br>SK-Mel-2: IC <sub>50</sub> (μM) = 6.24 ± 0.96      | 70 |
| 349 | Cytotoxic activity against HepG-2, HL-60, LU-1, MCF-7, and SK-Mel-2 human cancer cells | HepG-2: IC <sub>50</sub> (μM) = 0.43 ± 0.03<br>HL-60: IC <sub>50</sub> (μM) = 0.62 ± 0.08<br>LU-1: IC <sub>50</sub> (μM) = 0.76 ± 0.09<br>MCF-7: IC <sub>50</sub> (μM) = 0.44 ± 0.05<br>SK-Mel-2: IC <sub>50</sub> (μM) = 0.77 ± 0.13      | 70 |

|            |                                                                                                                                                                                                                               |                                                                                                                                                                                                                                    |              |
|------------|-------------------------------------------------------------------------------------------------------------------------------------------------------------------------------------------------------------------------------|------------------------------------------------------------------------------------------------------------------------------------------------------------------------------------------------------------------------------------|--------------|
| <b>350</b> | No reported activity                                                                                                                                                                                                          | Structural elucidation only                                                                                                                                                                                                        | -            |
| <b>351</b> | Activity antimicrobial against a fluconazole-resistant strain of <i>Candida albicans</i> ATCC 14503.                                                                                                                          | (MIC, µg/mL)<br><i>C. albicans</i> ATCC 14503 = 100<br><i>C. albicans</i> UCD-FR1 = 100<br><i>C. glabrata</i> = 100<br><i>C. krusei</i> = 100                                                                                      | 75           |
| <b>352</b> | Cytotoxic activity against KB and L1210 cells                                                                                                                                                                                 | (KB) ED <sub>50</sub> (µg/mL) = 2.5<br>(L1210) ED <sub>50</sub> (µg/mL) = 2.0                                                                                                                                                      | 76           |
|            | Somatostatin and Vasoactive Intestinal Peptide Inhibitors.                                                                                                                                                                    | IC <sub>50</sub> = 12 µM                                                                                                                                                                                                           | 77           |
| <b>353</b> | Potent inhibitor of the inositol 1,4,5-trisphosphate receptor and the endoplasmic-reticulum Ca <sup>2+</sup> pumps<br><br>Activity antimicrobial against a fluconazole-resistant strain of <i>Candida albicans</i> ATCC 14503 | 78% inhibition<br><br>(MIC, µg/mL)<br><i>C. albicans</i> ATCC 14503 = 100<br><i>C. albicans</i> UCD-FR1 = 100<br><i>C. glabrata</i> = 30<br><i>C. krusei</i> = 30                                                                  | 78<br><br>75 |
| <b>354</b> | Cytotoxic activity against KB and L1210 cells<br><br>Activity antimicrobial against a fluconazole-resistant strain of <i>Candida albicans</i> ATCC 1450                                                                       | (KB) ED <sub>50</sub> (µg/mL) = 2.0<br>(L1210) ED <sub>50</sub> (µg/mL) = 0.2<br><br>(MIC, µg/mL)<br><i>C. albicans</i> ATCC 14503 = 100<br><i>C. albicans</i> UCD-FR1 = 100<br><i>C. glabrata</i> = 100<br><i>C. krusei</i> = 100 | 76<br><br>75 |
| <b>355</b> | Cytotoxic activity against breast-cancer cell lines MCF-7, T-47D, ZR-75-1 and MDA-MB-231                                                                                                                                      | ED <sub>50</sub> values (µg/mL)<br>MCF-7 >>50<br>T-47D >50<br>ZR-75-1 = ND<br>MDA-MB-231 = ND                                                                                                                                      | 79           |
| <b>356</b> | No reported activity                                                                                                                                                                                                          | Structural elucidation only                                                                                                                                                                                                        | -            |
| <b>357</b> | No reported activity                                                                                                                                                                                                          | Structural elucidation only                                                                                                                                                                                                        | -            |
| <b>358</b> | No reported activity                                                                                                                                                                                                          | Structural elucidation only                                                                                                                                                                                                        | -            |
| <b>359</b> | No reported activity                                                                                                                                                                                                          | Structural elucidation only                                                                                                                                                                                                        | -            |

|            |                                                                                                      |                                                                                                                                                 |    |
|------------|------------------------------------------------------------------------------------------------------|-------------------------------------------------------------------------------------------------------------------------------------------------|----|
| <b>360</b> | Activity antimicrobial against a fluconazole-resistant strain of <i>Candida albicans</i> ATCC 14503. | Inactive                                                                                                                                        | 75 |
| <b>361</b> | No reported activity                                                                                 | Structural elucidation only                                                                                                                     | -  |
| <b>362</b> | No reported activity                                                                                 | Structural elucidation only                                                                                                                     | -  |
| <b>363</b> | No reported activity                                                                                 | Structural elucidation only                                                                                                                     | -  |
| <b>364</b> | Cytotoxic activity against HepG-2, HL-60, LU-1, MCF-7, and SK-Mel-2 human cancer cells               | Inactive IC <sub>50</sub> > 50 µM.                                                                                                              | 70 |
|            | Anti-HIV activity                                                                                    | EC <sub>50</sub> = 41.3 µM                                                                                                                      | 80 |
|            | Cytotoxic activity against MT2 cell line                                                             | CC <sub>0</sub> (µM) = 13.4<br>CC <sub>50</sub> (µM) = 178.1                                                                                    | 80 |
| <b>365</b> | Cytotoxic activity against HepG-2, HL-60, LU-1, MCF-7, and SK-Mel-2 human cancer cells               | Inactive IC <sub>50</sub> > 50 µM.                                                                                                              | 70 |
|            | Anti-HIV activity                                                                                    | EC <sub>50</sub> = 52.9 µM                                                                                                                      | 80 |
|            | Cytotoxic activity against MT2 cell line                                                             | CC <sub>0</sub> (µM) = 12.1<br>CC <sub>50</sub> (µM) = 371.3                                                                                    | 80 |
| <b>366</b> | No reported activity                                                                                 | Structural elucidation only                                                                                                                     | -  |
| <b>367</b> | No reported activity                                                                                 | Structural elucidation only                                                                                                                     | -  |
| <b>368</b> | Cytotoxicity against SNU-398, HT-29, and Capan-1                                                     | IC <sub>50</sub> > 50 µM                                                                                                                        | 71 |
| <b>369</b> | Cytotoxicity against SNU-398, HT-29, and Capan-1                                                     | IC <sub>50</sub> > 50 µM                                                                                                                        | 71 |
| <b>370</b> | Antiviral activity                                                                                   | Inhibition effect on TSWV in <i>Nicotiana tabacum</i> cv.K326<br>Inhibition rate: Protective effect= 21.7% ± 9.7; Curative effect: 19.0% ± 1.5  | 34 |
|            | Insecticidal activity against <i>A. fabae</i>                                                        | Corrected mortality rate (%):36.5 ± 2.5                                                                                                         |    |
| <b>371</b> | Antiviral activity                                                                                   | Inhibition effect on TSWV in <i>Nicotiana tabacum</i> cv.K326<br>Inhibition rate: Protective effect= 23.8% ± 4.3; Curative effect: 47.2% ± 4.9  | 34 |
|            | Insecticidal activity against <i>A. fabae</i>                                                        | Corrected mortality rate (%): 48.1 ± 4.3                                                                                                        |    |
| <b>372</b> | Antiviral activity                                                                                   | Inhibition effect on TSWV in <i>Nicotiana tabacum</i> cv.K326<br>Inhibition rate: Protective effect= 23.2% ± 6.9; Curative effect: 18.5% ± 10.5 | 34 |
|            | Insecticidal activity against <i>A. fabae</i>                                                        | Corrected mortality rate (%):43.2 ± 2.2                                                                                                         |    |



|            |                                                                                                                         |                                                                                                                                                                                                                                                                                            |    |
|------------|-------------------------------------------------------------------------------------------------------------------------|--------------------------------------------------------------------------------------------------------------------------------------------------------------------------------------------------------------------------------------------------------------------------------------------|----|
| <b>373</b> | Antiviral activity<br>Insecticidal activity against <i>A. fabae</i>                                                     | Inhibition effect on TSWV in <i>Nicotiana tabacum</i> cv.K326<br>Inhibition rate: Protective effect= 57.2% ± 6.9; Curative effect: 33.6% ± 6.1<br><br>Corrected mortality rate (%):48.5 ± 4.8                                                                                              | 34 |
| <b>374</b> | Antiviral activity<br>Insecticidal activity against <i>A. fabae</i>                                                     | Inhibition effect on TSWV in <i>Nicotiana tabacum</i> cv.K326<br>Inhibition rate: Protective effect= 77.2% ± 4.0; Curative effect: 42.9% ± 2.2<br><br>Corrected mortality rate (%):41.2 ± 3.9                                                                                              | 34 |
| <b>375</b> | Antiviral activity<br>Insecticidal activity                                                                             | Inhibition effect on TSWV in <i>Nicotiana tabacum</i> cv.K326<br>Inhibition rate: Protective effect= 62.7 ± 3.7; Curative effect: 75.0 ± 2.9<br><br>Corrected mortality rate (%):<br><i>A. fabae</i> : 60.9 ± 1.9<br><i>N. lugens</i> (Stal): 67.0 ± 8.2<br><i>T. urticae</i> : 37.6 ± 4.9 | 29 |
| <b>376</b> | Antiviral activity<br>Insecticidal activity against <i>A. fabae</i>                                                     | Inhibition effect on TSWV in <i>Nicotiana tabacum</i> cv.K326<br>Inhibition rate: Protective effect= 25.7 ± 2.4; Curative effect: 19.1 ± 5.3<br><br>Corrected mortality rate (%):<br><i>A. fabae</i> : 48.5 ± 4.8<br><i>N. lugens</i> (Stal): 68.7 ± 4.7<br><i>T. urticae</i> : 56.0 ± 7.1 | 29 |
| <b>377</b> | Anti-inflammatory activity in LPS-Stimulated RAW 264.7 Cells                                                            | TNF- $\alpha$ (%) = 96.64 ± 1.27<br>IL-6 (%) = 67.85 ± 0.44                                                                                                                                                                                                                                | 11 |
| <b>378</b> | Anti-inflammatory activity in LPS-Stimulated RAW 264.7 Cells                                                            | TNF- $\alpha$ (%) = 50.05 ± 6.56<br>IL-6 (%) = 52.87 ± 3.22                                                                                                                                                                                                                                | 11 |
| <b>379</b> | Anti-inflammatory activity in LPS-Stimulated RAW 264.7 Cells                                                            | TNF- $\alpha$ (%) = 49.59 ± 0.51<br>IL-6 (%) = 73.90 ± 0.34                                                                                                                                                                                                                                | 11 |
| <b>380</b> | Anti-inflammatory activity in LPS-Stimulated RAW 264.7 Cells                                                            | TNF- $\alpha$ (%) = 70.86 ± 0.31<br>IL-6 (%) = 60.08 ± 1.66                                                                                                                                                                                                                                | 11 |
| <b>381</b> | Anti-inflammatory activity in LPS-Stimulated RAW 264.7 Cells                                                            | TNF- $\alpha$ (%) = 69.14 ± 2.18<br>IL-6 (%) = no activity                                                                                                                                                                                                                                 | 11 |
| <b>382</b> | Cytotoxic activity against A549, KB, KB-VIN, and MDAMB- 231 cell lines<br><br>Contact toxicity against <i>S. litura</i> | (ED <sub>50</sub> >20 $\mu$ M)<br><br>After five days, 50% of larvae were killed (3 mg/mL in EtOH)                                                                                                                                                                                         | 81 |
| <b>383</b> | anti-HBV activity in HepG2.2.15 cells                                                                                   | HBsAg (inhibition %)=15.6 ± 0.7; HBeAg (inhibition %)=11.3 ± 0.2                                                                                                                                                                                                                           | 10 |

|            |                                                                             |                                                                                                                            |    |
|------------|-----------------------------------------------------------------------------|----------------------------------------------------------------------------------------------------------------------------|----|
| <b>384</b> | Hepatoprotective activity against APAP-induced hepatotoxicity in HepG2 cell | Exhibited excellent hepatoprotective activities in acetaminophen-induced liver injury <i>in vitro</i> and <i>in vivo</i> . | 82 |
| <b>385</b> | Hepatoprotective activity                                                   | Inactive                                                                                                                   | 82 |
| <b>386</b> | Hepatoprotective activity                                                   | Inactive                                                                                                                   | 82 |
| <b>387</b> | Antiviral activity against the Hepatitis B Virus                            | HBsAg secretion = 39.8% (concentration of 0.035 mM)<br>HBeAg secretion = 21.5 % (concentration of 0.035 mM)                | 10 |
| <b>388</b> | Antiviral activity against the Hepatitis B Virus                            | HBsAg secretion = 32.4% (concentration of 0.035 mM)<br>HBeAg secretion = 20.8% (concentration of 0.035 mM)                 | 10 |
| <b>389</b> | Potent Anti-metastatic Activity                                             | Inhibition (%) = 22.7 ± 8.8 at 100 (µM)                                                                                    | 46 |
| <b>390</b> | Potent Anti-metastatic Activity                                             | Inhibition (%) = 32.5 ± 5.3 at 100 (µM)                                                                                    | 46 |
| <b>391</b> | Potent Anti-metastatic Activity                                             | Inhibition (%) = 86.8 ± 2.4 at 100 (µM)                                                                                    | 46 |
|            | Inhibitory effects on lung metastasis of B16 melanoma cells in mice         | Inhibition (%) = 94; Dose(mg/kg, po)= 5; Numbers of colonies: 1.2± 0.7                                                     | 46 |
| <b>392</b> | Anti-metastatic Activity                                                    | Inhibition (%) = 86.6 ± 1.54 at 100 (µM)                                                                                   | 46 |
| <b>393</b> | Anti-metastatic Activity                                                    | Inhibition (%) = 28.3 ± 2.10 at 100 (µM)                                                                                   | 46 |
| <b>394</b> | Anti-metastatic Activity                                                    | Inhibition (%) = 15.7 ± 4.60 at 100 (µM)                                                                                   | 46 |
| <b>395</b> | No reported activity                                                        | Structural elucidation only                                                                                                | -  |
| <b>396</b> | Anti-metastatic Activity                                                    | Inhibition (%) = 9.2 ± 10.5 at 10 (µM)                                                                                     | 46 |
| <b>397</b> | Anti-metastatic Activity                                                    | Inhibition (%) = 47.1 ± 4.6 at 100 (µM)                                                                                    | 46 |

**Table S3.** Calculated properties of compiled QAs 1-397

| QA | MW    | <i>d</i> | cLogP  | cLogS  | <i>H-A</i> | <i>H-D</i> |
|----|-------|----------|--------|--------|------------|------------|
| 1  | 280.4 | -4.36    | 0.384  | 0.253  | 5          | 1          |
| 2  | 264.4 | -3.09    | 0.734  | 0.067  | 4          | 0          |
| 3  | 264.4 | 0.99     | 0.884  | -1.652 | 4          | 1          |
| 4  | 264.4 | -0.03    | 1.357  | -1.916 | 4          | 1          |
| 5  | 248.4 | 0.25     | 1.707  | -2.102 | 3          | 0          |
| 6  | 248.4 | 0.25     | 1.707  | -2.102 | 3          | 0          |
| 7  | 246.4 | 1.13     | 1.432  | -1.874 | 3          | 0          |
| 8  | 264.4 | 1.08     | 0.855  | -1.703 | 4          | 1          |
| 9  | 246.4 | 1.13     | 1.432  | -1.874 | 3          | 0          |
| 10 | 242.3 | 2.86     | 1.404  | -1.712 | 3          | 0          |
| 11 | 234.4 | 1.45     | 2.274  | -2.12  | 2          | 0          |
| 12 | 248.4 | 0.25     | 1.707  | -2.102 | 3          | 0          |
| 13 | 248.4 | 0.25     | 1.707  | -2.102 | 3          | 0          |
| 14 | 244.3 | 2.87     | 1.509  | -1.976 | 3          | 0          |
| 15 | 246.4 | 2.34     | 1.432  | -1.874 | 3          | 0          |
| 16 | 246.4 | 0.57     | 1.955  | -2.168 | 3          | 0          |
| 17 | 280.4 | -2.32    | -0.089 | 0.517  | 5          | 1          |
| 18 | 280.4 | 1.52     | -0.118 | 0.466  | 5          | 1          |
| 19 | 280.4 | 5.19     | 0.032  | -1.253 | 5          | 2          |
| 20 | 244.3 | 2.87     | 1.509  | -1.976 | 3          | 0          |
| 21 | 264.4 | 4.73     | 0.855  | -1.703 | 4          | 1          |
| 22 | 417.5 | 1.30     | 2.353  | -4.091 | 6          | 1          |
| 23 | 320.5 | -1.43    | 2.598  | -2.671 | 4          | 0          |
| 24 | 276.4 | 5.31     | 2.431  | -2.532 | 3          | 0          |
| 25 | 244.3 | 0.84     | 1.165  | -2.098 | 3          | 0          |
| 26 | 244.3 | 0.84     | 1.165  | -2.098 | 3          | 0          |
| 27 | 248.4 | 0.25     | 1.707  | -2.102 | 3          | 0          |
| 28 | 246.4 | 0.57     | 1.955  | -2.168 | 3          | 0          |
| 29 | 262.4 | 1.39     | 1.103  | -1.769 | 4          | 1          |

| QA  | MW    | <i>d</i> | cLogP  | cLogS  | <i>H-A</i> | <i>H-D</i> |
|-----|-------|----------|--------|--------|------------|------------|
| 200 | 266.4 | -2.09    | 1.007  | -2.111 | 4          | 2          |
| 201 | 276.4 | -2.03    | 2.291  | -2.455 | 4          | 1          |
| 202 | 292.4 | 0.85     | 1.439  | -2.056 | 5          | 2          |
| 203 | 292.4 | 0.05     | 1.439  | -2.056 | 5          | 2          |
| 204 | 278.4 | 1.41     | -0.044 | -1.586 | 5          | 3          |
| 205 | 319.4 | 0.57     | 2.602  | -2.624 | 5          | 1          |
| 206 | 379.5 | 1.11     | 3.894  | -3.537 | 4          | 0          |
| 207 | 331.4 | -0.53    | 1.846  | -3.479 | 5          | 1          |
| 208 | 391.5 | -0.41    | 1.706  | -3.515 | 7          | 1          |
| 209 | 391.5 | -0.41    | 1.706  | -3.515 | 7          | 1          |
| 210 | 357.4 | -2.45    | 2.176  | -3.849 | 5          | 1          |
| 211 | 387.5 | -2.33    | 2.106  | -3.867 | 6          | 1          |
| 212 | 491.6 | 0.16     | 1.991  | -3.515 | 9          | 3          |
| 213 | 264.4 | -0.59    | 1.433  | -2     | 4          | 0          |
| 214 | 250.4 | 0.55     | 1.999  | -2.018 | 3          | 0          |
| 215 | 379.5 | 1.11     | 3.894  | -3.537 | 4          | 0          |
| 216 | 249.4 | -3.82    | 2.085  | -0.7   | 3          | 0          |
| 217 | 233.4 | 2.21     | 3.059  | -2.869 | 2          | 0          |
| 218 | 233.4 | 2.21     | 3.059  | -2.869 | 2          | 0          |
| 219 | 249.4 | 3.89     | 2.235  | -2.419 | 3          | 1          |
| 220 | 279.4 | 1.21     | 0.720  | -2.42  | 4          | 1          |
| 221 | 288.3 | 1.86     | 1.067  | -1.904 | 5          | 0          |
| 222 | 344.6 | 3.76     | 4.852  | -3.946 | 2          | 0          |
| 223 | 344.6 | 3.76     | 4.852  | -3.946 | 2          | 0          |
| 224 | 343.6 | 2.08     | 4.310  | -3.823 | 2          | 0          |
| 225 | 330.6 | 1.24     | 4.599  | -4.308 | 2          | 1          |
| 226 | 358.6 | 2.31     | 4.538  | -4.397 | 3          | 0          |
| 227 | 372.6 | 2.26     | 4.909  | -4.228 | 3          | 0          |
| 228 | 346.6 | 3.67     | 4.786  | -4.246 | 2          | 0          |

|           |       |       |        |        |   |   |
|-----------|-------|-------|--------|--------|---|---|
| <b>30</b> | 262.4 | 1.96  | 0.580  | -1.475 | 4 | 1 |
| <b>31</b> | 260.3 | 3.68  | 0.657  | -1.577 | 4 | 1 |
| <b>32</b> | 278.4 | 2.42  | -0.244 | -1.025 | 5 | 2 |
| <b>33</b> | 320.4 | 2.32  | 0.241  | -1.435 | 6 | 1 |
| <b>34</b> | 338.5 | 2.22  | 0.574  | -2.396 | 5 | 1 |
| <b>35</b> | 322.4 | 1.39  | 0.517  | -1.663 | 6 | 1 |
| <b>36</b> | 340.5 | 1.30  | 0.849  | -2.624 | 5 | 1 |
| <b>37</b> | 280.4 | -2.71 | -0.118 | 0.466  | 5 | 1 |
| <b>38</b> | 294.4 | 1.39  | 0.460  | -1.381 | 5 | 1 |
| <b>39</b> | 320.4 | 1.66  | 0.764  | -1.729 | 6 | 1 |
| <b>40</b> | 276.3 | 2.06  | -0.071 | -1.138 | 5 | 1 |
| <b>41</b> | 276.3 | 1.94  | -0.071 | -1.138 | 5 | 1 |
| <b>42</b> | 262.4 | 1.88  | 0.609  | -1.424 | 4 | 1 |
| <b>43</b> | 280.4 | 1.54  | 0.032  | -1.253 | 5 | 2 |
| <b>44</b> | 246.4 | 0.57  | 1.955  | -2.168 | 3 | 0 |
| <b>45</b> | 262.4 | 1.25  | 1.132  | -1.718 | 4 | 1 |
| <b>46</b> | 246.4 | 0.57  | 1.955  | -2.168 | 3 | 0 |
| <b>47</b> | 262.4 | 2.54  | 0.580  | -1.475 | 4 | 1 |
| <b>48</b> | 246.4 | 1.13  | 1.432  | -1.874 | 3 | 0 |
| <b>49</b> | 260.3 | 3.49  | 1.098  | -1.659 | 4 | 1 |
| <b>50</b> | 262.4 | 2.54  | 0.580  | -1.475 | 4 | 1 |
| <b>51</b> | 306.4 | 4.68  | 1.340  | -2.113 | 5 | 0 |
| <b>52</b> | 306.4 | 4.68  | 1.340  | -2.113 | 5 | 0 |
| <b>53</b> | 264.4 | 4.73  | 0.855  | -1.703 | 4 | 1 |
| <b>54</b> | 264.4 | 4.73  | 0.855  | -1.703 | 4 | 1 |
| <b>55</b> | 246.4 | 1.39  | 1.784  | -2.204 | 3 | 0 |
| <b>56</b> | 248.4 | 0.55  | 1.707  | -2.102 | 3 | 0 |
| <b>57</b> | 264.4 | 2.45  | 0.855  | -1.703 | 4 | 1 |
| <b>58</b> | 264.4 | 1.22  | 0.884  | -1.652 | 4 | 1 |
| <b>59</b> | 264.4 | -2.92 | 0.734  | 0.067  | 4 | 0 |
| <b>60</b> | 264.4 | 0.58  | 1.357  | -1.916 | 4 | 1 |

|            |       |       |       |        |   |   |
|------------|-------|-------|-------|--------|---|---|
| <b>229</b> | 374.6 | 2.13  | 4.843 | -4.528 | 3 | 0 |
| <b>230</b> | 427.7 | 3.31  | 5.399 | -4.735 | 3 | 1 |
| <b>231</b> | 413.7 | 0.48  | 5.146 | -5.097 | 3 | 2 |
| <b>232</b> | 443.7 | 1.71  | 5.018 | -5.486 | 4 | 1 |
| <b>233</b> | 423.6 | 1.95  | 4.002 | -4.81  | 4 | 0 |
| <b>234</b> | 232.4 | 1.84  | 2.029 | -2.348 | 2 | 1 |
| <b>235</b> | 260.4 | 2.22  | 1.968 | -2.437 | 3 | 0 |
| <b>236</b> | 246.4 | -1.01 | 2.290 | -0.244 | 3 | 0 |
| <b>237</b> | 242.3 | 2.10  | 2.118 | -2.45  | 3 | 0 |
| <b>238</b> | 258.4 | 2.97  | 1.562 | -2.192 | 3 | 0 |
| <b>239</b> | 246.4 | 1.84  | 1.298 | -1.996 | 3 | 0 |
| <b>240</b> | 244.3 | 2.61  | 1.375 | -2.098 | 3 | 0 |
| <b>241</b> | 260.3 | 5.47  | 0.523 | -1.699 | 4 | 1 |
| <b>242</b> | 262.4 | 4.72  | 0.446 | -1.597 | 4 | 1 |
| <b>243</b> | 262.4 | -1.81 | 0.324 | 0.173  | 4 | 0 |
| <b>244</b> | 344.5 | 2.00  | 2.193 | -2.443 | 5 | 0 |
| <b>245</b> | 230.3 | 3.93  | 1.167 | -1.706 | 3 | 0 |
| <b>246</b> | 230.3 | 3.93  | 1.167 | -1.706 | 3 | 0 |
| <b>247</b> | 234.3 | 1.22  | 1.365 | -1.832 | 3 | 0 |
| <b>248</b> | 232.3 | 4.01  | 1.098 | -2.056 | 3 | 0 |
| <b>249</b> | 232.3 | 4.01  | 1.098 | -2.056 | 3 | 0 |
| <b>250</b> | 250.3 | -3.09 | 0.392 | 0.337  | 4 | 0 |
| <b>251</b> | 284.3 | 3.20  | 1.514 | -2.437 | 6 | 1 |
| <b>252</b> | 294.4 | -3.92 | 0.764 | -0.343 | 5 | 1 |
| <b>253</b> | 278.4 | -4.88 | 1.616 | -0.742 | 4 | 0 |
| <b>254</b> | 262.4 | -2.22 | 2.589 | -2.911 | 3 | 0 |
| <b>255</b> | 278.4 | 0.71  | 1.737 | -2.512 | 4 | 1 |
| <b>256</b> | 278.4 | -1.23 | 1.737 | -2.512 | 4 | 1 |
| <b>257</b> | 320.4 | -1.26 | 2.222 | -2.922 | 5 | 0 |
| <b>258</b> | 274.4 | -0.33 | 1.357 | -2.02  | 4 | 1 |
| <b>259</b> | 316.4 | -0.27 | 1.842 | -2.43  | 5 | 0 |

|           |       |       |        |        |   |   |
|-----------|-------|-------|--------|--------|---|---|
| <b>61</b> | 248.4 | 0.55  | 1.707  | -2.102 | 3 | 0 |
| <b>62</b> | 248.4 | 0.55  | 1.707  | -2.102 | 3 | 0 |
| <b>63</b> | 264.4 | 0.50  | 0.855  | -1.703 | 4 | 1 |
| <b>64</b> | 346.5 | -2.18 | 2.603  | -2.549 | 5 | 0 |
| <b>65</b> | 280.4 | 1.36  | 0.473  | -1.335 | 5 | 2 |
| <b>66</b> | 383.5 | -0.01 | 2.106  | -3.359 | 6 | 1 |
| <b>67</b> | 394.5 | -2.06 | 3.113  | -3.653 | 5 | 0 |
| <b>68</b> | 346.5 | -2.18 | 2.603  | -2.549 | 5 | 0 |
| <b>69</b> | 262.4 | 0.90  | 1.141  | -2.084 | 4 | 0 |
| <b>70</b> | 394.5 | -2.06 | 3.113  | -3.653 | 5 | 0 |
| <b>71</b> | 278.4 | 0.19  | 1.283  | -1.831 | 4 | 0 |
| <b>72</b> | 294.4 | 5.47  | 0.431  | -1.432 | 5 | 1 |
| <b>73</b> | 310.4 | 5.65  | -0.421 | -1.033 | 6 | 2 |
| <b>74</b> | 280.4 | 4.67  | 0.003  | -1.304 | 5 | 2 |
| <b>75</b> | 362.5 | 2.61  | 0.967  | -2.328 | 6 | 1 |
| <b>76</b> | 278.4 | 0.51  | 0.791  | -1.898 | 5 | 1 |
| <b>77</b> | 262.4 | 2.31  | 0.759  | -1.891 | 4 | 1 |
| <b>78</b> | 264.4 | 3.12  | 0.855  | -1.703 | 4 | 1 |
| <b>79</b> | 264.4 | 3.12  | 0.855  | -1.703 | 4 | 1 |
| <b>80</b> | 280.4 | 4.67  | 0.003  | -1.304 | 5 | 2 |
| <b>81</b> | 280.4 | 0.55  | 0.003  | -1.304 | 5 | 2 |
| <b>82</b> | 296.4 | 4.72  | -0.849 | -0.905 | 6 | 3 |
| <b>83</b> | 362.5 | 0.53  | 1.676  | -2.042 | 6 | 1 |
| <b>84</b> | 278.4 | 0.19  | 1.283  | -1.831 | 4 | 0 |
| <b>85</b> | 264.4 | 0.74  | 0.855  | -1.703 | 4 | 1 |
| <b>86</b> | 280.4 | 2.88  | 0.003  | -1.304 | 5 | 2 |
| <b>87</b> | 378.5 | 2.48  | 0.899  | -1.751 | 7 | 2 |
| <b>88</b> | 362.5 | 0.62  | 1.751  | -2.15  | 6 | 1 |
| <b>89</b> | 280.4 | 4.67  | 0.003  | -1.304 | 5 | 2 |
| <b>90</b> | 373.5 | 1.35  | 0.708  | -1.932 | 7 | 2 |
| <b>91</b> | 362.5 | -1.94 | 1.751  | -2.15  | 6 | 1 |

|            |       |       |       |        |   |   |
|------------|-------|-------|-------|--------|---|---|
| <b>260</b> | 317.5 | 2.11  | 2.557 | -3.308 | 3 | 2 |
| <b>261</b> | 317.5 | 2.11  | 2.557 | -3.308 | 3 | 2 |
| <b>262</b> | 315.5 | 2.32  | 2.453 | -3.044 | 3 | 2 |
| <b>263</b> | 317.5 | 2.11  | 2.557 | -3.308 | 3 | 2 |
| <b>264</b> | 317.5 | 1.35  | 2.579 | -3.458 | 3 | 2 |
| <b>265</b> | 317.5 | 1.35  | 2.579 | -3.458 | 3 | 2 |
| <b>266</b> | 317.5 | 1.35  | 2.579 | -3.458 | 3 | 2 |
| <b>267</b> | 329.5 | 1.84  | 3.215 | -3.259 | 3 | 0 |
| <b>268</b> | 329.5 | 1.84  | 3.215 | -3.259 | 3 | 0 |
| <b>269</b> | 329.5 | 1.84  | 3.215 | -3.259 | 3 | 0 |
| <b>270</b> | 329.5 | 1.84  | 3.215 | -3.259 | 3 | 0 |
| <b>271</b> | 315.5 | 1.62  | 2.816 | -3.113 | 3 | 1 |
| <b>272</b> | 409.5 | -5.85 | 2.729 | -3.062 | 6 | 1 |
| <b>273</b> | 377.5 | 0.52  | 4.429 | -5.779 | 4 | 0 |
| <b>274</b> | 363.5 | 0.50  | 4.153 | -5.465 | 4 | 1 |
| <b>275</b> | 377.5 | 0.52  | 4.429 | -5.779 | 4 | 0 |
| <b>276</b> | 363.5 | 0.50  | 4.153 | -5.465 | 4 | 1 |
| <b>277</b> | 377.5 | 0.52  | 4.429 | -5.779 | 4 | 0 |
| <b>278</b> | 377.5 | 0.52  | 4.429 | -5.779 | 4 | 0 |
| <b>279</b> | 363.5 | 0.50  | 4.153 | -5.465 | 4 | 1 |
| <b>280</b> | 359.5 | -8.69 | 2.482 | -2.906 | 5 | 2 |
| <b>281</b> | 401.5 | -5.45 | 2.967 | -3.316 | 6 | 1 |
| <b>282</b> | 553.7 | -5.23 | 4.201 | -4.54  | 9 | 1 |
| <b>283</b> | 327.5 | 0.44  | 2.769 | -3.082 | 4 | 1 |
| <b>284</b> | 341.5 | -0.91 | 3.030 | -2.897 | 4 | 0 |
| <b>285</b> | 205.3 | 0.61  | 1.573 | -2.111 | 2 | 0 |
| <b>286</b> | 235.3 | -0.93 | 0.155 | -1.694 | 4 | 1 |
| <b>287</b> | 235.3 | -0.93 | 0.155 | -1.694 | 4 | 1 |
| <b>288</b> | 235.3 | -0.93 | 0.155 | -1.694 | 4 | 1 |
| <b>289</b> | 235.3 | -0.93 | 0.155 | -1.694 | 4 | 1 |
| <b>290</b> | 235.3 | -0.93 | 0.155 | -1.694 | 4 | 1 |

|            |       |       |       |        |   |   |
|------------|-------|-------|-------|--------|---|---|
| <b>92</b>  | 264.4 | 2.83  | 0.855 | -1.703 | 4 | 1 |
| <b>93</b>  | 362.5 | 2.41  | 1.751 | -2.15  | 6 | 1 |
| <b>94</b>  | 244.3 | 1.42  | 1.509 | -1.976 | 3 | 0 |
| <b>95</b>  | 244.3 | 1.42  | 1.509 | -1.976 | 3 | 0 |
| <b>96</b>  | 403.5 | 4.82  | 1.575 | -3.796 | 6 | 2 |
| <b>97</b>  | 304.4 | 3.19  | 0.414 | -1.826 | 5 | 2 |
| <b>98</b>  | 260.3 | 4.34  | 0.657 | -1.577 | 4 | 1 |
| <b>99</b>  | 260.3 | 4.34  | 0.657 | -1.577 | 4 | 1 |
| <b>100</b> | 327.4 | -1.54 | 1.689 | -1.62  | 5 | 0 |
| <b>101</b> | 302.4 | 4.29  | 1.141 | -1.987 | 5 | 0 |
| <b>102</b> | 316.4 | -4.33 | 1.440 | -2.227 | 5 | 0 |
| <b>103</b> | 318.4 | 2.23  | 0.133 | -1.558 | 6 | 1 |
| <b>104</b> | 258.3 | 3.73  | 0.381 | -1.349 | 4 | 1 |
| <b>105</b> | 258.3 | 3.95  | 0.359 | -1.659 | 4 | 0 |
| <b>106</b> | 258.3 | 1.75  | 0.943 | -1.958 | 4 | 0 |
| <b>107</b> | 260.3 | 3.50  | 0.657 | -1.577 | 4 | 1 |
| <b>108</b> | 260.3 | -2.25 | 0.536 | 0.193  | 4 | 0 |
| <b>109</b> | 258.3 | 3.96  | 0.801 | -1.628 | 4 | 0 |
| <b>110</b> | 234.4 | 1.45  | 2.274 | -2.12  | 2 | 0 |
| <b>111</b> | 234.4 | 1.45  | 2.274 | -2.12  | 2 | 0 |
| <b>112</b> | 234.4 | 1.45  | 2.274 | -2.12  | 2 | 0 |
| <b>113</b> | 234.4 | 1.45  | 2.274 | -2.12  | 2 | 0 |
| <b>114</b> | 232.4 | 0.72  | 2.351 | -2.222 | 2 | 0 |
| <b>115</b> | 308.5 | 0.72  | 3.970 | -3.43  | 2 | 0 |
| <b>116</b> | 308.5 | 0.72  | 3.970 | -3.43  | 2 | 0 |
| <b>117</b> | 273.4 | -4.01 | 2.142 | -2.755 | 3 | 0 |
| <b>118</b> | 262.4 | 2.33  | 2.923 | -2.876 | 2 | 0 |
| <b>119</b> | 262.4 | 3.59  | 2.032 | -2.48  | 3 | 0 |
| <b>120</b> | 373.5 | 2.69  | 1.996 | -2.508 | 5 | 1 |
| <b>121</b> | 246.4 | 2.14  | 1.784 | -2.204 | 3 | 0 |
| <b>122</b> | 248.4 | 2.80  | 1.707 | -2.102 | 3 | 0 |

|            |       |       |        |        |   |   |
|------------|-------|-------|--------|--------|---|---|
| <b>291</b> | 235.3 | -0.93 | 0.155  | -1.694 | 4 | 1 |
| <b>292</b> | 235.3 | -0.93 | 0.155  | -1.694 | 4 | 1 |
| <b>293</b> | 235.3 | -0.93 | 0.155  | -1.694 | 4 | 1 |
| <b>294</b> | 251.4 | 1.51  | 1.989  | -2.579 | 3 | 1 |
| <b>295</b> | 251.4 | 1.51  | 1.989  | -2.579 | 3 | 1 |
| <b>296</b> | 336.5 | 3.47  | 2.364  | -2.462 | 4 | 1 |
| <b>297</b> | 336.5 | 3.47  | 2.364  | -2.462 | 4 | 1 |
| <b>298</b> | 260.3 | -2.68 | 1.898  | -2.637 | 4 | 1 |
| <b>299</b> | 262.4 | -0.68 | 1.865  | -2.456 | 4 | 1 |
| <b>300</b> | 262.4 | -0.46 | 1.800  | -2.292 | 4 | 1 |
| <b>301</b> | 327.5 | 0.22  | 3.422  | -3.223 | 4 | 0 |
| <b>302</b> | 294.4 | 1.63  | -0.199 | -1.202 | 6 | 1 |
| <b>303</b> | 294.4 | 2.10  | -0.199 | -1.202 | 6 | 1 |
| <b>304</b> | 234.3 | 3.56  | 1.365  | -1.832 | 3 | 0 |
| <b>305</b> | 439.5 | -0.20 | 3.082  | -4.185 | 7 | 3 |
| <b>306</b> | 439.5 | -0.20 | 3.082  | -4.185 | 7 | 3 |
| <b>307</b> | 439.5 | -0.20 | 3.082  | -4.185 | 7 | 3 |
| <b>308</b> | 437.5 | 0.68  | 3.177  | -4.469 | 7 | 3 |
| <b>309</b> | 437.5 | -7.66 | 3.056  | -2.699 | 7 | 2 |
| <b>310</b> | 451.5 | -7.66 | 3.331  | -3.013 | 7 | 1 |
| <b>311</b> | 439.5 | -0.20 | 3.082  | -4.185 | 7 | 3 |
| <b>312</b> | 439.5 | -0.20 | 3.082  | -4.185 | 7 | 3 |
| <b>313</b> | 439.5 | -0.20 | 3.082  | -4.185 | 7 | 3 |
| <b>314</b> | 453.5 | -1.00 | 3.510  | -4.313 | 7 | 2 |
| <b>315</b> | 439.5 | -8.23 | 3.179  | -2.564 | 7 | 2 |
| <b>316</b> | 453.5 | -8.23 | 3.455  | -2.878 | 7 | 1 |
| <b>317</b> | 453.5 | -8.23 | 3.455  | -2.878 | 7 | 1 |
| <b>318</b> | 451.5 | 0.68  | 3.453  | -4.783 | 7 | 2 |
| <b>319</b> | 435.5 | -1.81 | 4.305  | -5.182 | 6 | 1 |
| <b>320</b> | 421.5 | -1.81 | 4.029  | -4.868 | 6 | 2 |
| <b>321</b> | 453.5 | -0.20 | 3.358  | -4.499 | 7 | 2 |

|            |       |       |        |        |   |   |
|------------|-------|-------|--------|--------|---|---|
| <b>123</b> | 246.4 | 2.14  | 1.784  | -2.204 | 3 | 0 |
| <b>124</b> | 246.4 | 1.49  | 1.440  | -2.326 | 3 | 0 |
| <b>125</b> | 264.4 | 3.39  | 0.884  | -1.652 | 4 | 1 |
| <b>126</b> | 264.4 | 3.19  | 0.855  | -1.703 | 4 | 1 |
| <b>127</b> | 264.4 | 1.33  | 1.672  | -1.991 | 3 | 1 |
| <b>128</b> | 250.4 | 2.15  | 1.422  | -1.721 | 3 | 1 |
| <b>129</b> | 264.4 | 2.87  | 1.357  | -1.916 | 4 | 1 |
| <b>130</b> | 262.4 | 4.14  | 0.932  | -1.805 | 4 | 1 |
| <b>131</b> | 220.3 | 0.43  | -0.336 | 1.227  | 4 | 0 |
| <b>132</b> | 190.2 | 3.16  | 0.384  | -1.304 | 3 | 1 |
| <b>133</b> | 204.3 | 5.06  | 0.637  | -0.942 | 3 | 0 |
| <b>134</b> | 246.4 | 1.89  | 1.952  | -1.782 | 3 | 0 |
| <b>135</b> | 244.3 | 0.86  | 1.767  | -1.721 | 3 | 0 |
| <b>136</b> | 262.3 | -3.10 | 1.303  | -1.839 | 5 | 0 |
| <b>137</b> | 230.3 | 0.92  | 1.432  | -2.161 | 3 | 1 |
| <b>138</b> | 220.3 | 3.29  | 0.136  | -1.264 | 4 | 1 |
| <b>139</b> | 218.3 | 2.64  | 0.323  | -1.393 | 4 | 0 |
| <b>140</b> | 220.3 | 5.57  | -0.186 | -0.492 | 4 | 1 |
| <b>141</b> | 248.3 | -0.29 | -0.016 | -1.368 | 5 | 0 |
| <b>142</b> | 248.3 | -2.45 | -1.159 | -0.717 | 5 | 1 |
| <b>143</b> | 247.3 | 4.39  | -0.631 | -0.793 | 5 | 1 |
| <b>144</b> | 206.2 | 3.07  | -0.276 | -1.082 | 4 | 1 |
| <b>145</b> | 276.3 | 2.55  | -0.123 | -1.035 | 5 | 1 |
| <b>146</b> | 276.3 | 2.55  | -0.123 | -1.035 | 5 | 1 |
| <b>147</b> | 248.3 | -0.04 | 0.897  | -1.539 | 5 | 0 |
| <b>148</b> | 246.3 | 4.32  | 0.932  | -1.494 | 4 | 0 |
| <b>149</b> | 262.3 | 2.28  | 0.005  | -0.987 | 5 | 1 |
| <b>150</b> | 345.4 | 4.93  | 1.143  | -1.469 | 6 | 0 |
| <b>151</b> | 272.3 | 3.40  | 0.198  | -1.441 | 5 | 0 |
| <b>152</b> | 297.4 | 3.21  | 0.588  | -1.9   | 5 | 1 |
| <b>153</b> | 347.4 | 3.99  | 1.637  | -3.083 | 5 | 1 |

|            |       |       |       |        |   |   |
|------------|-------|-------|-------|--------|---|---|
| <b>322</b> | 435.5 | -1.81 | 4.305 | -5.182 | 6 | 1 |
| <b>323</b> | 453.5 | -0.20 | 3.358 | -4.499 | 7 | 2 |
| <b>324</b> | 421.5 | -1.81 | 4.029 | -4.868 | 6 | 2 |
| <b>325</b> | 421.5 | -1.81 | 4.029 | -4.868 | 6 | 2 |
| <b>326</b> | 439.5 | -0.20 | 3.164 | -4.692 | 7 | 2 |
| <b>327</b> | 439.5 | -0.20 | 3.164 | -4.692 | 7 | 2 |
| <b>328</b> | 439.5 | -0.20 | 3.164 | -4.692 | 7 | 2 |
| <b>329</b> | 439.5 | -8.23 | 3.261 | -3.071 | 7 | 1 |
| <b>330</b> | 437.5 | -2.23 | 4.510 | -5.554 | 6 | 0 |
| <b>331</b> | 423.5 | -2.20 | 4.234 | -5.24  | 6 | 1 |
| <b>332</b> | 437.5 | -2.23 | 4.510 | -5.554 | 6 | 0 |
| <b>333</b> | 462.7 | -1.70 | 6.276 | -4.67  | 5 | 1 |
| <b>334</b> | 446.7 | -2.23 | 7.100 | -5.12  | 4 | 0 |
| <b>335</b> | 478.7 | -1.70 | 5.453 | -4.22  | 6 | 2 |
| <b>336</b> | 446.7 | -2.23 | 7.100 | -5.12  | 4 | 0 |
| <b>337</b> | 446.7 | -2.23 | 7.100 | -5.12  | 4 | 0 |
| <b>338</b> | 446.7 | -2.23 | 7.100 | -5.12  | 4 | 0 |
| <b>339</b> | 460.7 | -1.15 | 7.369 | -5.28  | 4 | 0 |
| <b>340</b> | 460.7 | -1.15 | 7.369 | -5.28  | 4 | 0 |
| <b>341</b> | 474.8 | -1.15 | 7.638 | -5.44  | 4 | 0 |
| <b>342</b> | 474.8 | -1.15 | 7.638 | -5.44  | 4 | 0 |
| <b>343</b> | 478.7 | -4.31 | 5.303 | -2.501 | 6 | 1 |
| <b>344</b> | 494.7 | -4.23 | 4.480 | -2.051 | 7 | 2 |
| <b>345</b> | 446.7 | -2.23 | 7.100 | -5.12  | 4 | 0 |
| <b>346</b> | 506.8 | -0.64 | 5.992 | -4.54  | 6 | 2 |
| <b>347</b> | 490.8 | -0.64 | 6.815 | -4.99  | 5 | 1 |
| <b>348</b> | 492.7 | -0.64 | 5.722 | -4.38  | 6 | 2 |
| <b>349</b> | 478.7 | -1.70 | 5.453 | -4.22  | 6 | 2 |
| <b>350</b> | 492.7 | -0.64 | 5.722 | -4.38  | 6 | 2 |
| <b>351</b> | 446.7 | -2.23 | 7.100 | -5.12  | 4 | 0 |
| <b>352</b> | 476.7 | -0.64 | 6.546 | -4.83  | 5 | 1 |

|            |       |       |        |        |   |   |
|------------|-------|-------|--------|--------|---|---|
| <b>154</b> | 368.4 | -0.86 | -2.338 | -0.658 | 9 | 4 |
| <b>155</b> | 288.3 | 1.73  | 0.788  | -1.686 | 5 | 0 |
| <b>156</b> | 192.2 | 4.79  | -0.402 | -1.183 | 4 | 2 |
| <b>157</b> | 208.3 | 1.69  | 0.836  | -1.068 | 3 | 0 |
| <b>158</b> | 194.3 | -0.35 | 0.583  | -1.43  | 3 | 1 |
| <b>159</b> | 371.5 | -0.62 | 2.458  | -2.712 | 5 | 0 |
| <b>160</b> | 248.4 | -2.60 | 1.965  | -1.847 | 3 | 0 |
| <b>161</b> | 234.3 | -2.95 | 1.631  | -2.287 | 3 | 1 |
| <b>162</b> | 194.3 | 3.35  | 1.402  | -1.086 | 2 | 0 |
| <b>163</b> | 222.3 | -0.81 | 0.522  | -1.519 | 4 | 0 |
| <b>164</b> | 208.3 | 1.69  | 0.836  | -1.068 | 3 | 0 |
| <b>165</b> | 296.4 | -0.78 | -0.541 | -2.071 | 5 | 2 |
| <b>166</b> | 220.4 | -1.06 | 2.197  | -2.305 | 2 | 1 |
| <b>167</b> | 230.3 | 2.07  | 1.298  | -2.283 | 3 | 1 |
| <b>168</b> | 232.3 | 1.26  | 1.221  | -2.181 | 3 | 1 |
| <b>169</b> | 246.4 | 1.62  | 1.556  | -1.741 | 3 | 0 |
| <b>170</b> | 194.3 | 2.62  | 0.583  | -1.43  | 3 | 1 |
| <b>171</b> | 248.4 | 0.11  | 1.965  | -1.847 | 3 | 0 |
| <b>172</b> | 246.4 | 2.88  | 1.474  | -1.819 | 3 | 0 |
| <b>173</b> | 248.4 | -1.35 | 1.884  | -1.925 | 3 | 0 |
| <b>174</b> | 169.3 | -2.45 | 1.212  | -1.45  | 2 | 1 |
| <b>175</b> | 169.3 | -2.45 | 1.212  | -1.45  | 2 | 1 |
| <b>176</b> | 208.3 | 1.78  | 1.135  | -1.912 | 3 | 1 |
| <b>177</b> | 185.3 | 0.83  | 0.360  | -1.051 | 3 | 2 |
| <b>178</b> | 183.3 | 2.70  | 1.640  | -1.885 | 2 | 1 |
| <b>179</b> | 167.3 | 1.63  | 2.463  | -2.335 | 1 | 0 |
| <b>180</b> | 250.4 | 1.11  | 3.010  | -3.124 | 2 | 1 |
| <b>181</b> | 266.4 | -3.24 | 2.036  | -0.955 | 3 | 1 |
| <b>182</b> | 166.3 | -4.14 | 1.920  | -2.212 | 1 | 0 |
| <b>183</b> | 224.4 | -7.09 | 2.132  | -2.731 | 2 | 1 |
| <b>184</b> | 167.3 | 1.45  | 1.485  | -1.827 | 2 | 0 |

|            |       |       |       |        |    |   |
|------------|-------|-------|-------|--------|----|---|
| <b>353</b> | 446.7 | -2.23 | 7.100 | -5.12  | 4  | 0 |
| <b>354</b> | 462.7 | -1.70 | 6.276 | -4.67  | 5  | 1 |
| <b>355</b> | 478.7 | -1.70 | 5.453 | -4.22  | 6  | 2 |
| <b>356</b> | 494.7 | -4.23 | 4.480 | -2.051 | 7  | 2 |
| <b>357</b> | 510.7 | -7.65 | 3.506 | 0.118  | 8  | 2 |
| <b>358</b> | 460.7 | -1.15 | 7.369 | -5.28  | 4  | 0 |
| <b>359</b> | 476.7 | -0.64 | 6.546 | -4.83  | 5  | 1 |
| <b>360</b> | 462.7 | -0.85 | 6.248 | -4.721 | 5  | 1 |
| <b>361</b> | 462.7 | -1.70 | 6.276 | -4.67  | 5  | 1 |
| <b>362</b> | 474.8 | -1.15 | 7.638 | -5.44  | 4  | 0 |
| <b>363</b> | 474.8 | -1.15 | 7.638 | -5.44  | 4  | 0 |
| <b>364</b> | 470.7 | -0.68 | 6.527 | -5.12  | 4  | 0 |
| <b>365</b> | 470.7 | -0.68 | 6.527 | -5.12  | 4  | 0 |
| <b>366</b> | 470.7 | -0.68 | 6.527 | -5.12  | 4  | 0 |
| <b>367</b> | 470.7 | -0.68 | 6.527 | -5.12  | 4  | 0 |
| <b>368</b> | 470.7 | -0.68 | 6.527 | -5.12  | 4  | 0 |
| <b>369</b> | 470.7 | -0.68 | 6.527 | -5.12  | 4  | 0 |
| <b>370</b> | 514.6 | 1.93  | 1.307 | -3.003 | 8  | 0 |
| <b>371</b> | 502.6 | 4.07  | 1.112 | -2.238 | 8  | 1 |
| <b>372</b> | 516.6 | 2.72  | 1.566 | -2.508 | 8  | 1 |
| <b>373</b> | 518.6 | 3.25  | 1.196 | -2.466 | 9  | 0 |
| <b>374</b> | 530.6 | 2.22  | 1.399 | -2.508 | 9  | 0 |
| <b>375</b> | 504.6 | 3.25  | 0.742 | -2.196 | 9  | 0 |
| <b>376</b> | 534.6 | 0.65  | 0.899 | -2.177 | 10 | 0 |
| <b>377</b> | 533.7 | -4.19 | 1.481 | -3.916 | 8  | 0 |
| <b>378</b> | 533.7 | -4.19 | 1.481 | -3.916 | 8  | 0 |
| <b>379</b> | 492.7 | 0.08  | 2.935 | -3.946 | 6  | 0 |
| <b>380</b> | 492.7 | 0.08  | 2.935 | -3.946 | 6  | 0 |
| <b>381</b> | 496.7 | 0.47  | 3.612 | -4.166 | 6  | 1 |
| <b>382</b> | 490.7 | 4.78  | 2.949 | -3.378 | 6  | 0 |
| <b>383</b> | 490.7 | 2.06  | 2.652 | -3.266 | 6  | 0 |



|            |       |        |       |        |   |   |
|------------|-------|--------|-------|--------|---|---|
| <b>185</b> | 167.3 | 1.45   | 1.485 | -1.827 | 2 | 0 |
| <b>186</b> | 196.3 | 0.39   | 1.027 | -1.672 | 3 | 1 |
| <b>187</b> | 347.5 | -16.13 | 5.736 | -4.538 | 3 | 0 |
| <b>188</b> | 305.5 | -15.64 | 5.252 | -4.128 | 2 | 1 |
| <b>189</b> | 319.5 | -8.45  | 4.827 | -3.998 | 3 | 0 |
| <b>191</b> | 235.4 | -2.78  | 3.213 | -2.416 | 2 | 1 |
| <b>192</b> | 217.4 | -0.54  | 3.195 | -3.241 | 1 | 0 |
| <b>193</b> | 195.3 | -2.09  | 3.427 | -3.093 | 1 | 0 |
| <b>194</b> | 207.4 | -2.13  | 3.641 | -3.084 | 1 | 0 |
| <b>195</b> | 231.4 | -0.75  | 3.649 | -3.511 | 1 | 0 |
| <b>196</b> | 231.4 | -0.75  | 3.649 | -3.511 | 1 | 0 |
| <b>197</b> | 235.4 | -8.60  | 4.550 | -3.624 | 1 | 0 |
| <b>198</b> | 280.5 | -1.86  | 4.029 | -2.808 | 2 | 0 |
| <b>199</b> | 262.4 | -1.54  | 0.808 | -1.985 | 4 | 2 |

|            |       |      |       |        |   |   |
|------------|-------|------|-------|--------|---|---|
| <b>384</b> | 490.7 | 3.05 | 2.291 | -3.127 | 6 | 0 |
| <b>385</b> | 508.7 | 1.54 | 1.593 | -1.186 | 7 | 0 |
| <b>386</b> | 492.7 | 4.12 | 2.566 | -3.355 | 6 | 0 |
| <b>387</b> | 393.6 | 0.47 | 3.655 | -4.487 | 4 | 1 |
| <b>388</b> | 393.6 | 0.47 | 3.655 | -4.487 | 4 | 1 |
| <b>389</b> | 494.7 | 3.32 | 5.724 | -5.302 | 4 | 0 |
| <b>390</b> | 510.7 | 1.32 | 4.384 | -4.219 | 5 | 0 |
| <b>391</b> | 510.7 | 3.72 | 5.373 | -5.116 | 5 | 1 |
| <b>392</b> | 526.7 | 2.46 | 5.023 | -4.93  | 6 | 2 |
| <b>393</b> | 494.7 | 3.32 | 5.724 | -5.302 | 4 | 0 |
| <b>394</b> | 510.7 | 1.32 | 4.384 | -4.219 | 5 | 0 |
| <b>395</b> | 494.7 | 3.32 | 5.724 | -5.302 | 4 | 0 |
| <b>396</b> | 510.7 | 1.32 | 4.384 | -4.219 | 5 | 0 |
| <b>397</b> | 510.7 | 3.72 | 5.373 | -5.116 | 5 | 1 |

MW = molecular weight; d = druglikeness score; cLogP = logarithmic partition coefficient between *n*-octanol and water, i.e.,  $\text{Log}(C_{n\text{-octanol}}/C_{\text{water}})$ ; cLogS = logarithmic water solubility (M); H-A = hydrogen acceptors; H-D = hydrogen donors.

## References

- (1) Luo, D.; Chen, N. H.; Wang, W. Z.; Zhang, J. H.; Li, C. J.; Zhuo, X. F.; Tu, Z. C.; Wu, Z. N.; Fan, C. L.; Zhang, H. P.; Li, Y. L.; Wang, G. C.; Zhang, Y. B. Structurally Diverse Matrine-Based Alkaloids with Anti-Inflammatory Effects from *Sophora alopecuroides*. *Chinese J. Chem.* **2021**, *39* (12), 3339–3346. <https://doi.org/10.1002/cjoc.202100526>.
- (2) Wang, Y. P.; Zhao, W.; Xue, R.; Zhou, Z. X.; Liu, F.; Han, Y. X.; Ren, G.; Peng, Z. G.; Cen, S.; Chen, H. S.; Li, Y. H.; Jiang, J. D. Oxymatrine Inhibits Hepatitis B Infection with an Advantage of Overcoming Drug-Resistance. *Antiviral Res.* **2011**, *89* (3), 227–231. <https://doi.org/10.1016/j.antiviral.2011.01.005>.
- (3) Liu, G.; Wang, J.; Deng, X. H.; Ma, P. S.; Li, F. M.; Peng, X. D.; Niu, Y.; Sun, T.; Li, Y. X.; Yu, J. Q. The Anticonvulsant and Neuroprotective Effects of Oxysophocarpine on Pilocarpine-Induced Convulsions in Adult Male Mice. *Cell. Mol. Neurobiol.* **2017**, *37* (2), 339–349. <https://doi.org/10.1007/s10571-016-0411-y>.
- (4) Pan, Q. M.; Li, Y. H.; Hua, J.; Huang, F. P.; Wang, H. S.; Liang, D. Antiviral Matrine-Type Alkaloids from the Rhizomes of *Sophora tonkinensis*. *J. Nat. Prod.* **2015**, *78* (7), 1683–1688. <https://doi.org/10.1021/acs.jnatprod.5b00325>.
- (5) Ding, P. L.; Huang, H.; Zhou, P.; Chen, D. F. Quinolizidine Alkaloids with Anti-HBV Activity from *Sophora tonkinensis*. *Planta Med.* **2006**, *72* (9), 854–856. <https://doi.org/10.1055/s-2006-946639>.
- (6) Lei, W.; Xing-De, W.; Juan, H.; Gen-Tao, L.; Li-Yan, P.; Yan, L.; Liu-Dong, S.; Qin-Shi, Z. A New Quinolizidine Alkaloid from *Sophora flavescens*. *Chem. Nat. Compd.* **2014**, *50* (5), 876–879. <https://doi.org/10.1007/s10600-014-1104-8>.
- (7) Xu, Z.; Zhang, F.; Bai, C.; Yao, C.; Zhong, H.; Zou, C.; Chen, X. Sophoridine Induces Apoptosis and S Phase Arrest via ROS-Dependent JNK and ERK Activation in Human Pancreatic Cancer Cells. *J. Exp. Clin. Cancer Res.* **2017**, *36* (1), 1–10. <https://doi.org/10.1186/s13046-017-0590-5>.
- (8) Zhang, B. H.; Wang, N. S.; Li, X. J.; Kong, X. J.; Cai, Y. L. Anti-Arrhythmic Effects of Matrine. *Acta Pharmacol. Sin.* **1990**, *11* (3), 253–257.
- (9) Zhang, Y.; Zhang, H.; Yu, P.; Liu, Q.; Liu, K.; Duan, H.; Luan, G.; Yagasaki, K.; Zhang, G. Effects of Matrine against the Growth of Human Lung Cancer and Hepatoma Cells as Well as Lung Cancer Cell Migration. *Cytotechnology* **2009**, *59* (3), 191–200. <https://doi.org/10.1007/s10616-009-9211-2>.
- (10) Zhang, Y. B.; Yang, L.; Luo, D.; Chen, N. H.; Wu, Z. N.; Ye, W. C.; Li, Y. L.; Wang, G. C. Sophalines E-I, Five Quinolizidine-Based Alkaloids with Antiviral Activities against the Hepatitis B Virus from the Seeds of *Sophora alopecuroides*. *Org. Lett.* **2018**, *20* (18), 5942–5946. <https://doi.org/10.1021/acs.orglett.8b02637>.
- (11) Fan, C. L.; Zhang, Y. B.; Chen, Y.; Xie, P.; Wang, G. C.; Tian, H. Y.; Li, Y. L.; Huang, X. J.; Zhang, X. Q.; Li, Z. Y.; Liu, J. S.; Ye, W. C.; Chen, W. M. Alopecuroides A-E, Matrine-Type Alkaloid Dimers from the Aerial Parts of *Sophora alopecuroides*. *J. Nat. Prod.* **2019**, *82* (12), 3227–3232. <https://doi.org/10.1021/acs.jnatprod.8b01081>.
- (12) Zanardi, O. Z.; Ribeiro, L. do P.; Ansante, T. F.; Santos, M. S.; Bordini, G. P.; Yamamoto, P. T.; Vendramim, J. D. Bioactivity of a

Matrine-Based Biopesticide against Four Pest Species of Agricultural Importance. *Crop Prot.* **2015**, *67*, 160–167.  
<https://doi.org/10.1016/j.cropro.2014.10.010>.

- (13) Liu, Y.; Xu, Y.; Ji, W.; Li, X.; Sun, B.; Gao, Q.; Su, C. Anti-Tumor Activities of Matrine and Oxymatrine: Literature Review. *Tumor Biol.* **2014**, *35* (6), 5111–5119. <https://doi.org/10.1007/s13277-014-1680-z>.
- (14) Yang, Y.; Xiu, J.; Zhang, X.; Zhang, L.; Yan, K.; Qin, C.; Liu, J. Antiviral Effect of Matrine against Human Enterovirus 71. *Molecules* **2012**, *17* (9), 10370–10376. <https://doi.org/10.3390/molecules170910370>.
- (15) Qavi, H. B.; Wyde, P. R.; Khan, M. A. In Vitro Inhibition of HHV-6 Replication by Sophocarpienes. *Phyther. Res.* **2002**, *16* (2), 154–156. <https://doi.org/10.1002/ptr.949>.
- (16) Zhang, Y. B.; Luo, D.; Yang, L.; Cheng, W.; He, L. J.; Kuang, G. K.; Li, M. M.; Li, Y. L.; Wang, G. C. Matrine-Type Alkaloids from the Roots of *Sophora flavescens* and Their Antiviral Activities against the Hepatitis B Virus. *J. Nat. Prod.* **2018**, *81* (10), 2259–2265. <https://doi.org/10.1021/acs.jnatprod.8b00576>.
- (17) Ding, P. L.; Liao, Z. X.; Huang, H.; Zhou, P.; Chen, D. F. (+)-12 $\alpha$ -Hydroxysophocarpine, a New Quinolizidine Alkaloid and Related Anti-HBV Alkaloids from *Sophora flavescens*. *Bioorganic Med. Chem. Lett.* **2006**, *16* (5), 1231–1235. <https://doi.org/10.1016/j.bmcl.2005.11.073>.
- (18) Roufosse, F.; Kahn, J.; Rothenberg, M. E.; Wardlaw, A. J.; Klion, A. D.; Kirby, S. Y.; Martyn, J.; Bentley, J. H.; Bradford, E. S.; Yancey, S. W.; Steinfeld, J.; Gleich, G. J. Quinolizidine Alkaloids from *Sophora tonkinensis* and Their Anti-Inflammatory Activities. *J. Allergy Clin. Immunol.* **2020**, *2* (1), 102592.
- (19) Tan, C. J.; Liu, L. N.; Zhao, B. Y. A New Quinolizidine Alkaloid from *Oxytropis ochrocephala*. *Chem. Nat. Compd.* **2017**, *53* (2), 322–324. <https://doi.org/10.1007/s10600-017-1979-2>.
- (20) Tan, C. J.; Yi, P.; Goto, M.; Morris-Natschke, S. L.; Liu, L. N.; Lee, K. H.; Zhao, B. Y. (+)-(14 $\beta$ )-14-Ethylmatridin-15-One, a New Quinolizidine Alkaloid from the Poisonous Plant *Oxytropis ochrocephala* Bunge. *Helv. Chim. Acta* **2016**, *99* (3), 225–227. <https://doi.org/10.1002/hlca.201500239>.
- (21) Zou, J.; Zhao, L.; Yi, P.; An, Q.; He, L.; Li, Y.; Lou, H.; Yuan, C.; Gu, W.; Huang, L.; Hu, Z.; Hao, X. Quinolizidine Alkaloids with Antiviral and Insecticidal Activities from the Seeds of *Sophora tonkinensis* Gagnep. *J. Agric. Food Chem.* **2020**, *68* (50), 15015–15026. <https://doi.org/10.1021/acs.jafc.0c06032>.
- (22) Rong, Z. J.; Gao, X. X.; Hu, G. S.; Yan, T.; Jia, J. M.; Wang, A. H. A Novel Alkaloid from the Seeds of *Sophora alopecuroides* L. *Nat. Prod. Res.* **2022**, *36* (7), 1864–1869. <https://doi.org/10.1080/14786419.2020.1824226>.
- (23) Li, J. C.; Zhang, Z. J.; Liu, D.; Jiang, M. Y.; Li, R. T.; Li, H. M. Quinolizidine Alkaloids from the Roots of *Sophora flavescens*. *Nat. Prod. Res.* **2020**, *0* (0), 1–8. <https://doi.org/10.1080/14786419.2020.1817011>.
- (24) Cely-Veloza, W.; Yamaguchi, L.; Quiroga, D.; Kato, M. J.; Coy-Barrera, E. Antifungal Activity against *Fusarium oxysporum* of Quinolizidines Isolated from Three Controlled-Growth *Genisteeae* Plants: Structure–Activity Relationship Implications. *Nat. Products*

*Bioprospect.* **2023**, *13* (1), 9. <https://doi.org/10.1007/s13659-023-00373-4>.

- (25) Zhang, S.-Y.; Li, W.; Nie, H.; Liao, M.; Qiu, B.; Yang, Y.-L.; Chen, Y.-F. Five New Alkaloids from the Roots of *Sophora flavescens*. *Chem. Biodivers.* **2018**, *15* (3), e1700577. <https://doi.org/10.1002/cbdv.201700577>.
- (26) Korir, E.; Kiplimo, J. J.; Crouch, N. R.; Moodley, N.; Koorbanally, N. A. Quinolizidine Alkaloids from *Sophora velutina* Subsp. *Zimbabweensis* (Fabaceae: Sophoreae). *Nat. Prod. Commun.* **2012**, *7* (8), 999–1003. <https://doi.org/10.1177/1934578x1200700810>.
- (27) Neto, A. T.; Oliveira, C. Q.; Ilha, V.; Pedroso, M.; Burrow, R. A.; Dalcol, I. I.; Morel, A. F. Quinolizidine Alkaloids from *Lupinus lanatus*. *J. Mol. Struct.* **2011**, *1004* (1–3), 174–177. <https://doi.org/10.1016/j.molstruc.2011.07.061>.
- (28) Aly, S. H.; Elissawy, A. M.; Allam, A. E.; Farag, S. M.; Eldahshan, O. A.; Elshanawany, M. A.; Singab, A. N. B. New Quinolizidine Alkaloid and Insecticidal Activity of *Sophora secundiflora* and *Sophora tomentosa* against *Culex pipiens* (Diptera: Culicidae). *Nat. Prod. Res.* **2021**, *0* (0), 1–13. <https://doi.org/10.1080/14786419.2021.1919108>.
- (29) Hu, Z. X.; Zhang, P.; Zou, J. Bin; An, Q.; Yi, P.; Yuan, C. M.; Zhang, Z. K.; Zhao, L. H.; Hao, X. J. Quinolizidine Alkaloids with Antitomato Spotted Wilt Virus and Insecticidal Activities from the Seeds of *Thermopsis lanceolata* R. Br. *J. Agric. Food Chem.* **2022**, *70* (29), 9214–9226. <https://doi.org/10.1021/acs.jafc.2c02546>.
- (30) Orhan, I.; Naz, Q.; Kartal, M.; Tosun, F.; Şener, B.; Choudhary, M. I. *In Vitro* Anticholinesterase Activity of Various Alkaloids. *Zeitschrift für Naturforsch. - Sect. C J. Biosci.* **2007**, *62* (9–10), 684–688. <https://doi.org/10.1515/znc-2007-9-1010>.
- (31) Villalpando-Vargas, F.; Medina-Ceja, L. Sparteine as an Anticonvulsant Drug: Evidence and Possible Mechanism of Action. *Seizure* **2016**, *39* (1), 49–55. <https://doi.org/10.1016/j.seizure.2016.05.010>.
- (32) Li, J. C.; Dai, W. F.; Liu, D.; Zhang, Z. J.; Jiang, M. Y.; Rao, K. R.; Li, R. T.; Li, H. M. Quinolizidine Alkaloids from *Sophora alopecuroides* with Anti-Inflammatory and Anti-Tumor Properties. *Bioorg. Chem.* **2021**, *110* (January), 104781. <https://doi.org/10.1016/j.bioorg.2021.104781>.
- (33) Pan, Q. M.; Zhang, G. J.; Huang, R. Z.; Pan, Y. M.; Wang, H. S.; Liang, D. Cytisine-Type Alkaloids and Flavonoids from the Rhizomes of *Sophora tonkinensis*. *J. Asian Nat. Prod. Res.* **2016**, *18* (5), 429–435. <https://doi.org/10.1080/10286020.2015.1131680>.
- (34) Zhang, P.; An, Q.; Yi, P.; Cui, Y.; Zou, J. Bin; Yuan, C. M.; Zhang, Y.; Gu, W.; Huang, L. J.; Zhao, L. H.; Hu, Z. X.; Hao, X. J. Thermolansedlines A–G, Seven Thermopsine-Based Alkaloids with Antiviral and Insecticidal Activities from the Seeds of *Thermopsis lanceolata* R. Br. *Fitoterapia* **2022**, *158* (February), 105140. <https://doi.org/10.1016/j.fitote.2022.105140>.
- (35) Aaron, P. A.; Vu, K.; Gelli, A. An Antivirulence Approach for Preventing *Cryptococcus neoformans* from Crossing the Blood-Brain Barrier via Novel Natural Product Inhibitors of a Fungal Metalloprotease. *MBio* **2020**, *11* (4), 1–15. <https://doi.org/10.1128/mBio.01249-20>.
- (36) Serrano, E.; Storebakken, T.; Penn, M.; Øverland, M.; Øvrund, J.; Torunn, L. Responses in Rainbow Trout (*Oncorhynchus mykiss*) to Increasing Dietary Doses of Lupinine, the Main Quinolizidine Alkaloid Found in Yellow Lupins (*Lupinus luteus*). *Aquaculture* **2011**, *318* (1–2), 122–127. <https://doi.org/10.1016/j.aquaculture.2011.05.004>.

- (37) Morita, H.; Hirasawa, Y.; Shinzato, T.; Kobayashi, J. New Phlegmarane-Type, Cernuane-Type, and Quinolizidine Alkaloids from Two Species of *Lycopodium*. *Tetrahedron* **2004**, *60* (33), 7015–7023. <https://doi.org/10.1016/j.tet.2003.09.106>.
- (38) Fitch, R. W.; Garraffo, H. M.; Spande, T. F.; Yeh, H. J. C.; Daly, J. W. Bioassay-Guided Isolation of Epiquinamide, a Novel Quinolizidine Alkaloid and Nicotinic Agonist from an Ecuadoran Poison Frog, *Epipedobates Tricolor*. *J. Nat. Prod.* **2003**, *66* (10), 1345–1350. <https://doi.org/10.1021/np030306u>.
- (39) Raub, M. F.; Cardellina, J. H.; Choudhary, M. I.; Ni, C. Z.; Clardy, J.; Alley, M. C. Clavepictines A and B: Cytotoxic Quinolizidines from the Tunicate *Clavelina picta*. *J. Am. Chem. Soc.* **1991**, *113* (8), 3178–3180. <https://doi.org/10.1021/ja00008a060>.
- (40) Tsuneki, H.; You, Y.; Toyooka, N.; Sasaoka, T.; Nemoto, H.; Dani, J. A.; Kimura, I. Marine Alkaloids (-)-Pictamine and (-)-Lepadin B Block Neuronal Nicotinic Acetylcholine Receptors. *Biol. Pharm. Bull.* **2005**, *28* (4), 611–614. <https://doi.org/10.1248/bpb.28.611>.
- (41) Hirasawa, Y.; Kato, Y.; Wong, C. P.; Uchiyama, N.; Goda, Y.; Hadi, A. H. A.; Ali, H. M.; Morita, H. Hupermine A, a Novel C16N2-Type *Lycopodium* Alkaloid from *Huperzia phlegmaria*. *Tetrahedron Lett.* **2014**, *55* (11), 1902–1904. <https://doi.org/10.1016/j.tetlet.2014.01.141>.
- (42) Yan Zhang, Wen-Zhong Hu, Xiao-Zhong Che, Yu-Bo Peng, Li-Yan Song, Y.-S. S. Bioactive Quinolizidine Alkaloids from *Sophora tonkinensis*. *China J. Chinese Mater. Medica* **2016**, *41* (12), 2261–2266. <https://doi.org/10.4268/cjcmm20161215>.
- (43) Doan Thi, T. A.; Trinh Thi, T. Van; Thi Mai Huong, D.; Le, H. T.; Litaudon, M.; Nguyen, V. H.; Chau, V. M.; Pham, V. C. Cytotoxic Alkaloids from Leaves of *Pilea* Aff. *Martinii*. *Planta Med.* **2019**, *85* (6), 496–502. <https://doi.org/10.1055/a-0826-0483>.
- (44) Pouny, I.; Long, C.; Batut, M.; Aussagues, Y.; Jean Valère, N.; Achoundong, G.; David, B.; Lavaud, C.; Massiot, G. Quinolizidine Alkaloids from *Cylicomorpha solmsii*. *J. Nat. Prod.* **2021**, *84* (4), 1198–1202. <https://doi.org/10.1021/acs.jnatprod.0c01261>.
- (45) Atta-ur-Rahman; Shahwar, D.; Parween, Z.; Choudhary, M. I.; Sener, B.; Toker, G.; Baser, K. H. C. New Alkaloids from *Bongardia chrysogonum*. *Nat. Prod. Lett.* **1998**, *12* (3), 161–173. <https://doi.org/10.1080/10575639808048287>.
- (46) Matsuda, H.; Morikawa, T.; Oda, M.; Asao, Y.; Yoshikawa, M. Potent Anti-Metastatic Activity of Dimeric Sesquiterpene Thioalkaloids from the Rhizome of *Nuphar pumilum*. *Bioorganic Med. Chem. Lett.* **2003**, *13* (24), 4445–4449. <https://doi.org/10.1016/j.bmcl.2003.09.019>.
- (47) Hirasawa, Y.; Morita, H.; Kobayashi, J. Senepodine F, a New C22N2 Alkaloid from *Lycopodium chinense*. *Heterocycles* **2004**, *64* (1), 515–521. [https://doi.org/10.3987/COM-04-S\(P\)44](https://doi.org/10.3987/COM-04-S(P)44).
- (48) Hirasawa, Y.; Morita, H.; Kobayashi, J. Senepodines B–E, New C22N2 Alkaloids from *Lycopodium chinense*. *Tetrahedron* **2003**, *59* (20), 3567–3573. [https://doi.org/10.1016/S0040-4020\(03\)00545-3](https://doi.org/10.1016/S0040-4020(03)00545-3).
- (49) Hirasawa, Y.; Tanaka, T.; Koyama, K.; Morita, H. Lycochinines A–C, Novel C27N3 Alkaloids from *Lycopodium chinense*. *Tetrahedron Lett.* **2009**, *50* (34), 4816–4819. <https://doi.org/10.1016/j.tetlet.2009.05.072>.
- (50) Morita, H.; Hirasawa, Y.; Kobayashi, J. I. Himeradine A, a Novel C27N3-Type Alkaloid from *Lycopodium chinense*. *J. Org. Chem.* **2003**, *68* (11), 4563–4566. <https://doi.org/10.1021/jo034294t>.

- (51) Wang, H.; Yang, S.; Zhou, H.; Sun, M.; Du, L.; Wei, M.; Luo, M.; Huang, J.; Deng, H.; Feng, Y.; Huang, J.; Zhou, Y. Aloperine Executes Antitumor Effects against Multiple Myeloma through Dual Apoptotic Mechanisms. *J. Hematol. Oncol.* **2015**, *8* (1), 1–13. <https://doi.org/10.1186/s13045-015-0120-x>.
- (52) Chen, S.; Jin, Z.; Dai, L.; Wu, H.; Wang, J.; Wang, L.; Zhou, Z.; Yang, L.; Gao, W. Aloperine Induces Apoptosis and Inhibits Invasion in MG-63 and U2OS Human Osteosarcoma Cells. *Biomed. Pharmacother.* **2018**, *97* (September 2017), 45–52. <https://doi.org/10.1016/j.biopha.2017.09.066>.
- (53) Lee, Y. R.; Chen, S. H.; Lin, C. Y.; Chao, W. Y.; Lim, Y. P.; Yu, H. I.; Lu, C. H. In Vitro Antitumor Activity of Aloperine on Human Thyroid Cancer Cells through Caspase-Dependent Apoptosis. *Int. J. Mol. Sci.* **2018**, *19* (1), 1–13. <https://doi.org/10.3390/ijms19010312>.
- (54) Zhou, K.-S.; Yi, P.; Yang, T.; Tian, W.; Yang, F.-M.; Lee, K.-H.; Zhao, B.-Y.; Wang, Y.-H.; Tan, C.-J. Ochrocephalamines B–D, Three Alkaloids from *Oxytropis ochrocephala* Bunge. *Org. Lett.* **2019**, *21* (13), 5051–5054. <https://doi.org/10.1021/acs.orglett.9b01643>.
- (55) Xue, Z.; Zhang, Y. K.; Yi, P.; Yang, F. M.; Huo, X. M.; Wang, T. T.; Zhang, H. Y.; Zhao, B. Y.; Zeng, Y. R.; Wang, Y. H.; Tan, C. J. Ochrocephalamines E and F, Two New Alkaloids from *Oxytropis ochrocephala* Bung. *Tetrahedron Lett.* **2022**, *102*, 2–5. <https://doi.org/10.1016/j.tetlet.2022.153943>.
- (56) Wagner, S.; Sigl, S.; Schenkl, M.; Breuning, M. Diastereodivergent Synthesis of the Quinolizidine-Indolizidine Alkaloids of the Leontidine/Camoensine Family. *European J. Org. Chem.* **2021**, *2021* (17), 2498–2505. <https://doi.org/10.1002/ejoc.202100270>.
- (57) Tang, Y.; Li, N.; Zou, Y.; Ai, Y.; Ma, G. L.; Osman, E. E. A.; Xiong, J.; Li, J.; Jin, Z. X.; Hu, J. F. LC-MS Guided Isolation and Dereplication of *Lycopodium* Alkaloids from *Lycopodium cernuum* Var. *Sikkimense* of Different Geographical Origins. *Phytochemistry* **2019**, *160* (December 2018), 25–30. <https://doi.org/10.1016/j.phytochem.2019.01.006>.
- (58) Bravo, J. A.; Lavaud, C.; Bourdy, G.; Deharo, E.; Gimenez, A.; Sauvain, M. Antimalarial Activity of Ormosanine and Hormoormosanine from *Bowdichia virgiloides*. *Rev. Boliv. Quim.* **2002**, *19* (1), 12–17.
- (59) Abdel-Şattar, E.; Abdallah, H. M.; El-Mekkawy, S.; Ichino, C.; Kiyohara, H.; Yamada, H. Antimalarial Alkaloid from *Hypoestes forskoolii*. *Exp. Parasitol.* **2020**, *211* (June 2019), 1–5. <https://doi.org/10.1016/j.exppara.2020.107851>.
- (60) Liu, Y.; Qing, L.; Meng, C.; Shi, J.; Yang, Y.; Wang, Z.; Han, G.; Wang, Y.; Ding, J.; Meng, L. hua; Wang, Q. 6-OH-Phenanthroquinolizidine Alkaloid and Its Derivatives Exert Potent Anticancer Activity by Delaying S Phase Progression. *J. Med. Chem.* **2017**, *60* (7), 2764–2779. <https://doi.org/10.1021/acs.jmedchem.6b01502>.
- (61) Krmpotic, E.; Farnsworth, N. R.; Messmer, W. M. Cryptopleurine, an Active Antiviral Alkaloid from *Boehmeria cylindrica* (L.) Sw. (Urticaceae). *J. Pharm. Sci.* **1972**, *61* (9), 1508–1509. <https://doi.org/10.1002/jps.2600610945>.
- (62) Cai, X. F.; Jin, X.; Lee, D.; Yang, Y. T.; Lee, K.; Hong, Y. S.; Lee, J. H.; Lee, J. J. Phenanthroquinolizidine Alkaloids from the Roots of *Boehmeria pinnata* Potently Inhibit Hypoxia-Inducible Factor-1 in AGS Human Gastric Cancer Cells. *J. Nat. Prod.* **2006**, *69* (7), 1095–1097. <https://doi.org/10.1021/np060081y>.
- (63) Luo, Y.; Liu, Y.; Luo, D.; Gao, X.; Li, B.; Zhang, G. Cytotoxic Alkaloids from *Boehmeria siamensis*. *Planta Med.* **2003**, *69* (9), 842–845.

<https://doi.org/10.1055/s-2003-43215>.

- (64) Christodoulou, M. S.; Calogero, F.; Baumann, M.; García-Argáez, A. N.; Pieraccini, S.; Sironi, M.; Dapiaggi, F.; Bucci, R.; Brogini, G.; Gazzola, S.; Liekens, S.; Silvani, A.; Lahtela-Kakkonen, M.; Martinet, N.; Nonell-Canals, A.; Santamaría-Navarro, E.; Baxendale, I. R.; Dalla Via, L.; Passarella, D. Boehmeriasin A as New Lead Compound for the Inhibition of Topoisomerases and SIRT2. *Eur. J. Med. Chem.* **2015**, *92* (1), 766–775. <https://doi.org/10.1016/j.ejmech.2015.01.038>.
- (65) Ohsaki, A.; Nagaoka, T.; Yoneda, K.; Kishida, A. Secu'amamines E-G, New Alkaloids from *Securinega suffruticosa* Var. *Amamiensis*. *Tetrahedron Lett.* **2009**, *50* (50), 6965–6967. <https://doi.org/10.1016/j.tetlet.2009.09.138>.
- (66) Qin, S.; Liang, J. Y.; Guo, Y. W. Two New Securinega Alkaloids from *Securinega suffruticosa*. *Helv. Chim. Acta* **2009**, *92* (2), 399–403. <https://doi.org/10.1002/hlca.200800263>.
- (67) Cao, M. M.; Zhang, Y.; Li, X. H.; Peng, Z. G.; Jiang, J. D.; Gu, Y. C.; Di, Y. T.; Li, X. N.; Chen, D. Z.; Xia, C. F.; He, H. P.; Li, S. L.; Hao, X. J. Cyclohexane-Fused Octahydroquinolizine Alkaloids from *Myrioneuron faberi* with Activity against Hepatitis C Virus. *J. Org. Chem.* **2014**, *79* (17), 7945–7950. <https://doi.org/10.1021/jo501076x>.
- (68) Lee, I.; Youn, U.; Kim, H.; Min, B.; Kim, J. S.; Bae, K. Biphenyl and Biphenyl Ether Quinolizidine N -Oxide Alkaloids from *Lagerstroemia indica* L. *Planta Med.* **2011**, *77* (18), 2037–2041. <https://doi.org/10.1055/s-0031-1280064>.
- (69) Rumalla, C. S.; Jadhav, A. N.; Smillie, T.; Fronczek, F. R.; Khan, I. A. Alkaloids from *Heimia salicifolia*. *Phytochemistry* **2008**, *69* (8), 1756–1762. <https://doi.org/10.1016/j.phytochem.2008.01.028>.
- (70) Dung, D. T.; Hang, D. T. T.; Yen, P. H.; Quang, T. H.; Nhiem, N. X.; Tai, B. H.; Minh, C. Van; Kim, Y.-C.; Kim, D. C.; Oh, H.; Kiem, P. Van. Macrocyclic Bis -Quinolizidine Alkaloids from *Xestospongia muta*. *Nat. Prod. Res.* **2019**, *33* (3), 400–406. <https://doi.org/10.1080/14786419.2018.1455043>.
- (71) Chen, B.; Huan, X. J.; Miao, Z. H.; de Voogd, N. J.; Gu, Y. C.; Wang, C. Y.; Guo, Y. W.; Li, X. W. Uncommon Bis-Quinolizidine Alkaloids from the Hainan Sponge *Neopetrosia chaliniformis*. *Chinese J. Chem.* **2021**, *39* (7), 1838–1842. <https://doi.org/10.1002/cjoc.202100091>.
- (72) Liu, H.; Mishima, Y.; Fujiwara, T.; Nagai, H.; Kitazawa, A.; Mine, Y.; Kobayashi, H.; Yao, X.; Yamada, J.; Oda, T.; Namikoshi, M. Isolation of Araguspongine M, a New Stereoisomer of an Araguspongine/Xestospongine Alkaloid, and Dopamine from the Marine Sponge *Neopetrosia exigua* Collected in Palau. *Mar. Drugs* **2004**, *2* (4), 154–163. <https://doi.org/10.3390/md204154>.
- (73) Orabi, K. Y.; El Sayed, K. A.; Hamann, M. T.; Chuck Dunbar, D.; Al-Said, M. S.; Higa, T.; Kelly, M. Araguspongines K and L, New Bioactive Bis-1-Oxaquinolizidine N-Oxide Alkaloids from Red Sea Specimens of *Xestospongia exigua*. *J. Nat. Prod.* **2002**, *65* (12), 1782–1785. <https://doi.org/10.1021/np0202226>.
- (74) Kobayashi, M.; Kawazoe, K.; Kitagawa, I. Araguspongines B, C, D, E, F, G, H, and J, New Vasodilative Bis-1-Oxaquinolizidine Alkaloids from an Okinawan Marine Sponge, *Xestospongia* Sp. *Chem. Pharm. Bull. (Tokyo)*. **1989**, *37* (6), 1676–1678. <https://doi.org/10.1248/cpb.37.1676>.

- (75) Wang, F.; Wang, Y.; Polavarapu, P. L.; Li, T.; Pietrusiewicz, K. M.; Zygo, K. (+)-7S-Hydroxyxestospongine A from the Marine Sponge *Xestospongia* Sp. and Absolute Configuration of (+)-Xestospongine D. *J. Nat. Prod.* **2002**, *65* (3), 249–254.
- (76) Quirion, J.-C.; Sevenet, T.; Husson, H.-P.; Weniger, B.; Debitus, C. Two New Alkaloids from *Xestospongia* Sp., a New Caledonian Sponge. *J. Nat. Prod.* **1992**, *55* (10), 1505–1508. <https://doi.org/10.1021/np50088a017>.
- (77) Vassas, A.; Bourdy, G.; Paillard, J. J.; Lavayre, J.; Païs, M.; Quirion, J. C.; Debitus, C. Naturally Occurring Somatostatin and Vasoactive Intestinal Peptide Inhibitors. Isolation of Alkaloids from Two Marine Sponges. *Planta Med.* **1996**, *62* (1), 28–30. <https://doi.org/10.1055/s-2006-957790>.
- (78) De Smet, P.; Parys, J. B.; Callewaert, G.; Weidema, A. F.; Hill, E.; De Smedt, H.; Erneux, C.; Sorrentino, V.; Missiaen, L. Xestospongine C Is an Equally Potent Inhibitor of the Inositol 1,4,5-Trisphosphate Receptor and the Endoplasmic-Reticulum Ca<sup>2+</sup> Pumps. *Cell Calcium* **1999**, *26* (1–2), 9–13. <https://doi.org/10.1054/ceca.1999.0047>.
- (79) Stingl, J.; Andersen, R. J.; Emerman, J. T. *In Vitro* Screening of Crude Extracts and Pure Metabolites Obtained from Marine Invertebrates for the Treatment of Breast Cancer. *Cancer Chemother. Pharmacol.* **1992**, *30* (5), 401–406. <https://doi.org/10.1007/BF00689969>.
- (80) Venkateshwar Goud, T.; Srinivasa Reddy, N.; Raghavendra Swamy, N.; Siva Ram, T.; Venkateswarlu, Y. Anti-HIV Active Petrosins from the Marine Sponge *Petrosia similis*. *Biol. Pharm. Bull.* **2003**, *26* (10), 1498–1501. <https://doi.org/10.1248/bpb.26.1498>.
- (81) Liu, L. N.; Ran, J. Q.; Li, L. J.; Zhao, Y.; Goto, M.; Morris-Natschke, S. L.; Lee, K. H.; Zhao, B. Y.; Tan, C. J. Ochrocephalamine A, a New Quinolizidine Alkaloid from *Oxytropis ochrocephala* Bunge. *Tetrahedron Lett.* **2016**, *57* (46), 5047–5049. <https://doi.org/10.1016/j.tetlet.2016.10.009>.
- (82) Yuan, X.; Jiang, J.; Yang, Y.; Zhang, X.; Feng, Z.; Zhang, P. Three Quinolizidine Dimers from the Seeds of *Sophora alopecuroides* and Their Hepatoprotective Activities. *Chinese Chem. Lett.* **2022**, *33* (6), 2923–2927. <https://doi.org/10.1016/j.ccllet.2021.10.085>.
